# Supplementary material for: Warm seawater temperature promotes substrate colonization by the blue coral, Heliopora coerulea
Source: PeerJ. 2019 Sep 27;7:e7785. doi: 10.7717/peerj.7785 (PMC6768060; doi:10.7717/peerj.7785)
Supplement: Supplemental Information 4 [file peerj-07-7785-s004.xlsx]

## Sheet: Calcified encrusting vs margin
Calcified encrusting vs margin
PFAM	ID	Desc	Encrusting	Margin
PF01391	Collagen triple helix repeat (20 copies)	Collagen	11	0
PF05184	Saposin-like type B, region 1	SapB_1	10	0
PF00089	Trypsin	Trypsin	10	0
PF07719	Tetratricopeptide repeat	TPR_2	9	0
PF07648	Kazal-type serine protease inhibitor domain	Kazal_2	8	0
PF00435	Spectrin repeat	Spectrin	8	0
PF00050	Kazal-type serine protease inhibitor domain	Kazal_1	7	0
PF03489	Saposin-like type B, region 2	SapB_2	7	0
PF00515	Tetratricopeptide repeat	TPR_1	7	0
PF13833	EF-hand domain pair	EF-hand_8	6	3
PF00246	Zinc carboxypeptidase	Peptidase_M14	6	0
PF02244	Carboxypeptidase activation peptide	Propep_M14	6	0
PF00036	EF hand	EF-hand_1	5	3
PF13405	EF-hand domain	EF-hand_6	5	3
PF13202	EF hand	EF-hand_5	5	0
PF00560	Leucine Rich Repeat	LRR_1	5	0
PF13516	Leucine Rich repeat	LRR_6	5	0
PF00069	Protein kinase domain	Pkinase	5	0
PF01290	Thymosin beta-4 family	Thymosin	5	0
PF13499	EF-hand domain pair	EF-hand_7	4	2
PF00386	C1q domai	C1q	4	0
PF01607	Chitin binding Peritrophin-A domain	CBM_14	4	0
PF00722	Glycosyl hydrolases family 16	Glyco_hydro_16	4	0
PF07714	Protein tyrosine kinase	Pkinase_Tyr	4	0
PF13424	Tetratricopeptide repeat	TPR_12	4	0
PF00092	von Willebrand factor type A domain	VWA	4	0
PF02806	Alpha amylase, C-terminal all-beta domain	Alpha-amylase_C	3	0
PF03098	Animal haem peroxidase	An_peroxidase	3	0
PF00307	Calponin homology (CH) domain	CH	3	0
PF00008	EGF-like domain	EGF	3	0
PF00626	Gelsolin repeat	Gelsolin	3	0
PF00704	Glycosyl hydrolases family 18	Glyco_hydro_18	3	0
PF12799	Leucine Rich repeats (2 copies)	LRR_4	3	0
PF03762	Vitelline membrane outer layer protein I (VOMI)	VOMI	3	0
PF07678	A-macroglobulin TED domain	A2M_comp	2	0
PF07677	A-macroglobulin receptor binding domain	A2M_recep	2	0
PF05270	Alpha-L-arabinofuranosidase B (ABFB) domain	AbfB	2	0
PF00128	Alpha amylase, catalytic domain	Alpha-amylase	2	0
PF00025	ADP-ribosylation factor family	Arf	2	0
PF07654	Immunoglobulin C1-set domain	C1-set	2	0
PF08205	CD80-like C2-set immunoglobulin domain	C2-set_2	2	0
PF11971	CAMSAP CH domain	CAMSAP_CH	2	0
PF00690	Cation transporter/ATPase, N-terminus	Cation_ATPase_N	2	0
PF00031	Cystatin domain	Cystatin	2	0
PF00122	E1-E2 ATPase	E1-E2_ATPase	2	0
PF04670	Gtr1/RagA G protein conserved region	Gtr1_RagA	2	0
PF07679	Immunoglobulin I-set domain	I-set	2	0
PF00047	Immunoglobulin domain	ig	2	0
PF13895	Immunoglobulin domain	Ig_2	2	0
PF13927	Immunoglobulin domain	Ig_3	2	0
PF14295	PAN domain	PAN_4	2	0
PF01326	Pyruvate phosphate dikinase, PEP/pyruvate binding domain	PPDK_N	2	0
PF00347	Ribosomal protein L6	Ribosomal_L6	2	0
PF00333	Ribosomal protein S5, N-terminal domain	Ribosomal_S5	2	0
PF13365	Trypsin-like peptidase domain	Trypsin_2	2	0
PF07686	Immunoglobulin V-set domain	V-set	2	0
PF13519	von Willebrand factor type A domain	VWA_2	2	0
PF00413	Matrixin	Peptidase_M10	1	2
PF00022	Actin	Actin	1	0
PF08240	Alcohol dehydrogenase GroES-like domain	ADH_N	1	0
PF00266	Aminotransferase class-V	Aminotran_5	1	0
PF00006	ATP synthase alpha/beta family, nucleotide-binding domain	ATP-synt_ab	1	0
PF01145	SPFH domain / Band 7 family	Band_7	1	0
PF05837	Centromere protein H (CENP-H)	CENP-H	1	0
PF00118	TCP-1/cpn60 chaperonin family	Cpn60_TCP1	1	0
PF09353	Domain of unknown function (DUF1995)	DUF1995	1	0
PF04273	Putative phosphatase (DUF442)	DUF442	1	0
PF03372	Endonuclease/Exonuclease/phosphatase family	Exo_endo_phos	1	0
PF02469	Fasciclin domain	Fasciclin	1	0
PF00038	Intermediate filament protein	Filament	1	0
PF14670	Coagulation Factor Xa inhibitory site	FXa_inhibition	1	0
PF00503	G-protein alpha subunit	G-alpha	1	0
PF00996	GDP dissociation inhibitor	GDI	1	0
PF00759	Glycosyl hydrolase family 9	Glyco_hydro_9	1	0
PF08246	Cathepsin propeptide inhibitor domain (I29)	Inhibitor_I29	1	0
PF00753	Metallo-beta-lactamase superfamily	Lactamase_B	1	0
PF13385	Concanavalin A-like lectin/glucanases superfamily	Laminin_G_3	1	0
PF05147	Lanthionine synthetase C-like protein	LANC_like	1	0
PF00149	Calcineurin-like phosphoesterase	Metallophos	1	0
PF01699	Sodium/calcium exchanger protein	Na_Ca_ex	1	0
PF00931	NB-ARC domain	NB-ARC	1	0
PF00141	Peroxidase	peroxidase	1	0
PF10142	PhoPQ-activated pathogenicity-related protein	PhoPQ_related	1	0
PF14752	Retinol binding protein receptor	RBP_receptor	1	0
PF01421	Reprolysin (M12B) family zinc metalloprotease	Reprolysin	1	0
PF00181	Ribosomal Proteins L2, RNA binding domain	Ribosomal_L2	1	0
PF03947	Ribosomal Proteins L2, C-terminal domain	Ribosomal_L2_C	1	0
PF00237	Ribosomal protein L22p/L17e	Ribosomal_L22	1	0
PF00297	Ribosomal protein L3	Ribosomal_L3	1	0
PF03719	Ribosomal protein S5, C-terminal domain	Ribosomal_S5_C	1	0
PF00177	Ribosomal protein S7p/S5e	Ribosomal_S7	1	0
PF00319	SRF-type transcription factor (DNA-binding and dimerisation domain)	SRF-TF	1	0
PF01026	TatD related DNase	TatD_DNase	1	0
PF07534	TLD	TLD	1	0
PF00179	Ubiquitin-conjugating enzyme	UQ_con	1	0
PF00045	Hemopexin	Hemopexin	0	4

## Sheet: Vertical vs horizontal
Vertical vs horizontal region
PFAM	ID	Desc	UP	DOWN
PF00530	SRCR	Scavenger receptor cysteine-rich domain	489	4
PF13606	Ank_3	Ankyrin repeat	356	20
PF00023	Ank	Ankyrin repeat	347	16
PF13857	Ank_5	Ankyrin repeats (many copies)	302	20
PF01391	Collagen	Collagen triple helix repeat (20 copies)	298	3
PF00036	EF-hand_1	EF hand	298	2
PF13405	EF-hand_6	EF-hand domain	294	2
PF15494	SRCR_2	Scavenger receptor cysteine-rich domain	291	2
PF13637	Ank_4	Ankyrin repeats (many copies)	289	13
PF13927	Ig_3	Immunoglobulin domain	288	11
PF00400	WD40	WD domain, G-beta repeat	277	0
PF13895	Ig_2	Immunoglobulin domain	251	6
PF07679	I-set	Immunoglobulin I-set domain	233	11
PF00008	EGF	EGF-like domain	226	68
PF13833	EF-hand_8	EF-hand domain pair	219	2
PF03160	Calx-beta	Calx-beta domain	210	2
PF00047	ig	Immunoglobulin domain	203	8
PF13202	EF-hand_5	EF hand	202	2
PF12796	Ank_2	Ankyrin repeats (3 copies)	201	10
PF00396	Granulin	Granulin	197	0
PF13499	EF-hand_7	EF-hand domain pair	191	1
PF00076	RRM_1	RNA recognition motif. (a.k.a. RRM, RBD, or RNP domain)	186	3
PF00069	Pkinase	Protein kinase domain	180	9
PF07714	Pkinase_Tyr	Protein tyrosine kinase	166	6
PF00041	fn3	Fibronectin type III domain	164	2
PF07645	EGF_CA	Calcium-binding EGF domain	137	66
PF07974	EGF_2	EGF-like domain	133	4
PF12661	hEGF	Human growth factor-like EGF	121	64
PF00630	Filamin	Filamin/ABP280 repeat	115	0
PF13428	TPR_14	Tetratricopeptide repeat	107	13
PF00515	TPR_1	Tetratricopeptide repeat	103	18
PF12799	LRR_4	Leucine Rich repeats (2 copies)	101	22
PF02985	HEAT	HEAT repeat	101	0
PF12662	cEGF	Complement Clr-like EGF-like	99	60
PF00089	Trypsin	Trypsin	99	4
PF14670	FXa_inhibition	Coagulation Factor Xa inhibitory site	98	22
PF07719	TPR_2	Tetratricopeptide repeat	97	14
PF00626	Gelsolin	Gelsolin repeat	95	0
PF13646	HEAT_2	HEAT repeats	94	0
PF07686	V-set	Immunoglobulin V-set domain	93	12
PF00084	Sushi	Sushi domain (SCR repeat)	90	8
PF13855	LRR_8	Leucine rich repeat	87	13
PF00013	KH_1	KH domain	86	0
PF00514	Arm	Armadillo/beta-catenin-like repeat	86	0
PF00025	Arf	ADP-ribosylation factor family	85	0
PF12947	EGF_3	EGF domain	84	63
PF00071	Ras	Ras family	82	1
PF00102	Y_phosphatase	Protein-tyrosine phosphatase	81	0
PF13176	TPR_7	Tetratricopeptide repeat	79	15
PF00085	Thioredoxin	Thioredoxin	77	3
PF00307	CH	Calponin homology (CH) domain	77	0
PF13516	LRR_6	Leucine Rich repeat	76	21
PF00112	Peptidase_C1	Papain family cysteine protease	76	0
PF13181	TPR_8	Tetratricopeptide repeat	75	18
PF13465	zf-H2C2_2	Zinc-finger double domain	75	5
PF01535	PPR	PPR repeat	74	5
PF13513	HEAT_EZ	HEAT-like repeat	69	0
PF03489	SapB_2	Saposin-like type B, region 2	67	0
PF13041	PPR_2	PPR repeat family	66	5
PF00092	VWA	von Willebrand factor type A domain	66	4
PF13905	Thioredoxin_8	Thioredoxin-like	66	2
PF13414	TPR_11	TPR repeat	66	0
PF01826	TIL	Trypsin Inhibitor like cysteine rich domain	66	0
PF00096	zf-C2H2	Zinc finger, C2H2 type	61	5
PF00431	CUB	CUB domain	59	0
PF13894	zf-C2H2_4	C2H2-type zinc finger	58	5
PF01608	I_LWEQ	I/LWEQ domain	57	0
PF13432	TPR_16	Tetratricopeptide repeat	56	2
PF13098	Thioredoxin_2	Thioredoxin-like domain	55	2
PF00018	SH3_1	SH3 domain	55	1
PF00595	PDZ	PDZ domain (Also known as DHR or GLGF)	55	0
PF13174	TPR_6	Tetratricopeptide repeat	54	6
PF13424	TPR_12	Tetratricopeptide repeat	53	15
PF14559	TPR_19	Tetratricopeptide repeat	52	0
PF00504	Chloroa_b-bind	Chlorophyll A-B binding protein	51	0
PF13519	VWA_2	von Willebrand factor type A domain	50	4
PF00057	Ldl_recept_a	Low-density lipoprotein receptor domain class A	50	0
PF00578	AhpC-TSA	AhpC/TSA family	49	2
PF13812	PPR_3	Pentatricopeptide repeat domain	47	4
PF00171	Aldedh	Aldehyde dehydrogenase family	47	0
PF05184	SapB_1	Saposin-like type B, region 1	46	0
PF00017	SH2	SH2 domain	45	0
PF00153	Mito_carr	Mitochondrial carrier protein	44	0
PF14604	SH3_9	Variant SH3 domain	43	2
PF00168	C2	C2 domain	43	0
PF13431	TPR_17	Tetratricopeptide repeat	42	11
PF00028	Cadherin	Cadherin domain	42	0
PF05375	Pacifastin_I	Pacifastin inhibitor (LCMII)	42	0
PF00095	WAP	WAP-type (Whey Acidic Protein) 'four-disulfide core'	42	0
PF00106	adh_short	short chain dehydrogenase	41	1
PF07653	SH3_2	Variant SH3 domain	41	0
PF08246	Inhibitor_I29	Cathepsin propeptide inhibitor domain (I29)	41	0
PF07650	KH_2	KH domain	41	0
PF08205	C2-set_2	CD80-like C2-set immunoglobulin domain	41	0
PF13899	Thioredoxin_7	Thioredoxin-like	40	2
PF13561	adh_short_C2	Enoyl-(Acyl carrier protein) reductase	40	1
PF01926	MMR_HSR1	50S ribosome-binding GTPase	40	1
PF00169	PH	PH domain	40	1
PF00531	Death	Death domain	39	4
PF00240	ubiquitin	Ubiquitin family	39	2
PF00004	AAA	ATPase family associated with various cellular activities (AAA)	39	1
PF07716	bZIP_2	Basic region leucine zipper	39	0
PF03351	DOMON	DOMON domain	38	5
PF12717	Cnd1	non-SMC mitotic condensation complex subunit 1	38	0
PF12718	Tropomyosin_1	Tropomyosin like	38	0
PF01344	Kelch_1	Kelch motif	37	0
PF13964	Kelch_6	Kelch motif	37	0
PF00503	G-alpha	G-protein alpha subunit	37	0
PF00754	F5_F8_type_C	F5/8 type C domain	36	4
PF00637	Clathrin	Region in Clathrin and VPS	36	0
PF00170	bZIP_1	bZIP transcription factor	36	0
PF00412	LIM	LIM domain	35	1
PF13848	Thioredoxin_6	Thioredoxin-like domain	35	0
PF00009	GTP_EFTU	Elongation factor Tu GTP binding domain	35	0
PF01505	Vault	Major Vault Protein repeat	35	0
PF00248	Aldo_ket_red	Aldo/keto reductase family	34	0
PF03098	An_peroxidase	Animal haem peroxidase	33	0
PF00063	Myosin_head	Myosin head (motor domain)	33	0
PF00012	HSP70	Hsp70 protein	33	0
PF00059	Lectin_C	Lectin C-type domain	33	0
PF00560	LRR_1	Leucine Rich Repeat	32	30
PF13893	RRM_5	RNA recognition motif. (a.k.a. RRM, RBD, or RNP domain)	32	0
PF03143	GTP_EFTU_D3	Elongation factor Tu C-terminal domain	32	0
PF13374	TPR_10	Tetratricopeptide repeat	31	19
PF00086	Thyroglobulin_1	Thyroglobulin type-1 repeat	31	0
PF03193	DUF258	Protein of unknown function, DUF258	31	0
PF00501	AMP-binding	AMP-binding enzyme	31	0
PF03144	GTP_EFTU_D2	Elongation factor Tu domain 2	31	0
PF00118	Cpn60_TCP1	TCP-1/cpn60 chaperonin family	31	0
PF00014	Kunitz_BPTI	Kunitz/Bovine pancreatic trypsin inhibitor domain	31	0
PF01410	COLFI	Fibrillar collagen C-terminal domain	31	0
PF00373	FERM_M	FERM central domain	30	2
PF00271	Helicase_C	Helicase conserved C-terminal domain	30	0
PF01602	Adaptin_N	Adaptin N terminal region	30	0
PF00227	Proteasome	Proteasome subunit	30	0
PF13371	TPR_9	Tetratricopeptide repeat	29	3
PF00005	ABC_tran	ABC transporter	29	0
PF07647	SAM_2	SAM domain (Sterile alpha motif)	28	0
PF00191	Annexin	Annexin	28	0
PF13180	PDZ_2	PDZ domain	28	0
PF14295	PAN_4	PAN domain	28	0
PF02469	Fasciclin	Fasciclin domain	28	0
PF07654	C1-set	Immunoglobulin C1-set domain	28	0
PF02014	Reeler	Reeler domain	27	1
PF14531	Kinase-like	Kinase-like	27	0
PF00043	GST_C	Glutathione S-transferase, C-terminal domain	27	0
PF14497	GST_C_3	Glutathione S-transferase, C-terminal domain	27	0
PF10591	SPARC_Ca_bdg	Secreted protein acidic and rich in cysteine Ca binding region	27	0
PF13401	AAA_22	AAA domain	26	2
PF00536	SAM_1	SAM domain (Sterile alpha motif)	26	0
PF07992	Pyr_redox_2	Pyridine nucleotide-disulphide oxidoreductase	26	0
PF00241	Cofilin_ADF	Cofilin/tropomyosin-type actin-binding protein	26	0
PF01479	S4	S4 domain	26	0
PF00262	Calreticulin	Calreticulin family	26	0
PF00098	zf-CCHC	Zinc knuckle	25	0
PF00155	Aminotran_1_2	Aminotransferase class I and II	25	0
PF00335	Tetraspannin	Tetraspanin family	25	0
PF01399	PCI	PCI domain	25	0
PF00811	Ependymin	Ependymin	25	0
PF02218	HS1_rep	Repeat in HS1/Cortactin	25	0
PF13418	Kelch_4	Galactose oxidase, central domain	24	0
PF13415	Kelch_3	Galactose oxidase, central domain	24	0
PF00082	Peptidase_S8	Subtilase family	24	0
PF14392	zf-CCHC_4	Zinc knuckle	24	0
PF00244	14-3-3	14-3-3 protein	24	0
PF00183	HSP90	Hsp90 protein	24	0
PF08913	VBS	Vinculin Binding Site	24	0
PF09141	Talin_middle	Talin, middle domain	24	0
PF00149	Metallophos	Calcineurin-like phosphoesterase	23	1
PF09379	FERM_N	FERM N-terminal domain	23	0
PF00787	PX	PX domain	23	0
PF11976	Rad60-SLD	Ubiquitin-2 like Rad60 SUMO-like	23	0
PF02798	GST_N	Glutathione S-transferase, N-terminal domain	23	0
PF06119	NIDO	Nidogen-like	23	0
PF13917	zf-CCHC_3	Zinc knuckle	23	0
PF00050	Kazal_1	Kazal-type serine protease inhibitor domain	23	0
PF02803	Thiolase_C	Thiolase, C-terminal domain	23	0
PF04756	OST3_OST6	OST3 / OST6 family	23	0
PF13191	AAA_16	AAA ATPase domain	22	3
PF00067	p450	Cytochrome P450	22	3
PF08534	Redoxin	Redoxin	22	2
PF00246	Peptidase_M14	Zinc carboxypeptidase	22	0
PF01248	Ribosomal_L7Ae	Ribosomal protein L7Ae/L30e/S12e/Gadd45 family	22	0
PF12755	Vac14_Fab1_bd	Vacuolar 14 Fab1-binding region	22	0
PF00027	cNMP_binding	Cyclic nucleotide-binding domain	21	1
PF00450	Peptidase_S10	Serine carboxypeptidase	21	1
PF07646	Kelch_2	Kelch motif	21	0
PF13768	VWA_3	von Willebrand factor type A domain	21	0
PF00080	Sod_Cu	Copper/zinc superoxide dismutase (SODC)	21	0
PF08659	KR	KR domain	21	0
PF00210	Ferritin	Ferritin-like domain	21	0
PF13417	GST_N_3	Glutathione S-transferase, N-terminal domain	21	0
PF06268	Fascin	Fascin domain	21	0
PF00261	Tropomyosin	Tropomyosin	21	0
PF00006	ATP-synt_ab	ATP synthase alpha/beta family, nucleotide-binding domain	20	1
PF00782	DSPc	Dual specificity phosphatase, catalytic domain	20	0
PF00505	HMG_box	HMG (high mobility group) box	20	0
PF12171	zf-C2H2_jaz	Zinc-finger double-stranded RNA-binding	20	0
PF05001	RNA_pol_Rpb1_R	RNA polymerase Rpb1 C-terminal repeat	20	0
PF01851	PC_rep	Proteasome/cyclosome repeat	20	0
PF00722	Glyco_hydro_16	Glycosyl hydrolases family 16	20	0
PF02866	Ldh_1_C	lactate/malate dehydrogenase, alpha/beta C-terminal domain	20	0
PF13517	VCBS	Repeat domain in Vibrio, Colwellia, Bradyrhizobium and Shewanella	20	0
PF00010	HLH	Helix-loop-helix DNA-binding domain	19	2
PF00642	zf-CCCH	Zinc finger C-x8-C-x5-C-x3-H type (and similar)	19	2
PF00270	DEAD	DEAD/DEAH box helicase	19	0
PF09011	HMG_box_2	HMG-box domain	19	0
PF07648	Kazal_2	Kazal-type serine protease inhibitor domain	19	0
PF00481	PP2C	Protein phosphatase 2C	19	0
PF02874	ATP-synt_ab_N	ATP synthase alpha/beta family, beta-barrel domain	19	0
PF00428	Ribosomal_60s	60s Acidic ribosomal protein	19	0
PF00091	Tubulin	Tubulin/FtsZ family, GTPase domain	18	0
PF12763	EF-hand_4	Cytoskeletal-regulatory complex EF hand	18	0
PF04670	Gtr1_RagA	Gtr1/RagA G protein conserved region	18	0
PF00137	ATP-synt_C	ATP synthase subunit C	18	0
PF07004	SHIPPO-rpt	Sperm-tail PG-rich repeat	18	0
PF01400	Astacin	Astacin (Peptidase family M12A)	18	0
PF08662	eIF2A	Eukaryotic translation initiation factor eIF2A	18	0
PF00652	Ricin_B_lectin	Ricin-type beta-trefoil lectin domain	18	0
PF00108	Thiolase_N	Thiolase, N-terminal domain	18	0
PF00932	LTD	Lamin Tail Domain	18	0
PF13365	Trypsin_2	Trypsin-like peptidase domain	17	3
PF00147	Fibrinogen_C	Fibrinogen beta and gamma chains, C-terminal globular domain	17	1
PF00561	Abhydrolase_1	alpha/beta hydrolase fold	17	1
PF12146	Hydrolase_4	Putative lysophospholipase	17	1
PF00107	ADH_zinc_N	Zinc-binding dehydrogenase	17	0
PF00890	FAD_binding_2	FAD binding domain	17	0
PF05193	Peptidase_M16_C	Peptidase M16 inactive domain	17	0
PF02793	HRM	Hormone receptor domain	17	0
PF01839	FG-GAP	FG-GAP repeat	17	0
PF00402	Calponin	Calponin family repeat	17	0
PF00318	Ribosomal_S2	Ribosomal protein S2	17	0
PF00900	Ribosomal_S4e	Ribosomal family S4e	17	0
PF09325	Vps5	Vps5 C terminal like	17	0
PF00571	CBS	CBS domain	16	2
PF00094	VWD	von Willebrand factor type D domain	16	2
PF13854	Kelch_5	Kelch motif	16	0
PF00467	KOW	KOW motif	16	0
PF02493	MORN	MORN repeat	16	0
PF12874	zf-met	Zinc-finger of C2H2 type	16	0
PF00022	Actin	Actin	16	0
PF11971	CAMSAP_CH	CAMSAP CH domain	16	0
PF00160	Pro_isomerase	Cyclophilin type peptidyl-prolyl cis-trans isomerase/CLD	16	0
PF00024	PAN_1	PAN domain	16	0
PF01347	Vitellogenin_N	Lipoprotein amino terminal region	16	0
PF01159	Ribosomal_L6e	Ribosomal protein L6e	16	0
PF01246	Ribosomal_L24e	Ribosomal protein L24e	16	0
PF02800	Gp_dh_C	Glyceraldehyde 3-phosphate dehydrogenase, C-terminal domain	16	0
PF02460	Patched	Patched family	16	0
PF08241	Methyltransf_11	Methyltransferase domain	15	3
PF13639	zf-RING_2	Ring finger domain	15	1
PF00735	Septin	Septin	15	1
PF00058	Ldl_recept_b	Low-density lipoprotein receptor repeat class B	15	0
PF13912	zf-C2H2_6	C2H2-type zinc finger	15	0
PF01094	ANF_receptor	Receptor family ligand binding region	15	0
PF01370	Epimerase	NAD dependent epimerase/dehydratase family	15	0
PF00225	Kinesin	Kinesin motor domain	15	0
PF13450	NAD_binding_8	NAD(P)-binding Rossmann-like domain	15	0
PF02221	E1_DerP2_DerF2	ML domain	15	0
PF00254	FKBP_C	FKBP-type peptidyl-prolyl cis-trans isomerase	15	0
PF00070	Pyr_redox	Pyridine nucleotide-disulphide oxidoreductase	15	0
PF13410	GST_C_2	Glutathione S-transferase, C-terminal domain	15	0
PF01145	Band_7	SPFH domain / Band 7 family	15	0
PF03357	Snf7	Snf7	15	0
PF01576	Myosin_tail_1	Myosin tail	15	0
PF05922	Inhibitor_I9	Peptidase inhibitor I9	15	0
PF11715	Nup160	Nucleoporin Nup120/160	15	0
PF00397	WW	WW domain	14	3
PF14605	Nup35_RRM_2	Nup53/35/40-type RNA recognition motif	14	2
PF00046	Homeobox	Homeobox domain	14	0
PF02779	Transket_pyr	Transketolase, pyrimidine binding domain	14	0
PF00179	UQ_con	Ubiquitin-conjugating enzyme	14	0
PF09380	FERM_C	FERM C-terminal PH-like domain	14	0
PF02415	Chlam_PMP	Chlamydia polymorphic membrane protein (Chlamydia_PMP) repeat	14	0
PF00557	Peptidase_M24	Metallopeptidase family M24	14	0
PF01078	Mg_chelatase	Magnesium chelatase, subunit ChlI	14	0
PF00538	Linker_histone	linker histone H1 and H5 family	14	0
PF00689	Cation_ATPase_C	Cation transporting ATPase, C-terminus	14	0
PF00194	Carb_anhydrase	Eukaryotic-type carbonic anhydrase	14	0
PF00347	Ribosomal_L6	Ribosomal protein L6	14	0
PF02199	SapA	Saposin A-type domain	14	0
PF02883	Alpha_adaptinC2	Adaptin C-terminal domain	14	0
PF11838	ERAP1_C	ERAP1-like C-terminal domain	14	0
PF00175	NAD_binding_1	Oxidoreductase NAD-binding domain	13	2
PF03712	Cu2_monoox_C	Copper type II ascorbate-dependent monooxygenase, C-terminal domain	13	1
PF00226	DnaJ	DnaJ domain	13	0
PF00313	CSD	'Cold-shock' DNA-binding domain	13	0
PF01833	TIG	IPT/TIG domain	13	0
PF01593	Amino_oxidase	Flavin containing amine oxidoreductase	13	0
PF00462	Glutaredoxin	Glutaredoxin	13	0
PF00928	Adap_comp_sub	Adaptor complexes medium subunit family	13	0
PF02984	Cyclin_C	Cyclin, C-terminal domain	13	0
PF00217	ATP-gua_Ptrans	ATP:guanido phosphotransferase, C-terminal catalytic domain	13	0
PF00343	Phosphorylase	Carbohydrate phosphorylase	13	0
PF06723	MreB_Mbl	MreB/Mbl protein	13	0
PF00297	Ribosomal_L3	Ribosomal protein L3	13	0
PF01082	Cu2_monooxygen	Copper type II ascorbate-dependent monooxygenase, N-terminal domain	13	0
PF12349	Sterol-sensing	Sterol-sensing domain of SREBP cleavage-activation	13	0
PF04053	Coatomer_WDAD	Coatomer WD associated region	13	0
PF10517	DM13	Electron transfer DM13	13	0
PF13847	Methyltransf_31	Methyltransferase domain	12	2
PF13649	Methyltransf_25	Methyltransferase domain	12	2
PF02176	zf-TRAF	TRAF-type zinc finger	12	2
PF01392	Fz	Fz domain	12	1
PF13920	zf-C3HC4_3	Zinc finger, C3HC4 type (RING finger)	12	1
PF01282	Ribosomal_S24e	Ribosomal protein S24e	12	0
PF14560	Ubiquitin_2	Ubiquitin-like domain	12	0
PF12697	Abhydrolase_6	Alpha/beta hydrolase family	12	0
PF04969	CS	CS domain	12	0
PF01636	APH	Phosphotransferase enzyme family	12	0
PF00676	E1_dh	Dehydrogenase E1 component	12	0
PF01846	FF	FF domain	12	0
PF11901	DUF3421	Protein of unknown function (DUF3421)	12	0
PF02807	ATP-gua_PtransN	ATP:guanido phosphotransferase, N-terminal domain	12	0
PF02020	W2	eIF4-gamma/eIF5/eIF2-epsilon	12	0
PF00903	Glyoxalase	Glyoxalase/Bleomycin resistance protein/Dioxygenase superfamily	12	0
PF00188	CAP	Cysteine-rich secretory protein family	12	0
PF03947	Ribosomal_L2_C	Ribosomal Proteins L2, C-terminal domain	12	0
PF00573	Ribosomal_L4	Ribosomal protein L4/L1 family	12	0
PF01433	Peptidase_M1	Peptidase family M1	12	0
PF00330	Aconitase	Aconitase family (aconitate hydratase)	12	0
PF01394	Clathrin_propel	Clathrin propeller repeat	12	0
PF00090	TSP_1	Thrombospondin type 1 domain	11	3
PF05496	RuvB_N	Holliday junction DNA helicase ruvB N-terminus	11	1
PF00035	dsrm	Double-stranded RNA binding motif	11	1
PF00042	Globin	Globin	11	1
PF01055	Glyco_hydro_31	Glycosyl hydrolases family 31	11	0
PF00266	Aminotran_5	Aminotransferase class-V	11	0
PF00435	Spectrin	Spectrin repeat	11	0
PF03128	CXCXC	CXCXC repeat	11	0
PF09439	SRPRB	Signal recognition particle receptor beta subunit	11	0
PF13460	NAD_binding_10	NADH(P)-binding	11	0
PF07993	NAD_binding_4	Male sterility protein	11	0
PF00134	Cyclin_N	Cyclin, N-terminal domain	11	0
PF08240	ADH_N	Alcohol dehydrogenase GroES-like domain	11	0
PF05721	PhyH	Phytanoyl-CoA dioxygenase (PhyH)	11	0
PF00899	ThiF	ThiF family	11	0
PF00133	tRNA-synt_1	tRNA synthetases class I (I, L, M and V)	11	0
PF04749	PLAC8	PLAC8 family	11	0
PF01217	Clat_adaptor_s	Clathrin adaptor complex small chain	11	0
PF00493	MCM	MCM2/3/5 family	11	0
PF00564	PB1	PB1 domain	11	0
PF01120	Alpha_L_fucos	Alpha-L-fucosidase	11	0
PF14551	MCM_N	MCM N-terminal domain	11	0
PF01201	Ribosomal_S8e	Ribosomal protein S8e	11	0
PF03764	EFG_IV	Elongation factor G, domain IV	11	0
PF00572	Ribosomal_L13	Ribosomal protein L13	11	0
PF14204	Ribosomal_L18_c	Ribosomal L18 C-terminal region	11	0
PF14374	Ribos_L4_asso_C	60S ribosomal protein L4 C-terminal domain	11	0
PF08030	NAD_binding_6	Ferric reductase NAD binding domain	11	0
PF00044	Gp_dh_N	Glyceraldehyde 3-phosphate dehydrogenase, NAD binding domain	11	0
PF02847	MA3	MA3 domain	11	0
PF06229	FRG1	FRG1-like family	11	0
PF00305	Lipoxygenase	Lipoxygenase	11	0
PF00167	FGF	Fibroblast growth factor	11	0
PF09735	Nckap1	Membrane-associated apoptosis protein	11	0
PF00620	RhoGAP	RhoGAP domain	10	1
PF02463	SMC_N	RecF/RecN/SMC N terminal domain	10	0
PF00443	UCH	Ubiquitin carboxyl-terminal hydrolase	10	0
PF00003	7tm_3	7 transmembrane sweet-taste receptor of 3 GCPR	10	0
PF01485	IBR	IBR domain	10	0
PF01266	DAO	FAD dependent oxidoreductase	10	0
PF01073	3Beta_HSD	3-beta hydroxysteroid dehydrogenase/isomerase family	10	0
PF07724	AAA_2	AAA domain (Cdc48 subfamily)	10	0
PF13881	Rad60-SLD_2	Ubiquitin-2 like Rad60 SUMO-like	10	0
PF05739	SNARE	SNARE domain	10	0
PF05368	NmrA	NmrA-like family	10	0
PF01546	Peptidase_M20	Peptidase family M20/M25/M40	10	0
PF01044	Vinculin	Vinculin family	10	0
PF01565	FAD_binding_4	FAD binding domain	10	0
PF00769	ERM	Ezrin/radixin/moesin family	10	0
PF00038	Filament	Intermediate filament protein	10	0
PF04712	Radial_spoke	Radial spokehead-like protein	10	0
PF12348	CLASP_N	CLASP N terminal	10	0
PF03036	Perilipin	Perilipin family	10	0
PF08564	CDC37_C	Cdc37 C terminal domain	10	0
PF00056	Ldh_1_N	lactate/malate dehydrogenase, NAD binding domain	10	0
PF00466	Ribosomal_L10	Ribosomal protein L10	10	0
PF00281	Ribosomal_L5	Ribosomal protein L5	10	0
PF00327	Ribosomal_L30	Ribosomal protein L30p/L7e	10	0
PF00180	Iso_dh	Isocitrate/isopropylmalate dehydrogenase	10	0
PF00252	Ribosomal_L16	Ribosomal protein L16p/L10e	10	0
PF03931	Skp1_POZ	Skp1 family, tetramerisation domain	10	0
PF01092	Ribosomal_S6e	Ribosomal protein S6e	10	0
PF01130	CD36	CD36 family	10	0
PF07651	ANTH	ANTH domain	10	0
PF00157	Pou	Pou domain - N-terminal to homeobox domain	10	0
PF01234	NNMT_PNMT_TEMT	NNMT/PNMT/TEMT family	10	0
PF00093	VWC	von Willebrand factor type C domain	10	0
PF00338	Ribosomal_S10	Ribosomal protein S10p/S20e	10	0
PF03803	Scramblase	Scramblase	10	0
PF14523	Syntaxin_2	Syntaxin-like protein	10	0
PF13632	Glyco_trans_2_3	Glycosyl transferase family group 2	10	0
PF02157	Man-6-P_recep	Mannose-6-phosphate receptor	9	1
PF14543	TAXi_N	Xylanase inhibitor N-terminal	9	1
PF04548	AIG1	AIG1 family	9	1
PF00664	ABC_membrane	ABC transporter transmembrane region	9	0
PF03953	Tubulin_C	Tubulin C-terminal domain	9	0
PF13489	Methyltransf_23	Methyltransferase domain	9	0
PF00209	SNF	Sodium:neurotransmitter symporter family	9	0
PF07690	MFS_1	Major Facilitator Superfamily	9	0
PF07728	AAA_5	AAA domain (dynein-related subfamily)	9	0
PF03028	Dynein_heavy	Dynein heavy chain and region D6 of dynein motor	9	0
PF00125	Histone	Core histone H2A/H2B/H3/H4	9	0
PF00122	E1-E2_ATPase	E1-E2 ATPase	9	0
PF00611	FCH	Fes/CIP4, and EFC/F-BAR homology domain	9	0
PF00675	Peptidase_M16	Insulinase (Peptidase family M16)	9	0
PF01398	JAB	JAB1/Mov34/MPN/PAD-1 ubiquitin protease	9	0
PF02826	2-Hacid_dh_C	D-isomer specific 2-hydroxyacid dehydrogenase, NAD binding domain	9	0
PF09334	tRNA-synt_1g	tRNA synthetases class I (M)	9	0
PF13671	AAA_33	AAA domain	9	0
PF10601	zf-LITAF-like	LITAF-like zinc ribbon domain	9	0
PF00587	tRNA-synt_2b	tRNA synthetase class II core domain (G, H, P, S and T)	9	0
PF12872	OST-HTH	OST-HTH/LOTUS domain	9	0
PF00051	Kringle	Kringle domain	9	0
PF03051	Peptidase_C1_2	Peptidase C1-like family	9	0
PF10417	1-cysPrx_C	C-terminal domain of 1-Cys peroxiredoxin	9	0
PF01216	Calsequestrin	Calsequestrin	9	0
PF02991	Atg8	Autophagy protein Atg8 ubiquitin like	9	0
PF00438	S-AdoMet_synt_N	S-adenosylmethionine synthetase, N-terminal domain	9	0
PF02036	SCP2	SCP-2 sterol transfer family	9	0
PF02773	S-AdoMet_synt_C	S-adenosylmethionine synthetase, C-terminal domain	9	0
PF01015	Ribosomal_S3Ae	Ribosomal S3Ae family	9	0
PF10142	PhoPQ_related	PhoPQ-activated pathogenicity-related protein	9	0
PF00189	Ribosomal_S3_C	Ribosomal protein S3, C-terminal domain	9	0
PF15238	FAM181	FAM181	9	0
PF00199	Catalase	Catalase	9	0
PF00687	Ribosomal_L1	Ribosomal protein L1p/L10e family	9	0
PF14534	DUF4440	Domain of unknown function (DUF4440)	9	0
PF01199	Ribosomal_L34e	Ribosomal protein L34e	9	0
PF10584	Proteasome_A_N	Proteasome subunit A N-terminal signature	9	0
PF08264	Anticodon_1	Anticodon-binding domain of tRNA	9	0
PF00030	Crystall	Beta/Gamma crystallin	9	0
PF08762	CRPV_capsid	CRPV capsid protein like	9	0
PF09336	Vps4_C	Vps4 C terminal oligomerisation domain	9	0
PF10602	RPN7	26S proteasome subunit RPN7	9	0
PF04597	Ribophorin_I	Ribophorin I	9	0
PF10204	DuoxA	Dual oxidase maturation factor	9	0
PF10588	NADH-G_4Fe-4S_3	NADH-ubiquinone oxidoreductase-G iron-sulfur binding region	9	0
PF13599	Pentapeptide_4	Pentapeptide repeats (9 copies)	8	4
PF00415	RCC1	Regulator of chromosome condensation (RCC1) repeat	8	3
PF13540	RCC1_2	Regulator of chromosome condensation (RCC1) repeat	8	3
PF03145	Sina	Seven in absentia protein family	8	2
PF08242	Methyltransf_12	Methyltransferase domain	8	1
PF00441	Acyl-CoA_dh_1	Acyl-CoA dehydrogenase, C-terminal domain	8	1
PF00026	Asp	Eukaryotic aspartyl protease	8	1
PF02518	HATPase_c	Histidine kinase-, DNA gyrase B-, and HSP90-like ATPase	8	1
PF00909	Ammonium_transp	Ammonium Transporter Family	8	1
PF09451	ATG27	Autophagy-related protein 27	8	0
PF00831	Ribosomal_L29	Ribosomal L29 protein	8	0
PF00276	Ribosomal_L23	Ribosomal protein L23	8	0
PF03939	Ribosomal_L23eN	Ribosomal protein L23, N-terminal domain	8	0
PF01209	Ubie_methyltran	ubiE/COQ5 methyltransferase family	8	0
PF00088	Trefoil	Trefoil (P-type) domain	8	0
PF00702	Hydrolase	haloacid dehalogenase-like hydrolase	8	0
PF08450	SGL	SMP-30/Gluconolaconase/LRE-like region	8	0
PF13304	AAA_21	AAA domain	8	0
PF00487	FA_desaturase	Fatty acid desaturase	8	0
PF02174	IRS	PTB domain (IRS-1 type)	8	0
PF02450	LCAT	Lecithin:cholesterol acyltransferase	8	0
PF00111	Fer2	2Fe-2S iron-sulfur cluster binding domain	8	0
PF03131	bZIP_Maf	bZIP Maf transcription factor	8	0
PF13589	HATPase_c_3	Histidine kinase-, DNA gyrase B-, and HSP90-like ATPase	8	0
PF13738	Pyr_redox_3	Pyridine nucleotide-disulphide oxidoreductase	8	0
PF07687	M20_dimer	Peptidase dimerisation domain	8	0
PF00956	NAP	Nucleosome assembly protein (NAP)	8	0
PF05221	AdoHcyase	S-adenosyl-L-homocysteine hydrolase	8	0
PF00109	ketoacyl-synt	Beta-ketoacyl synthase, N-terminal domain	8	0
PF10302	DUF2407	DUF2407 ubiquitin-like domain	8	0
PF06628	Catalase-rel	Catalase-related immune-responsive	8	0
PF00319	SRF-TF	SRF-type transcription factor (DNA-binding and dimerisation domain)	8	0
PF02209	VHP	Villin headpiece domain	8	0
PF02516	STT3	Oligosaccharyl transferase STT3 subunit	8	0
PF01280	Ribosomal_L19e	Ribosomal protein L19e	8	0
PF04568	IATP	Mitochondrial ATPase inhibitor, IATP	8	0
PF13183	Fer4_8	4Fe-4S dicluster domain	8	0
PF00725	3HCDH	3-hydroxyacyl-CoA dehydrogenase, C-terminal domain	8	0
PF08022	FAD_binding_8	FAD-binding domain	8	0
PF00333	Ribosomal_S5	Ribosomal protein S5, N-terminal domain	8	0
PF03719	Ribosomal_S5_C	Ribosomal protein S5, C-terminal domain	8	0
PF00384	Molybdopterin	Molybdopterin oxidoreductase	8	0
PF01157	Ribosomal_L21e	Ribosomal protein L21e	8	0
PF01251	Ribosomal_S7e	Ribosomal protein S7e	8	0
PF02990	EMP70	Endomembrane protein 70	8	0
PF03130	HEAT_PBS	PBS lyase HEAT-like repeat	8	0
PF02852	Pyr_redox_dim	Pyridine nucleotide-disulphide oxidoreductase, dimerisation domain	8	0
PF07065	D123	D123	8	0
PF10455	BAR_2	Bin/amphiphysin/Rvs domain for vesicular trafficking	8	0
PF13474	SnoaL_3	SnoaL-like domain	8	0
PF03836	RasGAP_C	RasGAP C-terminus	8	0
PF08332	CaMKII_AD	Calcium/calmodulin dependent protein kinase II Association	8	0
PF01213	CAP_N	Adenylate cyclase associated (CAP) N terminal	8	0
PF01432	Peptidase_M3	Peptidase family M3	8	0
PF05827	ATP-synt_S1	Vacuolar ATP synthase subunit S1 (ATP6S1)	8	0
PF08621	RPAP1_N	RPAP1-like, N-terminal	8	0
PF14697	Fer4_21	4Fe-4S dicluster domain	8	0
PF13237	Fer4_10	4Fe-4S dicluster domain	7	3
PF02771	Acyl-CoA_dh_N	Acyl-CoA dehydrogenase, N-terminal domain	7	0
PF01423	LSM	LSM domain	7	0
PF02780	Transketolase_C	Transketolase, C-terminal domain	7	0
PF00053	Laminin_EGF	Laminin EGF-like (Domains III and V)	7	0
PF00612	IQ	IQ calmodulin-binding motif	7	0
PF00644	PARP	Poly(ADP-ribose) polymerase catalytic domain	7	0
PF00788	RA	Ras association (RalGDS/AF-6) domain	7	0
PF07707	BACK	BTB And C-terminal Kelch	7	0
PF13229	Beta_helix	Right handed beta helix region	7	0
PF14580	LRR_9	Leucine-rich repeat	7	0
PF00433	Pkinase_C	Protein kinase C terminal domain	7	0
PF00808	CBFD_NFYB_HMF	Histone-like transcription factor (CBF/NF-Y) and archaeal histone	7	0
PF02854	MIF4G	MIF4G domain	7	0
PF13409	GST_N_2	Glutathione S-transferase, N-terminal domain	7	0
PF13602	ADH_zinc_N_2	Zinc-binding dehydrogenase	7	0
PF00249	Myb_DNA-binding	Myb-like DNA-binding domain	7	0
PF00625	Guanylate_kin	Guanylate kinase	7	0
PF00535	Glycos_transf_2	Glycosyl transferase family 2	7	0
PF02141	DENN	DENN (AEX-3) domain	7	0
PF13641	Glyco_tranf_2_3	Glycosyltransferase like family 2	7	0
PF02412	TSP_3	Thrombospondin type 3 repeat	7	0
PF00364	Biotin_lipoyl	Biotin-requiring enzyme	7	0
PF00657	Lipase_GDSL	GDSL-like Lipase/Acylhydrolase	7	0
PF00780	CNH	CNH domain	7	0
PF02806	Alpha-amylase_C	Alpha amylase, C-terminal all-beta domain	7	0
PF10587	EF-1_beta_acid	Eukaryotic elongation factor 1 beta central acidic region	7	0
PF00181	Ribosomal_L2	Ribosomal Proteins L2, RNA binding domain	7	0
PF00274	Glycolytic	Fructose-bisphosphate aldolase class-I	7	0
PF08565	CDC37_M	Cdc37 Hsp90 binding domain	7	0
PF00235	Profilin	Profilin	7	0
PF03148	Tektin	Tektin family	7	0
PF12831	FAD_oxidored	FAD dependent oxidoreductase	7	0
PF00393	6PGD	6-phosphogluconate dehydrogenase, C-terminal domain	7	0
PF13292	DXP_synthase_N	1-deoxy-D-xylulose-5-phosphate synthase	7	0
PF03946	Ribosomal_L11_N	Ribosomal protein L11, N-terminal domain	7	0
PF00162	PGK	Phosphoglycerate kinase	7	0
PF00231	ATP-synt	ATP synthase	7	0
PF00670	AdoHcyase_NAD	S-adenosyl-L-homocysteine hydrolase, NAD binding domain	7	0
PF01284	MARVEL	Membrane-associating domain	7	0
PF02772	S-AdoMet_synt_M	S-adenosylmethionine synthetase, central domain	7	0
PF00237	Ribosomal_L22	Ribosomal protein L22p/L17e	7	0
PF02777	Sod_Fe_C	Iron/manganese superoxide dismutases, C-terminal domain	7	0
PF11978	MVP_shoulder	Shoulder domain	7	0
PF01247	Ribosomal_L35Ae	Ribosomal protein L35Ae	7	0
PF01294	Ribosomal_L13e	Ribosomal protein L13e	7	0
PF01599	Ribosomal_S27	Ribosomal protein S27a	7	0
PF05694	SBP56	56kDa selenium binding protein (SBP56)	7	0
PF03020	LEM	LEM domain	7	0
PF04916	Phospholip_B	Phospholipase B	7	0
PF03129	HGTP_anticodon	Anticodon binding domain	7	0
PF00970	FAD_binding_6	Oxidoreductase FAD-binding domain	7	0
PF13177	DNA_pol3_delta2	DNA polymerase III, delta subunit	7	0
PF01417	ENTH	ENTH domain	7	0
PF01557	FAA_hydrolase	Fumarylacetoacetate (FAA) hydrolase family	7	0
PF04832	SOUL	SOUL heme-binding protein	7	0
PF13949	ALIX_LYPXL_bnd	ALIX V-shaped domain binding to HIV	7	0
PF00285	Citrate_synt	Citrate synthase	7	0
PF01144	CoA_trans	Coenzyme A transferase	7	0
PF01153	Glypican	Glypican	7	0
PF01873	eIF-5_eIF-2B	Domain found in IF2B/IF5	7	0
PF12569	NARP1	NMDA receptor-regulated protein 1	7	0
PF13600	DUF4140	N-terminal domain of unknown function (DUF4140)	7	0
PF15288	zf-CCHC_6	Zinc knuckle	7	0
PF01056	Myc_N	Myc amino-terminal region	7	0
PF01063	Aminotran_4	Aminotransferase class IV	7	0
PF01106	NifU	NifU-like domain	7	0
PF03227	GILT	Gamma interferon inducible lysosomal thiol reductase (GILT)	7	0
PF03348	Serinc	Serine incorporator (Serinc)	7	0
PF03635	Vps35	Vacuolar protein sorting-associated protein 35	7	0
PF07994	NAD_binding_5	Myo-inositol-1-phosphate synthase	7	0
PF12837	Fer4_6	4Fe-4S binding domain	6	4
PF12678	zf-rbx1	RING-H2 zinc finger	6	2
PF00097	zf-C3HC4	Zinc finger, C3HC4 type (RING finger)	6	2
PF13445	zf-RING_UBOX	RING-type zinc-finger	6	1
PF00478	IMPDH	IMP dehydrogenase / GMP reductase domain	6	1
PF02770	Acyl-CoA_dh_M	Acyl-CoA dehydrogenase, middle domain	6	0
PF08028	Acyl-CoA_dh_2	Acyl-CoA dehydrogenase, C-terminal domain	6	0
PF00456	Transketolase_N	Transketolase, thiamine diphosphate binding domain	6	0
PF14541	TAXi_C	Xylanase inhibitor C-terminal	6	0
PF00083	Sugar_tr	Sugar (and other) transporter	6	0
PF00884	Sulfatase	Sulfatase	6	0
PF00632	HECT	HECT-domain (ubiquitin-transferase)	6	0
PF00617	RasGEF	RasGEF domain	6	0
PF00640	PID	Phosphotyrosine interaction domain (PTB/PID)	6	0
PF13207	AAA_17	AAA domain	6	0
PF00627	UBA	UBA/TS-N domain	6	0
PF01412	ArfGap	Putative GTPase activating protein for Arf	6	0
PF01823	MACPF	MAC/Perforin domain	6	0
PF00355	Rieske	Rieske [2Fe-2S] domain	6	0
PF00679	EFG_C	Elongation factor G C-terminus	6	0
PF13193	AMP-binding_C	AMP-binding enzyme C-terminal domain	6	0
PF03747	ADP_ribosyl_GH	ADP-ribosylglycohydrolase	6	0
PF00388	PI-PLC-X	Phosphatidylinositol-specific phospholipase C, X domain	6	0
PF03215	Rad17	Rad17 cell cycle checkpoint protein	6	0
PF04547	Anoctamin	Calcium-activated chloride channel	6	0
PF01299	Lamp	Lysosome-associated membrane glycoprotein (Lamp)	6	0
PF03114	BAR	BAR domain	6	0
PF00152	tRNA-synt_2	tRNA synthetases class II (D, K and N)	6	0
PF02892	zf-BED	BED zinc finger	6	0
PF13921	Myb_DNA-bind_6	Myb-like DNA-binding domain	6	0
PF00132	Hexapep	Bacterial transferase hexapeptide (six repeats)	6	0
PF01849	NAC	NAC domain	6	0
PF01496	V_ATPase_I	V-type ATPase 116kDa subunit family	6	0
PF08282	Hydrolase_3	haloacid dehalogenase-like hydrolase	6	0
PF04774	HABP4_PAI-RBP1	Hyaluronan / mRNA binding family	6	0
PF00344	SecY	SecY translocase	6	0
PF01027	Bax1-I	Inhibitor of apoptosis-promoting Bax1	6	0
PF01253	SUI1	Translation initiation factor SUI1	6	0
PF13669	Glyoxalase_4	Glyoxalase/Bleomycin resistance protein/Dioxygenase superfamily	6	0
PF07978	NIPSNAP	NIPSNAP	6	0
PF08079	Ribosomal_L30_N	Ribosomal L30 N-terminal domain	6	0
PF01134	GIDA	Glucose inhibited division protein A	6	0
PF03446	NAD_binding_2	NAD binding domain of 6-phosphogluconate dehydrogenase	6	0
PF00380	Ribosomal_S9	Ribosomal protein S9/S16	6	0
PF00177	Ribosomal_S7	Ribosomal protein S7p/S5e	6	0
PF00298	Ribosomal_L11	Ribosomal protein L11, RNA binding domain	6	0
PF06068	TIP49	TIP49 C-terminus	6	0
PF01287	eIF-5a	Eukaryotic elongation factor 5A hypusine, DNA-binding OB fold	6	0
PF00203	Ribosomal_S19	Ribosomal protein S19	6	0
PF00827	Ribosomal_L15e	Ribosomal L15	6	0
PF01158	Ribosomal_L36e	Ribosomal protein L36e	6	0
PF04758	Ribosomal_S30	Ribosomal protein S30	6	0
PF06140	Ifi-6-16	Interferon-induced 6-16 family	6	0
PF08071	RS4NT	RS4NT (NUC023) domain	6	0
PF08523	MBF1	Multiprotein bridging factor 1	6	0
PF01105	EMP24_GP25L	emp24/gp25L/p24 family/GOLD	6	0
PF03600	CitMHS	Citrate transporter	6	0
PF00198	2-oxoacid_dh	2-oxoacid dehydrogenases acyltransferase (catalytic domain)	6	0
PF01794	Ferric_reduct	Ferric reductase like transmembrane component	6	0
PF09279	EF-hand_like	Phosphoinositide-specific phospholipase C, efhand-like	6	0
PF00804	Syntaxin	Syntaxin	6	0
PF06456	Arfaptin	Arfaptin-like domain	6	0
PF08442	ATP-grasp_2	ATP-grasp domain	6	0
PF10644	Misat_Tub_SegII	Misato Segment II tubulin-like domain	6	0
PF00351	Biopterin_H	Biopterin-dependent aromatic amino acid hydroxylase	6	0
PF13620	CarboxypepD_reg	Carboxypeptidase regulatory-like domain	6	0
PF07676	PD40	WD40-like Beta Propeller Repeat	6	0
PF00163	Ribosomal_S4	Ribosomal protein S4/S9 N-terminal domain	6	0
PF01326	PPDK_N	Pyruvate phosphate dikinase, PEP/pyruvate binding domain	6	0
PF01575	MaoC_dehydratas	MaoC like domain	6	0
PF01991	vATP-synt_E	ATP synthase (E/31 kDa) subunit	6	0
PF02188	GoLoco	GoLoco motif	6	0
PF02201	SWIB	SWIB/MDM2 domain	6	0
PF02828	L27	L27 domain	6	0
PF04601	DUF569	Protein of unknown function (DUF569)	6	0
PF06957	COPI_C	Coatomer (COPI) alpha subunit C-terminus	6	0
PF14566	PTPlike_phytase	Inositol hexakisphosphate	6	0
PF00464	SHMT	Serine hydroxymethyltransferase	6	0
PF07721	TPR_4	Tetratricopeptide repeat	5	4
PF00037	Fer4	4Fe-4S binding domain	5	4
PF00704	Glyco_hydro_18	Glycosyl hydrolases family 18	5	2
PF06293	Kdo	Lipopolysaccharide kinase (Kdo/WaaP) family	5	1
PF01979	Amidohydro_1	Amidohydrolase family	5	1
PF13802	Gal_mutarotas_2	Galactose mutarotase-like	5	0
PF00173	Cyt-b5	Cytochrome b5-like Heme/Steroid binding domain	5	0
PF00128	Alpha-amylase	Alpha amylase, catalytic domain	5	0
PF13472	Lipase_GDSL_2	GDSL-like Lipase/Acylhydrolase family	5	0
PF01825	GPS	Latrophilin/CL-1-like GPS domain	5	0
PF04851	ResIII	Type III restriction enzyme, res subunit	5	0
PF01501	Glyco_transf_8	Glycosyl transferase family 8	5	0
PF00454	PI3_PI4_kinase	Phosphatidylinositol 3- and 4-kinase	5	0
PF00615	RGS	Regulator of G protein signaling domain	5	0
PF00641	zf-RanBP	Zn-finger in Ran binding protein and others	5	0
PF01494	FAD_binding_3	FAD binding domain	5	0
PF13091	PLDc_2	PLD-like domain	5	0
PF02822	Antistasin	Antistasin family	5	0
PF01061	ABC2_membrane	ABC-2 type transporter	5	0
PF04389	Peptidase_M28	Peptidase family M28	5	0
PF00989	PAS	PAS fold	5	0
PF00264	Tyrosinase	Common central domain of tyrosinase	5	0
PF01428	zf-AN1	AN1-like Zinc finger	5	0
PF00385	Chromo	Chromo (CHRromatin Organisation MOdifier) domain	5	0
PF00406	ADK	Adenylate kinase	5	0
PF00569	ZZ	Zinc finger, ZZ type	5	0
PF01569	PAP2	PAP2 superfamily	5	0
PF00326	Peptidase_S9	Prolyl oligopeptidase family	5	0
PF01335	DED	Death effector domain	5	0
PF05920	Homeobox_KN	Homeobox KN domain	5	0
PF01699	Na_Ca_ex	Sodium/calcium exchanger protein	5	0
PF00680	RdRP_1	RNA dependent RNA polymerase	5	0
PF00565	SNase	Staphylococcal nuclease homologue	5	0
PF02136	NTF2	Nuclear transport factor 2 (NTF2) domain	5	0
PF00736	EF1_GNE	EF-1 guanine nucleotide exchange domain	5	0
PF06747	CHCH	CHCH domain	5	0
PF09066	B2-adapt-app_C	Beta2-adaptin appendage, C-terminal sub-domain	5	0
PF00910	RNA_helicase	RNA helicase	5	0
PF00838	TCTP	Translationally controlled tumour protein	5	0
PF02736	Myosin_N	Myosin N-terminal SH3-like domain	5	0
PF00647	EF1G	Elongation factor 1 gamma, conserved domain	5	0
PF00719	Pyrophosphatase	Inorganic pyrophosphatase	5	0
PF01929	Ribosomal_L14e	Ribosomal protein L14	5	0
PF02747	PCNA_C	Proliferating cell nuclear antigen, C-terminal domain	5	0
PF02737	3HCDH_N	3-hydroxyacyl-CoA dehydrogenase, NAD binding domain	5	0
PF00411	Ribosomal_S11	Ribosomal protein S11	5	0
PF00883	Peptidase_M17	Cytosol aminopeptidase family, catalytic domain	5	0
PF01459	Porin_3	Eukaryotic porin	5	0
PF01588	tRNA_bind	Putative tRNA binding domain	5	0
PF00238	Ribosomal_L14	Ribosomal protein L14p/L23e	5	0
PF00673	Ribosomal_L5_C	ribosomal L5P family C-terminus	5	0
PF00034	Cytochrom_C	Cytochrome c	5	0
PF00121	TIM	Triosephosphate isomerase	5	0
PF00224	PK	Pyruvate kinase, barrel domain	5	0
PF01090	Ribosomal_S19e	Ribosomal protein S19e	5	0
PF01655	Ribosomal_L32e	Ribosomal protein L32	5	0
PF02167	Cytochrom_C1	Cytochrome C1 family	5	0
PF02910	Succ_DH_flav_C	Fumarate reductase flavoprotein C-term	5	0
PF03271	EB1	EB1-like C-terminal motif	5	0
PF03501	S10_plectin	Plectin/S10 domain	5	0
PF05091	eIF-3_zeta	Eukaryotic translation initiation factor 3 subunit 7 (eIF-3)	5	0
PF07830	PP2C_C	Protein serine/threonine phosphatase 2C, C-terminal domain	5	0
PF00066	Notch	LNR domain	5	0
PF00534	Glycos_transf_1	Glycosyl transferases group 1	5	0
PF00550	PP-binding	Phosphopantetheine attachment site	5	0
PF01336	tRNA_anti-codon	OB-fold nucleic acid binding domain	5	0
PF01749	IBB	Importin beta binding domain	5	0
PF03200	Glyco_hydro_63	Mannosyl oligosaccharide glucosidase	5	0
PF05577	Peptidase_S28	Serine carboxypeptidase S28	5	0
PF08441	Integrin_alpha2	Integrin alpha	5	0
PF10585	UBA_e1_thiolCys	Ubiquitin-activating enzyme active site	5	0
PF01434	Peptidase_M41	Peptidase family M41	5	0
PF02040	ArsB	Arsenical pump membrane protein	5	0
PF02089	Palm_thioest	Palmitoyl protein thioesterase	5	0
PF08337	Plexin_cytopl	Plexin cytoplasmic RasGAP domain	5	0
PF13793	Pribosyltran_N	N-terminal domain of ribose phosphate pyrophosphokinase	5	0
PF14572	Pribosyl_synth	Phosphoribosyl synthetase-associated domain	5	0
PF03127	GAT	GAT domain	5	0
PF03486	HI0933_like	HI0933-like protein	5	0
PF08031	BBE	Berberine and berberine like	5	0
PF08127	Propeptide_C1	Peptidase family C1 propeptide	5	0
PF13598	DUF4139	Domain of unknown function (DUF4139)	5	0
PF14602	Hexapep_2	Hexapeptide repeat of succinyl-transferase	5	0
PF00479	G6PD_N	Glucose-6-phosphate dehydrogenase, NAD binding domain	5	0
PF01466	Skp1	Skp1 family, dimerisation domain	5	0
PF01642	MM_CoA_mutase	Methylmalonyl-CoA mutase	5	0
PF02781	G6PD_C	Glucose-6-phosphate dehydrogenase, C-terminal domain	5	0
PF05002	SGS	SGS domain	5	0
PF08512	Rtt106	Histone chaperone Rttp106-like	5	0
PF09731	Mitofilin	Mitochondrial inner membrane protein	5	0
PF13908	Shisa	Wnt and FGF inhibitory regulator	5	0
PF14772	NYD-SP28	Sperm tail	5	0
PF00342	PGI	Phosphoglucose isomerase	5	0
PF01521	Fe-S_biosyn	Iron-sulphur cluster biosynthesis	5	0
PF01592	NifU_N	NifU-like N terminal domain	5	0
PF01658	Inos-1-P_synth	Myo-inositol-1-phosphate synthase	5	0
PF03995	Inhibitor_I36	Peptidase inhibitor family I36	5	0
PF04209	HgmA	homogentisate 1,2-dioxygenase	5	0
PF05495	zf-CHY	CHY zinc finger	5	0
PF05817	Ribophorin_II	Oligosaccharyltransferase subunit Ribophorin II	5	0
PF09268	Clathrin-link	Clathrin, heavy-chain linker	5	0
PF12680	SnoaL_2	SnoaL-like domain	5	0
PF14619	SnAC	Snf2-ATP coupling, chromatin remodelling complex	5	0
PF14833	NAD_binding_11	NAD-binding of NADP-dependent 3-hydroxyisobutyrate dehydrogenase	5	0
PF01048	PNP_UDP_1	Phosphorylase superfamily	4	2
PF00230	MIP	Major intrinsic protein	4	1
PF01661	Macro	Macro domain	4	1
PF00784	MyTH4	MyTH4 domain	4	1
PF07527	Hairy_orange	Hairy Orange	4	0
PF01734	Patatin	Patatin-like phospholipase	4	0
PF08069	Ribosomal_S13_N	Ribosomal S13/S15 N-terminal domain	4	0
PF00312	Ribosomal_S15	Ribosomal protein S15	4	0
PF00656	Peptidase_C14	Caspase domain	4	0
PF00130	C1_1	Phorbol esters/diacylglycerol binding domain (C1 domain)	4	0
PF00566	RabGAP-TBC	Rab-GTPase-TBC domain	4	0
PF00176	SNF2_N	SNF2 family N-terminal domain	4	0
PF00439	Bromodomain	Bromodomain	4	0
PF02719	Polysacc_synt_2	Polysaccharide biosynthesis protein	4	0
PF04321	RmlD_sub_bind	RmlD substrate binding domain	4	0
PF14704	DERM	Dermatopontin	4	0
PF00202	Aminotran_3	Aminotransferase class-III	4	0
PF02738	Ald_Xan_dh_C2	Molybdopterin-binding domain of aldehyde dehydrogenase	4	0
PF00350	Dynamin_N	Dynamin family	4	0
PF00362	Integrin_beta	Integrin, beta chain	4	0
PF02181	FH2	Formin Homology 2 Domain	4	0
PF03810	IBN_N	Importin-beta N-terminal domain	4	0
PF01915	Glyco_hydro_3_C	Glycosyl hydrolase family 3 C-terminal domain	4	0
PF01946	Thi4	Thi4 family	4	0
PF02815	MIR	MIR domain	4	0
PF04564	U-box	U-box domain	4	0
PF04130	Spc97_Spc98	Spc97 / Spc98 family	4	0
PF00613	PI3Ka	Phosphoinositide 3-kinase family, accessory domain (PIK domain)	4	0
PF03171	2OG-FeII_Oxy	2OG-Fe(II) oxygenase superfamily	4	0
PF00156	Pribosyltran	Phosphoribosyl transferase domain	4	0
PF00850	Hist_deacetyl	Histone deacetylase domain	4	0
PF03403	PAF-AH_p_II	Platelet-activating factor acetylhydrolase, isoform II	4	0
PF08725	Integrin_b_cyt	Integrin beta cytoplasmic domain	4	0
PF00635	Motile_Sperm	MSP (Major sperm protein) domain	4	0
PF01403	Sema	Sema domain	4	0
PF00690	Cation_ATPase_N	Cation transporter/ATPase, N-terminus	4	0
PF01323	DSBA	DSBA-like thioredoxin domain	4	0
PF02629	CoA_binding	CoA binding domain	4	0
PF01124	MAPEG	MAPEG family	4	0
PF01431	Peptidase_M13	Peptidase family M13	4	0
PF00549	Ligase_CoA	CoA-ligase	4	0
PF00150	Cellulase	Cellulase (glycosyl hydrolase family 5)	4	0
PF08726	EFhand_Ca_insen	Ca2+ insensitive EF hand	4	0
PF00694	Aconitase_C	Aconitase C-terminal domain	4	0
PF02046	COX6A	Cytochrome c oxidase subunit VIa	4	0
PF00031	Cystatin	Cystatin domain	4	0
PF01086	Clathrin_lg_ch	Clathrin light chain	4	0
PF01777	Ribosomal_L27e	Ribosomal L27e protein family	4	0
PF13442	Cytochrome_CBB3	Cytochrome C oxidase, cbb3-type, subunit III	4	0
PF13012	MitMem_reg	Maintenance of mitochondrial structure and function	4	0
PF00756	Esterase	Putative esterase	4	0
PF00996	GDI	GDP dissociation inhibitor	4	0
PF02115	Rho_GDI	RHO protein GDP dissociation inhibitor	4	0
PF02121	IP_trans	Phosphatidylinositol transfer protein	4	0
PF00821	PEPCK	Phosphoenolpyruvate carboxykinase	4	0
PF00255	GSHPx	Glutathione peroxidase	4	0
PF03297	Ribosomal_S25	S25 ribosomal protein	4	0
PF00213	OSCP	ATP synthase delta (OSCP) subunit	4	0
PF00366	Ribosomal_S17	Ribosomal protein S17	4	0
PF00935	Ribosomal_L44	Ribosomal protein L44	4	0
PF01198	Ribosomal_L31e	Ribosomal protein L31e	4	0
PF01776	Ribosomal_L22e	Ribosomal L22e protein family	4	0
PF03345	DDOST_48kD	Oligosaccharyltransferase 48 kDa subunit beta	4	0
PF05719	GPP34	Golgi phosphoprotein 3 (GPP34)	4	0
PF00282	Pyridoxal_deC	Pyridoxal-dependent decarboxylase conserved domain	4	0
PF00387	PI-PLC-Y	Phosphatidylinositol-specific phospholipase C, Y domain	4	0
PF00568	WH1	WH1 domain	4	0
PF03456	uDENN	uDENN domain	4	0
PF04193	PQ-loop	PQ loop repeat	4	0
PF04998	RNA_pol_Rpb1_5	RNA polymerase Rpb1, domain 5	4	0
PF13019	Telomere_Sde2	Telomere stability and silencing	4	0
PF00733	Asn_synthase	Asparagine synthase	4	0
PF03637	Mob1_phocein	Mob1/phocein family	4	0
PF04427	Brix	Brix domain	4	0
PF00562	RNA_pol_Rpb2_6	RNA polymerase Rpb2, domain 6	4	0
PF01652	IF4E	Eukaryotic initiation factor 4E	4	0
PF15409	PH_8	Pleckstrin homology domain	4	0
PF01221	Dynein_light	Dynein light chain type 1	4	0
PF02886	LBP_BPI_CETP_C	LBP / BPI / CETP family, C-terminal domain	4	0
PF12352	V-SNARE_C	Snare region anchored in the vesicle membrane C-terminus	4	0
PF12800	Fer4_4	4Fe-4S binding domain	4	0
PF00110	wnt	wnt family	4	0
PF00458	WHEP-TRS	WHEP-TRS domain	4	0
PF00959	Phage_lysozyme	Phage lysozyme	4	0
PF01182	Glucosamine_iso	Glucosamine-6-phosphate isomerases/6-phosphogluconolactonase	4	0
PF01262	AlaDh_PNT_C	Alanine dehydrogenase/PNT, C-terminal domain	4	0
PF01263	Aldose_epim	Aldose 1-epimerase	4	0
PF08487	VIT	Vault protein inter-alpha-trypsin domain	4	0
PF01411	tRNA-synt_2c	tRNA synthetases class II (A)	4	0
PF07726	AAA_3	ATPase family associated with various cellular activities (AAA)	4	0
PF09294	Interfer-bind	Interferon-alpha/beta receptor, fibronectin type III	4	0
PF00120	Gln-synt_C	Glutamine synthetase, catalytic domain	4	0
PF00365	PFK	Phosphofructokinase	4	0
PF01187	MIF	Macrophage migration inhibitory factor (MIF)	4	0
PF01404	Ephrin_lbd	Ephrin receptor ligand binding domain	4	0
PF02755	RPEL	RPEL repeat	4	0
PF11938	DUF3456	TLR4 regulator and MIR-interacting MSAP	4	0
PF12265	CAF1C_H4-bd	Histone-binding protein RBBP4 or subunit C of CAF1 complex	4	0
PF13844	Glyco_transf_41	Glycosyl transferase family 41	4	0
PF00728	Glyco_hydro_20	Glycosyl hydrolase family 20, catalytic domain	4	0
PF01139	RtcB	tRNA-splicing ligase RtcB	4	0
PF01406	tRNA-synt_1e	tRNA synthetases class I (C) catalytic domain	4	0
PF04912	Dynamitin	Dynamitin	4	0
PF09818	ABC_ATPase	Predicted ATPase of the ABC class	4	0
PF10456	BAR_3_WASP_bdg	WASP-binding domain of Sorting nexin protein	4	0
PF13506	Glyco_transf_21	Glycosyl transferase family 21	4	0
PF00810	ER_lumen_recept	ER lumen protein retaining receptor	4	0
PF01918	Alba	Alba	4	0
PF02630	SCO1-SenC	SCO1/SenC	4	0
PF02887	PK_C	Pyruvate kinase, alpha/beta domain	4	0
PF02978	SRP_SPB	Signal peptide binding domain	4	0
PF03223	V-ATPase_C	V-ATPase subunit C	4	0
PF03332	PMM	Eukaryotic phosphomannomutase	4	0
PF04045	P34-Arc	Arp2/3 complex, 34 kD subunit p34-Arc	4	0
PF04104	DNA_primase_lrg	Eukaryotic and archaeal DNA primase, large subunit	4	0
PF04121	Nup84_Nup100	Nuclear pore protein 84 / 107	4	0
PF04515	Choline_transpo	Plasma-membrane choline transporter	4	0
PF04880	NUDE_C	NUDE protein, C-terminal conserved region	4	0
PF06202	GDE_C	Amylo-alpha-1,6-glucosidase	4	0
PF09058	L27_1	L27_1	4	0
PF09280	XPC-binding	XPC-binding domain	4	0
PF10252	PP28	Casein kinase substrate phosphoprotein PP28	4	0
PF10516	SHNi-TPR	SHNi-TPR	4	0
PF11608	Limkain-b1	Limkain b1	4	0
PF12465	Pr_beta_C	Proteasome beta subunits C terminal	4	0
PF13454	NAD_binding_9	FAD-NAD(P)-binding	4	0
PF14671	DSPn	Dual specificity protein phosphatase, N-terminal half	4	0
PF02915	Rubrerythrin	Rubrerythrin	4	0
PF05172	Nup35_RRM	Nup53/35/40-type RNA recognition motif	4	0
PF13867	SAP30_Sin3_bdg	Sin3 binding region of histone deacetylase complex subunit SAP30	4	0
PF13306	LRR_5	Leucine rich repeats (6 copies)	3	3
PF09342	DUF1986	Domain of unknown function (DUF1986)	3	2
PF00520	Ion_trans	Ion transport protein	3	2
PF00651	BTB	BTB/POZ domain	3	2
PF05649	Peptidase_M13_N	Peptidase family M13	3	1
PF02668	TauD	Taurine catabolism dioxygenase TauD, TfdA family	3	1
PF02055	Glyco_hydro_30	O-Glycosyl hydrolase family 30	3	1
PF01490	Aa_trans	Transmembrane amino acid transporter protein	3	0
PF00581	Rhodanese	Rhodanese-like domain	3	0
PF00648	Peptidase_C2	Calpain family cysteine protease	3	0
PF12850	Metallophos_2	Calcineurin-like phosphoesterase superfamily domain	3	0
PF03179	V-ATPase_G	Vacuolar (H+)-ATPase G subunit	3	0
PF00567	TUDOR	Tudor domain	3	0
PF01442	Apolipoprotein	Apolipoprotein A1/A4/E domain	3	0
PF12937	F-box-like	F-box-like	3	0
PF02809	UIM	Ubiquitin interaction motif	3	0
PF00583	Acetyltransf_1	Acetyltransferase (GNAT) family	3	0
PF00650	CRAL_TRIO	CRAL/TRIO domain	3	0
PF01457	Peptidase_M8	Leishmanolysin	3	0
PF00291	PALP	Pyridoxal-phosphate dependent enzyme	3	0
PF01135	PCMT	Protein-L-isoaspartate(D-aspartate) O-methyltransferase (PCMT)	3	0
PF13238	AAA_18	AAA domain	3	0
PF02574	S-methyl_trans	Homocysteine S-methyltransferase	3	0
PF00334	NDK	Nucleoside diphosphate kinase	3	0
PF02170	PAZ	PAZ domain	3	0
PF01239	PPTA	Protein prenyltransferase alpha subunit repeat	3	0
PF01694	Rhomboid	Rhomboid family	3	0
PF00619	CARD	Caspase recruitment domain	3	0
PF01554	MatE	MatE	3	0
PF00616	RasGAP	GTPase-activator protein for Ras-like GTPase	3	0
PF13520	AA_permease_2	Amino acid permease	3	0
PF13419	HAD_2	Haloacid dehalogenase-like hydrolase	3	0
PF00136	DNA_pol_B	DNA polymerase family B	3	0
PF11969	DcpS_C	Scavenger mRNA decapping enzyme C-term binding	3	0
PF13673	Acetyltransf_10	Acetyltransferase (GNAT) domain	3	0
PF00933	Glyco_hydro_3	Glycosyl hydrolase family 3 N terminal domain	3	0
PF00957	Synaptobrevin	Synaptobrevin	3	0
PF02065	Melibiase	Melibiase	3	0
PF03104	DNA_pol_B_exo1	DNA polymerase family B, exonuclease domain	3	0
PF02466	Tim17	Tim17/Tim22/Tim23/Pmp24 family	3	0
PF06462	Hyd_WA	Propeller	3	0
PF13469	Sulfotransfer_3	Sulfotransferase family	3	0
PF02936	COX4	Cytochrome c oxidase subunit IV	3	0
PF04110	APG12	Ubiquitin-like autophagy protein Apg12	3	0
PF07915	PRKCSH	Glucosidase II beta subunit-like protein	3	0
PF00316	FBPase	Fructose-1-6-bisphosphatase	3	0
PF01381	HTH_3	Helix-turn-helix	3	0
PF13534	Fer4_17	4Fe-4S dicluster domain	3	0
PF13560	HTH_31	Helix-turn-helix domain	3	0
PF15353	HECA	Headcase protein family homologue	3	0
PF09360	zf-CDGSH	Iron-binding zinc finger CDGSH type	3	0
PF01920	Prefoldin_2	Prefoldin subunit	3	0
PF02171	Piwi	Piwi domain	3	0
PF05347	Complex1_LYR	Complex 1 protein (LYR family)	3	0
PF14492	EFG_II	Elongation Factor G, domain II	3	0
PF00306	ATP-synt_ab_C	ATP synthase alpha/beta chain, C terminal domain	3	0
PF00684	DnaJ_CXXCXGXG	DnaJ central domain	3	0
PF04784	DUF547	Protein of unknown function, DUF547	3	0
PF13378	MR_MLE_C	Enolase C-terminal domain-like	3	0
PF00081	Sod_Fe_N	Iron/manganese superoxide dismutases, alpha-hairpin domain	3	0
PF00113	Enolase_C	Enolase, C-terminal TIM barrel domain	3	0
PF00164	Ribosom_S12_S23	Ribosomal protein S12/S23	3	0
PF01778	Ribosomal_L28e	Ribosomal L28e protein family	3	0
PF03234	CDC37_N	Cdc37 N terminal kinase binding	3	0
PF04139	Rad9	Rad9	3	0
PF08736	FA	FERM adjacent (FA)	3	0
PF00166	Cpn10	Chaperonin 10 Kd subunit	3	0
PF00416	Ribosomal_S13	Ribosomal protein S13/S18	3	0
PF00833	Ribosomal_S17e	Ribosomal S17	3	0
PF00915	Calici_coat	Calicivirus coat protein	3	0
PF01127	Sdh_cyt	Succinate dehydrogenase/Fumarate reductase transmembrane subunit	3	0
PF01215	COX5B	Cytochrome c oxidase subunit Vb	3	0
PF02284	COX5A	Cytochrome c oxidase subunit Va	3	0
PF02453	Reticulon	Reticulon	3	0
PF02823	ATP-synt_DE_N	ATP synthase, Delta/Epsilon chain, beta-sandwich domain	3	0
PF02921	UCR_TM	Ubiquinol cytochrome reductase transmembrane region	3	0
PF03952	Enolase_N	Enolase, N-terminal domain	3	0
PF04062	P21-Arc	ARP2/3 complex ARPC3 (21 kDa) subunit	3	0
PF04699	P16-Arc	ARP2/3 complex 16 kDa subunit (p16-Arc)	3	0
PF05404	TRAP-delta	Translocon-associated protein, delta subunit precursor (TRAP-delta)	3	0
PF05405	Mt_ATP-synt_B	Mitochondrial ATP synthase B chain precursor (ATP-synt_B)	3	0
PF05511	ATP-synt_F6	Mitochondrial ATP synthase coupling factor 6	3	0
PF05873	Mt_ATP-synt_D	ATP synthase D chain, mitochondrial (ATP5H)	3	0
PF07742	BTG	BTG family	3	0
PF08075	NOPS	NOPS (NUC059) domain	3	0
PF05517	p25-alpha	p25-alpha	3	0
PF05783	DLIC	Dynein light intermediate chain (DLIC)	3	0
PF00579	tRNA-synt_1b	tRNA synthetases class I (W and Y)	3	0
PF01230	HIT	HIT domain	3	0
PF01039	Carboxyl_trans	Carboxyl transferase domain	3	0
PF01074	Glyco_hydro_38	Glycosyl hydrolases family 38 N-terminal domain	3	0
PF01477	PLAT	PLAT/LH2 domain	3	0
PF02274	Amidinotransf	Amidinotransferase	3	0
PF03097	BRO1	BRO1-like domain	3	0
PF03782	AMOP	AMOP domain	3	0
PF08445	FR47	FR47-like protein	3	0
PF00654	Voltage_CLC	Voltage gated chloride channel	3	0
PF02197	RIIa	Regulatory subunit of type II PKA R-subunit	3	0
PF02267	Rib_hydrolayse	ADP-ribosyl cyclase	3	0
PF03024	Folate_rec	Folate receptor family	3	0
PF03770	IPK	Inositol polyphosphate kinase	3	0
PF03807	F420_oxidored	NADP oxidoreductase coenzyme F420-dependent	3	0
PF04030	ALO	D-arabinono-1,4-lactone oxidase	3	0
PF04042	DNA_pol_E_B	DNA polymerase alpha/epsilon subunit B	3	0
PF05978	UNC-93	Ion channel regulatory protein UNC-93	3	0
PF08544	GHMP_kinases_C	GHMP kinases C terminal	3	0
PF01067	Calpain_III	Calpain large subunit, domain III	3	0
PF03645	Tctex-1	Tctex-1 family	3	0
PF00389	2-Hacid_dh	D-isomer specific 2-hydroxyacid dehydrogenase, catalytic domain	3	0
PF00875	DNA_photolyase	DNA photolyase	3	0
PF01030	Recep_L_domain	Receptor L domain	3	0
PF01965	DJ-1_PfpI	DJ-1/PfpI family	3	0
PF02114	Phosducin	Phosducin	3	0
PF03567	Sulfotransfer_2	Sulfotransferase family	3	0
PF05222	AlaDh_PNT_N	Alanine dehydrogenase/PNT, N-terminal domain	3	0
PF05406	WGR	WGR domain	3	0
PF08150	FerB	FerB (NUC096) domain	3	0
PF08151	FerI	FerI (NUC094) domain	3	0
PF08542	Rep_fac_C	Replication factor C C-terminal domain	3	0
PF12906	RINGv	RING-variant domain	3	0
PF13434	K_oxygenase	L-lysine 6-monooxygenase (NADPH-requiring)	3	0
PF13640	2OG-FeII_Oxy_3	2OG-Fe(II) oxygenase superfamily	3	0
PF02423	OCD_Mu_crystall	Ornithine cyclodeaminase/mu-crystallin family	3	0
PF02785	Biotin_carb_C	Biotin carboxylase C-terminal domain	3	0
PF13426	PAS_9	PAS domain	3	0
PF00206	Lyase_1	Lyase	3	0
PF00762	Ferrochelatase	Ferrochelatase	3	0
PF00834	Ribul_P_3_epim	Ribulose-phosphate 3 epimerase family	3	0
PF00939	Na_sulph_symp	Sodium:sulfate symporter transmembrane region	3	0
PF03134	TB2_DP1_HVA22	TB2/DP1, HVA22 family	3	0
PF03987	Autophagy_act_C	Autophagocytosis associated protein, active-site domain	3	0
PF05191	ADK_lid	Adenylate kinase, active site lid	3	0
PF05195	AMP_N	Aminopeptidase P, N-terminal domain	3	0
PF05478	Prominin	Prominin	3	0
PF06544	DUF1115	Protein of unknown function (DUF1115)	3	0
PF07002	Copine	Copine	3	0
PF08603	CAP_C	Adenylate cyclase associated (CAP) C terminal	3	0
PF09090	MIF4G_like_2	MIF4G like	3	0
PF09286	Pro-kuma_activ	Pro-kumamolisin, activation domain	3	0
PF12474	PKK	Polo kinase kinase	3	0
PF13173	AAA_14	AAA domain	3	0
PF13603	tRNA-synt_1_2	Leucyl-tRNA synthetase, Domain 2	3	0
PF13838	Clathrin_H_link	Clathrin-H-link	3	0
PF14775	NYD-SP28_assoc	Sperm tail C-terminal domain	3	0
PF02233	PNTB	NAD(P) transhydrogenase beta subunit	3	0
PF03222	Trp_Tyr_perm	Tryptophan/tyrosine permease family	3	0
PF03731	Ku_N	Ku70/Ku80 N-terminal alpha/beta domain	3	0
PF13578	Methyltransf_24	Methyltransferase domain	3	0
PF13774	Longin	Regulated-SNARE-like domain	3	0
PF00346	Complex1_49kDa	Respiratory-chain NADH dehydrogenase, 49 Kd subunit	3	0
PF00372	Hemocyanin_M	Hemocyanin, copper containing domain	3	0
PF00857	Isochorismatase	Isochorismatase family	3	0
PF01115	F_actin_cap_B	F-actin capping protein, beta subunit	3	0
PF01150	GDA1_CD39	GDA1/CD39 (nucleoside phosphatase) family	3	0
PF01267	F-actin_cap_A	F-actin capping protein alpha subunit	3	0
PF01650	Peptidase_C13	Peptidase C13 family	3	0
PF02296	Alpha_adaptin_C	Alpha adaptin AP2, C-terminal domain	3	0
PF02359	CDC48_N	Cell division protein 48 (CDC48), N-terminal domain	3	0
PF02833	DHHA2	DHHA2 domain	3	0
PF02867	Ribonuc_red_lgC	Ribonucleotide reductase, barrel domain	3	0
PF03261	CDK5_activator	Cyclin-dependent kinase 5 activator protein	3	0
PF03398	Ist1	Regulator of Vps4 activity in the MVB pathway	3	0
PF03727	Hexokinase_2	Hexokinase	3	0
PF04091	Sec15	Exocyst complex subunit Sec15-like	3	0
PF04845	PurA	PurA ssDNA and RNA-binding protein	3	0
PF04855	SNF5	SNF5 / SMARCB1 / INI1	3	0
PF05038	Cytochrom_B558a	Cytochrome Cytochrome b558 alpha-subunit	3	0
PF06384	ICAT	Beta-catenin-interacting protein ICAT	3	0
PF07888	CALCOCO1	Calcium binding and coiled-coil domain (CALCOCO1) like	3	0
PF08059	SEP	SEP domain	3	0
PF08375	Rpn3_C	Proteasome regulatory subunit C-terminal	3	0
PF08390	TRAM1	TRAM1-like protein	3	0
PF08572	PRP3	pre-mRNA processing factor 3 (PRP3)	3	0
PF08644	SPT16	FACT complex subunit (SPT16/CDC68)	3	0
PF08752	COP-gamma_platf	Coatomer gamma subunit appendage platform subdomain	3	0
PF09127	Leuk-A4-hydro_C	Leukotriene A4 hydrolase, C-terminal	3	0
PF09270	BTD	Beta-trefoil DNA-binding domain	3	0
PF09298	FAA_hydrolase_N	Fumarylacetoacetase N-terminal	3	0
PF09429	Wbp11	WW domain binding protein 11	3	0
PF09431	DUF2013	Protein of unknown function (DUF2013)	3	0
PF09454	Vps23_core	Vps23 core domain	3	0
PF09507	CDC27	DNA polymerase subunit Cdc27	3	0
PF09606	Med15	ARC105 or Med15 subunit of Mediator complex non-fungal	3	0
PF11029	DAZAP2	DAZ associated protein 2 (DAZAP2)	3	0
PF11698	V-ATPase_H_C	V-ATPase subunit H	3	0
PF12329	TMF_DNA_bd	TATA element modulatory factor 1 DNA binding	3	0
PF12619	MCM2_N	Mini-chromosome maintenance protein 2	3	0
PF12719	Cnd3	Nuclear condensing complex subunits, C-term domain	3	0
PF13510	Fer2_4	2Fe-2S iron-sulfur cluster binding domain	3	0
PF14802	TMEM192	TMEM192 family	3	0
PF14932	HAUS-augmin3	HAUS augmin-like complex subunit 3	3	0
PF15313	HEXIM	Hexamethylene bis-acetamide-inducible protein	3	0
PF15519	RBM39linker	linker between RRM2 and RRM3 domains in RBM39 protein	3	0
PF02057	Glyco_hydro_59	Glycosyl hydrolase family 59	3	0
PF15477	SMAP	Small acidic protein family	3	0
PF12838	Fer4_7	4Fe-4S dicluster domain	2	3
PF13187	Fer4_9	4Fe-4S dicluster domain	2	3
PF03188	Cytochrom_B561	Eukaryotic cytochrome b561	2	3
PF02140	Gal_Lectin	Galactose binding lectin domain	2	2
PF00208	ELFV_dehydrog	Glutamate/Leucine/Phenylalanine/Valine dehydrogenase	2	2
PF13923	zf-C3HC4_2	Zinc finger, C3HC4 type (RING finger)	2	1
PF00294	PfkB	pfkB family carbohydrate kinase	2	1
PF14752	RBP_receptor	Retinol binding protein receptor	2	1
PF02878	PGM_PMM_I	Phosphoglucomutase/phosphomannomutase, alpha/beta/alpha domain I	2	1
PF03109	ABC1	ABC1 family	2	1
PF03723	Hemocyanin_C	Hemocyanin, ig-like domain	2	1
PF02825	WWE	WWE domain	2	0
PF00452	Bcl-2	Apoptosis regulator proteins, Bcl-2 family	2	0
PF00853	Runt	Runt domain	2	0
PF05729	NACHT	NACHT domain	2	0
PF01212	Beta_elim_lyase	Beta-eliminating lyase	2	0
PF10274	ParcG	Parkin co-regulated protein	2	0
PF03370	CBM_21	Putative phosphatase regulatory subunit	2	0
PF04734	Ceramidase_alk	Neutral/alkaline non-lysosomal ceramidase	2	0
PF01436	NHL	NHL repeat	2	0
PF00002	7tm_2	7 transmembrane receptor (Secretin family)	2	0
PF00621	RhoGEF	RhoGEF domain	2	0
PF00646	F-box	F-box domain	2	0
PF12756	zf-C2H2_2	C2H2 type zinc-finger (2 copies)	2	0
PF14634	zf-RING_5	zinc-RING finger domain	2	0
PF00685	Sulfotransfer_1	Sulfotransferase domain	2	0
PF00755	Carn_acyltransf	Choline/Carnitine o-acyltransferase	2	0
PF00878	CIMR	Cation-independent mannose-6-phosphate receptor repeat	2	0
PF12781	AAA_9	ATP-binding dynein motor region D5	2	0
PF00001	7tm_1	7 transmembrane receptor (rhodopsin family)	2	0
PF01163	RIO1	RIO1 family	2	0
PF00300	His_Phos_1	Histidine phosphatase superfamily (branch 1)	2	0
PF02421	FeoB_N	Ferrous iron transport protein B	2	0
PF00622	SPRY	SPRY domain	2	0
PF13574	Reprolysin_2	Metallo-peptidase family M12B Reprolysin-like	2	0
PF13688	Reprolysin_5	Metallo-peptidase family M12	2	0
PF00892	EamA	EamA-like transporter family	2	0
PF13582	Reprolysin_3	Metallo-peptidase family M12B Reprolysin-like	2	0
PF01562	Pep_M12B_propep	Reprolysin family propeptide	2	0
PF01852	START	START domain	2	0
PF13508	Acetyltransf_7	Acetyltransferase (GNAT) domain	2	0
PF00233	PDEase_I	3'5'-cyclic nucleotide phosphodiesterase	2	0
PF02784	Orn_Arg_deC_N	Pyridoxal-dependent decarboxylase, pyridoxal binding domain	2	0
PF00962	A_deaminase	Adenosine/AMP deaminase	2	0
PF08416	PTB	Phosphotyrosine-binding domain	2	0
PF00753	Lactamase_B	Metallo-beta-lactamase superfamily	2	0
PF00278	Orn_DAP_Arg_deC	Pyridoxal-dependent decarboxylase, C-terminal sheet domain	2	0
PF13716	CRAL_TRIO_2	Divergent CRAL/TRIO domain	2	0
PF07859	Abhydrolase_3	alpha/beta hydrolase fold	2	0
PF00575	S1	S1 RNA binding domain	2	0
PF01532	Glyco_hydro_47	Glycosyl hydrolase family 47	2	0
PF00324	AA_permease	Amino acid permease	2	0
PF05185	PRMT5	PRMT5 arginine-N-methyltransferase	2	0
PF08239	SH3_3	Bacterial SH3 domain	2	0
PF02535	Zip	ZIP Zinc transporter	2	0
PF02889	Sec63	Sec63 Brl domain	2	0
PF00995	Sec1	Sec1 family	2	0
PF01408	GFO_IDH_MocA	Oxidoreductase family, NAD-binding Rossmann fold	2	0
PF13458	Peripla_BP_6	Periplasmic binding protein	2	0
PF00638	Ran_BP1	RanBP1 domain	2	0
PF02263	GBP	Guanylate-binding protein, N-terminal domain	2	0
PF03283	PAE	Pectinacetylesterase	2	0
PF07731	Cu-oxidase_2	Multicopper oxidase	2	0
PF12656	G-patch_2	DExH-box splicing factor binding site	2	0
PF01596	Methyltransf_3	O-methyltransferase	2	0
PF02434	Fringe	Fringe-like	2	0
PF05470	eIF-3c_N	Eukaryotic translation initiation factor 3 subunit 8 N-terminus	2	0
PF05960	DUF885	Bacterial protein of unknown function (DUF885)	2	0
PF10559	Plug_translocon	Plug domain of Sec61p	2	0
PF01712	dNK	Deoxynucleoside kinase	2	0
PF03781	FGE-sulfatase	Sulfatase-modifying factor enzyme 1	2	0
PF01731	Arylesterase	Arylesterase	2	0
PF01012	ETF	Electron transfer flavoprotein domain	2	0
PF00705	PCNA_N	Proliferating cell nuclear antigen, N-terminal domain	2	0
PF01058	Oxidored_q6	NADH ubiquinone oxidoreductase, 20 Kd subunit	2	0
PF01146	Caveolin	Caveolin	2	0
PF02198	SAM_PNT	Sterile alpha motif (SAM)/Pointed domain	2	0
PF05018	DUF667	Protein of unknown function (DUF667)	2	0
PF00887	ACBP	Acyl CoA binding protein	2	0
PF01176	eIF-1a	Translation initiation factor 1A / IF-1	2	0
PF01261	AP_endonuc_2	Xylose isomerase-like TIM barrel	2	0
PF04146	YTH	YT521-B-like domain	2	0
PF00329	Complex1_30kDa	Respiratory-chain NADH dehydrogenase, 30 Kd subunit	2	0
PF00410	Ribosomal_S8	Ribosomal protein S8	2	0
PF01016	Ribosomal_L27	Ribosomal L27 protein	2	0
PF01257	2Fe-2S_thioredx	Thioredoxin-like [2Fe-2S] ferredoxin	2	0
PF01283	Ribosomal_S26e	Ribosomal protein S26e	2	0
PF02109	DAD	DAD family	2	0
PF03896	TRAP_alpha	Translocon-associated protein (TRAP), alpha subunit	2	0
PF04716	ETC_C1_NDUFA5	ETC complex I subunit conserved region	2	0
PF04718	ATP-synt_G	Mitochondrial ATP synthase g subunit	2	0
PF05456	eIF_4EBP	Eukaryotic translation initiation factor 4E binding protein (EIF4EBP)	2	0
PF05753	TRAP_beta	Translocon-associated protein beta (TRAPB)	2	0
PF05821	NDUF_B8	NADH-ubiquinone oxidoreductase ASHI subunit (CI-ASHI or NDUFB8)	2	0
PF06479	Ribonuc_2-5A	Ribonuclease 2-5A	2	0
PF07074	TRAP-gamma	Translocon-associated protein, gamma subunit (TRAP-gamma)	2	0
PF07946	DUF1682	Protein of unknown function (DUF1682)	2	0
PF09173	eIF2_C	Initiation factor eIF2 gamma, C terminal	2	0
PF12353	eIF3g	Eukaryotic translation initiation factor 3 subunit G	2	0
PF13085	Fer2_3	2Fe-2S iron-sulfur cluster binding domain	2	0
PF07748	Glyco_hydro_38C	Glycosyl hydrolases family 38 C-terminal domain	2	0
PF00117	GATase	Glutamine amidotransferase class-I	2	0
PF00790	VHS	VHS domain	2	0
PF00794	PI3K_rbd	PI3-kinase family, ras-binding domain	2	0
PF02225	PA	PA domain	2	0
PF02837	Glyco_hydro_2_N	Glycosyl hydrolases family 2, sugar binding domain	2	0
PF03455	dDENN	dDENN domain	2	0
PF06371	Drf_GBD	Diaphanous GTPase-binding Domain	2	0
PF14555	UBA_4	UBA-like domain	2	0
PF00320	GATA	GATA zinc finger	2	0
PF01008	IF-2B	Initiation factor 2 subunit family	2	0
PF03820	Mtc	Tricarboxylate carrier	2	0
PF10277	Frag1	Frag1/DRAM/Sfk1 family	2	0
PF13692	Glyco_trans_1_4	Glycosyl transferases group 1	2	0
PF00337	Gal-bind_lectin	Galactoside-binding lectin	2	0
PF00703	Glyco_hydro_2	Glycosyl hydrolases family 2	2	0
PF01193	RNA_pol_L	RNA polymerase Rpb3/Rpb11 dimerisation domain	2	0
PF01762	Galactosyl_T	Galactosyltransferase	2	0
PF02996	Prefoldin	Prefoldin subunit	2	0
PF05843	Suf	Suppressor of forked protein (Suf)	2	0
PF10409	PTEN_C2	C2 domain of PTEN tumour-suppressor protein	2	0
PF10503	Esterase_phd	Esterase PHB depolymerase	2	0
PF15508	NAAA-beta	beta subunit of N-acylethanolamine-hydrolyzing acid amidase	2	0
PF00752	XPG_N	XPG N-terminal domain	2	0
PF01409	tRNA-synt_2d	tRNA synthetases class II core domain (F)	2	0
PF02275	CBAH	Linear amide C-N hydrolases, choloylglycine hydrolase family	2	0
PF05916	Sld5	GINS complex protein	2	0
PF06337	DUSP	DUSP domain	2	0
PF00144	Beta-lactamase	Beta-lactamase	2	0
PF00749	tRNA-synt_1c	tRNA synthetases class I (E and Q), catalytic domain	2	0
PF01041	DegT_DnrJ_EryC1	DegT/DnrJ/EryC1/StrS aminotransferase family	2	0
PF01088	Peptidase_C12	Ubiquitin carboxyl-terminal hydrolase, family 1	2	0
PF02824	TGS	TGS domain	2	0
PF02877	PARP_reg	Poly(ADP-ribose) polymerase, regulatory domain	2	0
PF03178	CPSF_A	CPSF A subunit region	2	0
PF03441	FAD_binding_7	FAD binding domain of DNA photolyase	2	0
PF04051	TRAPP	Transport protein particle (TRAPP) component	2	0
PF04117	Mpv17_PMP22	Mpv17 / PMP22 family	2	0
PF04909	Amidohydro_2	Amidohydrolase	2	0
PF07744	SPOC	SPOC domain	2	0
PF07973	tRNA_SAD	Threonyl and Alanyl tRNA synthetase second additional domain	2	0
PF07986	TBCC	Tubulin binding cofactor C	2	0
PF08719	DUF1768	Domain of unknown function (DUF1768)	2	0
PF10367	Vps39_2	Vacuolar sorting protein 39 domain 2	2	0
PF13521	AAA_28	AAA domain	2	0
PF13522	GATase_6	Glutamine amidotransferase domain	2	0
PF13537	GATase_7	Glutamine amidotransferase domain	2	0
PF13757	VIT_2	Vault protein inter-alpha-trypsin domain	2	0
PF13806	Rieske_2	Rieske-like [2Fe-2S] domain	2	0
PF00445	Ribonuclease_T2	Ribonuclease T2 family	2	0
PF02817	E3_binding	e3 binding domain	2	0
PF03366	YEATS	YEATS family	2	0
PF04157	EAP30	EAP30/Vps36 family	2	0
PF00448	SRP54	SRP54-type protein, GTPase domain	2	0
PF00465	Fe-ADH	Iron-containing alcohol dehydrogenase	2	0
PF00485	PRK	Phosphoribulokinase / Uridine kinase family	2	0
PF00639	Rotamase	PPIC-type PPIASE domain	2	0
PF00659	POLO_box	POLO box duplicated region	2	0
PF00701	DHDPS	Dihydrodipicolinate synthetase family	2	0
PF01031	Dynamin_M	Dynamin central region	2	0
PF01161	PBP	Phosphatidylethanolamine-binding protein	2	0
PF01273	LBP_BPI_CETP	LBP / BPI / CETP family, N-terminal domain	2	0
PF01507	PAPS_reduct	Phosphoadenosine phosphosulfate reductase family	2	0
PF01841	Transglut_core	Transglutaminase-like superfamily	2	0
PF01937	DUF89	Protein of unknown function DUF89	2	0
PF01956	DUF106	Integral membrane protein DUF106	2	0
PF02966	DIM1	Mitosis protein DIM1	2	0
PF03259	Robl_LC7	Roadblock/LC7 domain	2	0
PF03483	B3_4	B3/4 domain	2	0
PF03643	Vps26	Vacuolar protein sorting-associated protein 26	2	0
PF03950	tRNA-synt_1c_C	tRNA synthetases class I (E and Q), anti-codon binding domain	2	0
PF04046	PSP	PSP	2	0
PF04144	SCAMP	SCAMP family	2	0
PF04511	DER1	Der1-like family	2	0
PF04560	RNA_pol_Rpb2_7	RNA polymerase Rpb2, domain 7	2	0
PF06087	Tyr-DNA_phospho	Tyrosyl-DNA phosphodiesterase	2	0
PF08646	Rep_fac-A_C	Replication factor-A C terminal domain	2	0
PF10243	MIP-T3	Microtubule-binding protein MIP-T3	2	0
PF12456	hSac2	Inositol phosphatase	2	0
PF13549	ATP-grasp_5	ATP-grasp domain	2	0
PF13616	Rotamase_3	PPIC-type PPIASE domain	2	0
PF13656	RNA_pol_L_2	RNA polymerase Rpb3/Rpb11 dimerisation domain	2	0
PF14050	Nudc_N	N-terminal conserved domain of Nudc.	2	0
PF14721	AIF_C	Apoptosis-inducing factor, mitochondrion-associated, C-term	2	0
PF01842	ACT	ACT domain	2	0
PF02219	MTHFR	Methylenetetrahydrofolate reductase	2	0
PF03517	Voldacs	Regulator of volume decrease after cellular swelling	2	0
PF03909	BSD	BSD domain	2	0
PF04733	Coatomer_E	Coatomer epsilon subunit	2	0
PF04893	Yip1	Yip1 domain	2	0
PF05592	Bac_rhamnosid	Bacterial alpha-L-rhamnosidase	2	0
PF07159	DUF1394	Protein of unknown function (DUF1394)	2	0
PF11492	Dicistro_VP4	Cricket paralysis virus, VP4	2	0
PF12481	DUF3700	Aluminium induced protein	2	0
PF13862	BCIP	p21-C-terminal region-binding protein	2	0
PF00075	RNase_H	RNase H	2	0
PF00268	Ribonuc_red_sm	Ribonucleotide reductase, small chain	2	0
PF00349	Hexokinase_1	Hexokinase	2	0
PF00542	Ribosomal_L12	Ribosomal protein L7/L12 C-terminal domain	2	0
PF00840	Glyco_hydro_7	Glycosyl hydrolase family 7	2	0
PF00886	Ribosomal_S16	Ribosomal protein S16	2	0
PF00977	His_biosynth	Histidine biosynthesis protein	2	0
PF01020	Ribosomal_L40e	Ribosomal L40e family	2	0
PF01113	DapB_N	Dihydrodipicolinate reductase, N-terminus	2	0
PF01125	G10	G10 protein	2	0
PF01196	Ribosomal_L17	Ribosomal protein L17	2	0
PF01214	CK_II_beta	Casein kinase II regulatory subunit	2	0
PF01419	Jacalin	Jacalin-like lectin domain	2	0
PF01454	MAGE	MAGE family	2	0
PF01512	Complex1_51K	Respiratory-chain NADH dehydrogenase 51 Kd subunit	2	0
PF01597	GCV_H	Glycine cleavage H-protein	2	0
PF01907	Ribosomal_L37e	Ribosomal protein L37e	2	0
PF01940	DUF92	Integral membrane protein DUF92	2	0
PF01990	ATP-synt_F	ATP synthase (F/14-kDa) subunit	2	0
PF01992	vATP-synt_AC39	ATP synthase (C/AC39) subunit	2	0
PF02922	CBM_48	Carbohydrate-binding module 48 (Isoamylase N-terminal domain)	2	0
PF02933	CDC48_2	Cell division protein 48 (CDC48), domain 2	2	0
PF03066	Nucleoplasmin	Nucleoplasmin	2	0
PF03095	PTPA	Phosphotyrosyl phosphate activator (PTPA) protein	2	0
PF03358	FMN_red	NADPH-dependent FMN reductase	2	0
PF03378	CAS_CSE1	CAS/CSE protein, C-terminus	2	0
PF03439	Spt5-NGN	Early transcription elongation factor of RNA pol II, NGN section	2	0
PF03485	Arg_tRNA_synt_N	Arginyl tRNA synthetase N terminal domain	2	0
PF03661	UPF0121	Uncharacterised protein family (UPF0121)	2	0
PF03800	Nuf2	Nuf2 family	2	0
PF04054	Not1	CCR4-Not complex component, Not1	2	0
PF04095	NAPRTase	Nicotinate phosphoribosyltransferase (NAPRTase) family	2	0
PF04201	TPD52	Tumour protein D52 family	2	0
PF04614	Pex19	Pex19 protein family	2	0
PF04799	Fzo_mitofusin	fzo-like conserved region	2	0
PF04841	Vps16_N	Vps16, N-terminal region	2	0
PF04906	Tweety	Tweety	2	0
PF05064	Nsp1_C	Nsp1-like C-terminal region	2	0
PF05529	Bap31	B-cell receptor-associated protein 31-like	2	0
PF05608	DUF778	Protein of unknown function (DUF778)	2	0
PF05673	DUF815	Protein of unknown function (DUF815)	2	0
PF06840	DUF1241	Protein of unknown function (DUF1241)	2	0
PF07051	OCIA	Ovarian carcinoma immunoreactive antigen (OCIA)	2	0
PF07502	MANEC	MANEC domain	2	0
PF07524	Bromo_TP	Bromodomain associated	2	0
PF07718	Coatamer_beta_C	Coatomer beta C-terminal region	2	0
PF07815	Abi_HHR	Abl-interactor HHR	2	0
PF07850	Renin_r	Renin receptor-like protein	2	0
PF07969	Amidohydro_3	Amidohydrolase family	2	0
PF08074	CHDCT2	CHDCT2 (NUC038) domain	2	0
PF08324	PUL	PUL domain	2	0
PF08511	COQ9	COQ9	2	0
PF08539	HbrB	HbrB-like	2	0
PF08623	TIP120	TATA-binding protein interacting (TIP20)	2	0
PF08766	DEK_C	DEK C terminal domain	2	0
PF08784	RPA_C	Replication protein A C terminal	2	0
PF08920	SF3b1	Splicing factor 3B subunit 1	2	0
PF08953	DUF1899	Domain of unknown function (DUF1899)	2	0
PF09174	Maf1	Maf1 regulator	2	0
PF09271	LAG1-DNAbind	LAG1, DNA binding	2	0
PF09531	Ndc1_Nup	Nucleoporin protein Ndc1-Nup	2	0
PF09755	DUF2046	Uncharacterized conserved protein H4 (DUF2046)	2	0
PF10046	BLOC1_2	Biogenesis of lysosome-related organelles complex-1 subunit 2	2	0
PF10176	DUF2370	Protein of unknown function (DUF2370)	2	0
PF10187	Nefa_Nip30_N	N-terminal domain of NEFA-interacting nuclear protein NIP30	2	0
PF10188	Oscp1	Organic solute transport protein 1	2	0
PF10208	Armet	Degradation arginine-rich protein for mis-folding	2	0
PF10231	DUF2315	Uncharacterised conserved protein (DUF2315)	2	0
PF10241	KxDL	Uncharacterized conserved protein	2	0
PF10266	Strumpellin	Hereditary spastic paraplegia protein strumpellin	2	0
PF10394	Hat1_N	Histone acetyl transferase HAT1 N-terminus	2	0
PF10406	TAF8_C	Transcription factor TFIID complex subunit 8 C-term	2	0
PF10568	Tom37	Outer mitochondrial membrane transport complex protein	2	0
PF10589	NADH_4Fe-4S	NADH-ubiquinone oxidoreductase-F iron-sulfur binding region	2	0
PF12134	PRP8_domainIV	PRP8 domain IV core	2	0
PF12295	Symplekin_C	Symplekin tight junction protein C terminal	2	0
PF12701	LSM14	Scd6-like Sm domain	2	0
PF12999	PRKCSH-like	Glucosidase II beta subunit-like	2	0
PF13336	AcetylCoA_hyd_C	Acetyl-CoA hydrolase/transferase C-terminal domain	2	0
PF13420	Acetyltransf_4	Acetyltransferase (GNAT) domain	2	0
PF13452	MaoC_dehydrat_N	N-terminal half of MaoC dehydratase	2	0
PF13664	DUF4149	Domain of unknown function (DUF4149)	2	0
PF14304	CSTF_C	Transcription termination and cleavage factor C-terminal	2	0
PF14327	CSTF2_hinge	Hinge domain of cleavage stimulation factor subunit 2	2	0
PF14438	SM-ATX	Ataxin 2 SM domain	2	0
PF14533	USP7_C2	Ubiquitin-specific protease C-terminal	2	0
PF14699	hGDE_N	N-terminal domain from the human glycogen debranching enzyme	2	0
PF14701	hDGE_amylase	glucanotransferase domain of human glycogen debranching enzyme	2	0
PF14702	hGDE_central	central domain of human glycogen debranching enzyme	2	0
PF14719	PID_2	Phosphotyrosine interaction domain (PTB/PID)	2	0
PF14745	WASH-7_N	WASH complex subunit 7, N-terminal	2	0
PF14796	AP3B1_C	Clathrin-adaptor complex-3 beta-1 subunit C-terminal	2	0
PF14966	DNA_repr_REX1B	DNA repair REX1-B	2	0
PF15065	NCU-G1	Lysosomal transcription factor, NCU-G1	2	0
PF15454	LAMTOR	Late endosomal/lysosomal adaptor and MAPK and MTOR activator	2	0
PF02272	DHHA1	DHHA1 domain	2	0
PF02970	TBCA	Tubulin binding cofactor A	2	0
PF03879	Cgr1	Cgr1 family	2	0
PF07834	RanGAP1_C	RanGAP1 C-terminal domain	2	0
PF08276	PAN_2	PAN-like domain	2	0
PF12210	Hrs_helical	Hepatocyte growth factor-regulated tyrosine kinase substrate	2	0
PF13866	zf-SAP30	SAP30 zinc-finger	2	0
PF12455	Dynactin	Dynein associated protein	1	3
PF07534	TLD	TLD	1	2
PF15410	PH_9	Pleckstrin homology domain	1	2
PF01619	Pro_dh	Proline dehydrogenase	1	2
PF00856	SET	SET domain	1	1
PF00667	FAD_binding_1	FAD binding domain	1	1
PF00854	PTR2	POT family	1	1
PF14310	Fn3-like	Fibronectin type III-like domain	1	1
PF04145	Ctr	Ctr copper transporter family	1	1
PF04116	FA_hydroxylase	Fatty acid hydroxylase superfamily	1	1
PF02812	ELFV_dehydrog_N	Glu/Leu/Phe/Val dehydrogenase, dimerisation domain	1	1
PF03665	UPF0172	Uncharacterised protein family (UPF0172)	1	1
PF01118	Semialdhyde_dh	Semialdehyde dehydrogenase, NAD binding domain	1	0
PF00019	TGF_beta	Transforming growth factor beta like domain	1	0
PF13423	UCH_1	Ubiquitin carboxyl-terminal hydrolase	1	0
PF04997	RNA_pol_Rpb1_1	RNA polymerase Rpb1, domain 1	1	0
PF01764	Lipase_3	Lipase (class 3)	1	0
PF02353	CMAS	Mycolic acid cyclopropane synthetase	1	0
PF13481	AAA_25	AAA domain	1	0
PF02142	MGS	MGS-like domain	1	0
PF00643	zf-B_box	B-box zinc finger	1	0
PF00917	MATH	MATH domain	1	0
PF03372	Exo_endo_phos	Endonuclease/Exonuclease/phosphatase family	1	0
PF05699	Dimer_Tnp_hAT	hAT family C-terminal dimerisation region	1	0
PF12777	MT	Microtubule-binding stalk of dynein motor	1	0
PF12698	ABC2_membrane_3	ABC-2 family transporter protein	1	0
PF12775	AAA_7	P-loop containing dynein motor region D3	1	0
PF00293	NUDIX	NUDIX domain	1	0
PF01585	G-patch	G-patch domain	1	0
PF01663	Phosphodiest	Type I phosphodiesterase / nucleotide pyrophosphatase	1	0
PF00610	DEP	Domain found in Dishevelled, Egl-10, and Pleckstrin (DEP)	1	0
PF06325	PrmA	Ribosomal protein L11 methyltransferase (PrmA)	1	0
PF03221	HTH_Tnp_Tc5	Tc5 transposase DNA-binding domain	1	0
PF00178	Ets	Ets-domain	1	0
PF02338	OTU	OTU-like cysteine protease	1	0
PF01529	zf-DHHC	DHHC palmitoyltransferase	1	0
PF00211	Guanylate_cyc	Adenylate and Guanylate cyclase catalytic domain	1	0
PF04408	HA2	Helicase associated domain (HA2)	1	0
PF01553	Acyltransferase	Acyltransferase	1	0
PF02146	SIR2	Sir2 family	1	0
PF07717	OB_NTP_bind	Oligonucleotide/oligosaccharide-binding (OB)-fold	1	0
PF03151	TPT	Triose-phosphate Transporter family	1	0
PF00618	RasGEF_N	RasGEF N-terminal motif	1	0
PF01151	ELO	GNS1/SUR4 family	1	0
PF00258	Flavodoxin_1	Flavodoxin	1	0
PF02037	SAP	SAP domain	1	0
PF01421	Reprolysin	Reprolysin (M12B) family zinc metalloprotease	1	0
PF01138	RNase_PH	3' exoribonuclease family, domain 1	1	0
PF12706	Lactamase_B_2	Beta-lactamase superfamily domain	1	0
PF01697	Glyco_transf_92	Glycosyltransferase family 92	1	0
PF04055	Radical_SAM	Radical SAM superfamily	1	0
PF00781	DAGK_cat	Diacylglycerol kinase catalytic domain	1	0
PF00888	Cullin	Cullin family	1	0
PF00999	Na_H_Exchanger	Sodium/hydrogen exchanger family	1	0
PF01369	Sec7	Sec7 domain	1	0
PF00339	Arrestin_N	Arrestin (or S-antigen), N-terminal domain	1	0
PF01437	PSI	Plexin repeat	1	0
PF13903	Claudin_2	PMP-22/EMP/MP20/Claudin tight junction	1	0
PF02260	FATC	FATC domain	1	0
PF13965	SID-1_RNA_chan	dsRNA-gated channel SID-1	1	0
PF00394	Cu-oxidase	Multicopper oxidase	1	0
PF00483	NTP_transferase	Nucleotidyl transferase	1	0
PF02709	Glyco_transf_7C	N-terminal domain of galactosyltransferase	1	0
PF13851	GAS	Growth-arrest specific micro-tubule binding	1	0
PF00135	COesterase	Carboxylesterase family	1	0
PF01704	UDPGP	UTP--glucose-1-phosphate uridylyltransferase	1	0
PF02449	Glyco_hydro_42	Beta-galactosidase	1	0
PF01084	Ribosomal_S18	Ribosomal protein S18	1	0
PF01583	APS_kinase	Adenylylsulphate kinase	1	0
PF01676	Metalloenzyme	Metalloenzyme superfamily	1	0
PF01747	ATP-sulfurylase	ATP-sulfurylase	1	0
PF06071	YchF-GTPase_C	Protein of unknown function (DUF933)	1	0
PF09440	eIF3_N	eIF3 subunit 6 N terminal domain	1	0
PF09728	Taxilin	Myosin-like coiled-coil protein	1	0
PF10515	APP_amyloid	beta-amyloid precursor protein C-terminus	1	0
PF12901	SUZ-C	SUZ-C motif	1	0
PF14617	CMS1	U3-containing 90S pre-ribosomal complex subunit	1	0
PF08447	PAS_3	PAS fold	1	0
PF01053	Cys_Met_Meta_PP	Cys/Met metabolism PLP-dependent enzyme	1	0
PF03464	eRF1_2	eRF1 domain 2	1	0
PF13015	PRKCSH_1	Glucosidase II beta subunit-like protein	1	0
PF13911	AhpC-TSA_2	AhpC/TSA antioxidant enzyme	1	0
PF03465	eRF1_3	eRF1 domain 3	1	0
PF05186	Dpy-30	Dpy-30 motif	1	0
PF04261	Dyp_perox	Dyp-type peroxidase family	1	0
PF00105	zf-C4	Zinc finger, C4 type (two domains)	1	0
PF01603	B56	Protein phosphatase 2A regulatory B subunit (B56 family)	1	0
PF02144	Rad1	Repair protein Rad1/Rec1/Rad17	1	0
PF05071	NDUFA12	NADH ubiquinone oxidoreductase subunit NDUFA12	1	0
PF00586	AIRS	AIR synthase related protein, N-terminal domain	1	0
PF02064	MAS20	MAS20 protein import receptor	1	0
PF02271	UCR_14kD	Ubiquinol-cytochrome C reductase complex 14kD subunit	1	0
PF02769	AIRS_C	AIR synthase related protein, C-terminal domain	1	0
PF04683	Proteasom_Rpn13	Proteasome complex subunit Rpn13 ubiquitin receptor	1	0
PF04800	ETC_C1_NDUFA4	ETC complex I subunit conserved region	1	0
PF05328	CybS	CybS	1	0
PF05348	UMP1	Proteasome maturation factor UMP1	1	0
PF06110	DUF953	Eukaryotic protein of unknown function (DUF953)	1	0
PF08003	Methyltransf_9	Protein of unknown function (DUF1698)	1	0
PF08152	GUCT	GUCT (NUC152) domain	1	0
PF08560	DUF1757	Protein of unknown function (DUF1757)	1	0
PF10249	NDUFB10	NADH-ubiquinone oxidoreductase subunit 10	1	0
PF11027	DUF2615	Protein of unknown function (DUF2615)	1	0
PF12424	ATP_Ca_trans_C	Plasma membrane calcium transporter ATPase C terminal	1	0
PF13607	Succ_CoA_lig	Succinyl-CoA ligase like flavodoxin domain	1	0
PF15228	DAP	Death-associated protein	1	0
PF04281	Tom22	Mitochondrial import receptor subunit Tom22	1	0
PF06212	GRIM-19	GRIM-19 protein	1	0
PF09412	XendoU	Endoribonuclease XendoU	1	0
PF10206	WRW	Mitochondrial F1F0-ATP synthase, subunit f	1	0
PF14942	Muted	Organelle biogenesis, Muted-like protein	1	0
PF07732	Cu-oxidase_3	Multicopper oxidase	1	0
PF08423	Rad51	Rad51	1	0
PF00288	GHMP_kinases_N	GHMP kinases N terminal domain	1	0
PF00653	BIR	Inhibitor of Apoptosis domain	1	0
PF01207	Dus	Dihydrouridine synthase (Dus)	1	0
PF01425	Amidase	Amidase	1	0
PF01805	Surp	Surp module	1	0
PF02544	Steroid_dh	3-oxo-5-alpha-steroid 4-dehydrogenase	1	0
PF02836	Glyco_hydro_2_C	Glycosyl hydrolases family 2, TIM barrel domain	1	0
PF03031	NIF	NLI interacting factor-like phosphatase	1	0
PF06017	Myosin_TH1	Myosin tail	1	0
PF06367	Drf_FH3	Diaphanous FH3 Domain	1	0
PF08711	Med26	TFIIS helical bundle-like domain	1	0
PF10557	Cullin_Nedd8	Cullin protein neddylation domain	1	0
PF14707	Sulfatase_C	C-terminal region of aryl-sulfatase	1	0
PF03061	4HBT	Thioesterase superfamily	1	0
PF04577	DUF563	Protein of unknown function (DUF563)	1	0
PF05401	NodS	Nodulation protein S (NodS)	1	0
PF14008	Metallophos_C	Iron/zinc purple acid phosphatase-like protein C	1	0
PF00795	CN_hydrolase	Carbon-nitrogen hydrolase	1	0
PF01476	LysM	LysM domain	1	0
PF01504	PIP5K	Phosphatidylinositol-4-phosphate 5-Kinase	1	0
PF01756	ACOX	Acyl-CoA oxidase	1	0
PF02492	cobW	CobW/HypB/UreG, nucleotide-binding domain	1	0
PF02894	GFO_IDH_MocA_C	Oxidoreductase family, C-terminal alpha/beta domain	1	0
PF03166	MH2	MH2 domain	1	0
PF05057	DUF676	Putative serine esterase (DUF676)	1	0
PF05743	UEV	UEV domain	1	0
PF07701	HNOBA	Heme NO binding associated	1	0
PF07883	Cupin_2	Cupin domain	1	0
PF08704	GCD14	tRNA methyltransferase complex GCD14 subunit	1	0
PF09261	Alpha-mann_mid	Alpha mannosidase, middle domain	1	0
PF10607	CLTH	CTLH/CRA C-terminal to LisH motif domain	1	0
PF10996	Beta-Casp	Beta-Casp domain	1	0
PF13350	Y_phosphatase3	Tyrosine phosphatase family	1	0
PF14461	Prok-E2_B	Prokaryotic E2 family B	1	0
PF15102	TMEM154	TMEM154 protein family	1	0
PF00867	XPG_I	XPG I-region	1	0
PF04563	RNA_pol_Rpb2_1	RNA polymerase beta subunit	1	0
PF08964	Crystall_3	Beta/Gamma crystallin	1	0
PF10240	DUF2464	Protein of unknown function (DUF2464)	1	0
PF14593	PH_3	PH domain	1	0
PF14836	Ubiquitin_3	Ubiquitin-like domain	1	0
PF14938	SNAP	Soluble NSF attachment protein, SNAP	1	0
PF00141	peroxidase	Peroxidase	1	0
PF00623	RNA_pol_Rpb1_2	RNA polymerase Rpb1, domain 2	1	0
PF00779	BTK	BTK motif	1	0
PF00786	PBD	P21-Rho-binding domain	1	0
PF01019	G_glu_transpept	Gamma-glutamyltranspeptidase	1	0
PF01042	Ribonuc_L-PSP	Endoribonuclease L-PSP	1	0
PF01137	RTC	RNA 3'-terminal phosphate cyclase	1	0
PF01798	Nop	Putative snoRNA binding domain	1	0
PF03016	Exostosin	Exostosin family	1	0
PF03177	Nucleoporin_C	Non-repetitive/WGA-negative nucleoporin C-terminal	1	0
PF04000	Sas10_Utp3	Sas10/Utp3/C1D family	1	0
PF04565	RNA_pol_Rpb2_3	RNA polymerase Rpb2, domain 3	1	0
PF04840	Vps16_C	Vps16, C-terminal region	1	0
PF04983	RNA_pol_Rpb1_3	RNA polymerase Rpb1, domain 3	1	0
PF07521	RMMBL	RNA-metabolising metallo-beta-lactamase	1	0
PF10433	MMS1_N	Mono-functional DNA-alkylating methyl methanesulfonate N-term	1	0
PF12130	DUF3585	Protein of unknown function (DUF3585)	1	0
PF14464	Prok-JAB	Prokaryotic homologs of the JAB domain	1	0
PF01231	IDO	Indoleamine 2,3-dioxygenase	1	0
PF01488	Shikimate_DH	Shikimate / quinate 5-dehydrogenase	1	0
PF02845	CUE	CUE domain	1	0
PF07162	B9-C2	Ciliary basal body-associated, B9 protein	1	0
PF12804	NTP_transf_3	MobA-like NTP transferase domain	1	0
PF00104	Hormone_recep	Ligand-binding domain of nuclear hormone receptor	1	0
PF00154	RecA	recA bacterial DNA recombination protein	1	0
PF00205	TPP_enzyme_M	Thiamine pyrophosphate enzyme, central domain	1	0
PF00919	UPF0004	Uncharacterized protein family UPF0004	1	0
PF00975	Thioesterase	Thioesterase domain	1	0
PF01000	RNA_pol_A_bac	RNA polymerase Rpb3/RpoA insert domain	1	0
PF01180	DHO_dh	Dihydroorotate dehydrogenase	1	0
PF01222	ERG4_ERG24	Ergosterol biosynthesis ERG4/ERG24 family	1	0
PF01472	PUA	PUA domain	1	0
PF01571	GCV_T	Aminomethyltransferase folate-binding domain	1	0
PF02135	zf-TAZ	TAZ zinc finger	1	0
PF02269	TFIID-18kDa	Transcription initiation factor IID, 18kD subunit	1	0
PF02310	B12-binding	B12 binding domain	1	0
PF02403	Seryl_tRNA_N	Seryl-tRNA synthetase N-terminal domain	1	0
PF02735	Ku	Ku70/Ku80 beta-barrel domain	1	0
PF03152	UFD1	Ubiquitin fusion degradation protein UFD1	1	0
PF03556	Cullin_binding	Cullin binding	1	0
PF03641	Lysine_decarbox	Possible lysine decarboxylase	1	0
PF03796	DnaB_C	DnaB-like helicase C terminal domain	1	0
PF04153	NOT2_3_5	NOT2 / NOT3 / NOT5 family	1	0
PF04177	TAP42	TAP42-like family	1	0
PF04777	Evr1_Alr	Erv1 / Alr family	1	0
PF05041	Pecanex_C	Pecanex protein (C-terminus)	1	0
PF05047	L51_S25_CI-B8	Mitochondrial ribosomal protein L51 / S25 / CI-B8 domain	1	0
PF05189	RTC_insert	RNA 3'-terminal phosphate cyclase (RTC), insert domain	1	0
PF05731	TROVE	TROVE domain	1	0
PF06032	DUF917	Protein of unknown function (DUF917)	1	0
PF06480	FtsH_ext	FtsH Extracellular	1	0
PF06814	Lung_7-TM_R	Lung seven transmembrane receptor	1	0
PF07019	Rab5ip	Rab5-interacting protein (Rab5ip)	1	0
PF07286	DUF1445	Protein of unknown function (DUF1445)	1	0
PF07562	NCD3G	Nine Cysteines Domain of family 3 GPCR	1	0
PF07683	CobW_C	Cobalamin synthesis protein cobW C-terminal domain	1	0
PF08156	NOP5NT	NOP5NT (NUC127) domain	1	0
PF08669	GCV_T_C	Glycine cleavage T-protein C-terminal barrel domain	1	0
PF09786	CytochromB561_N	Cytochrome B561, N terminal	1	0
PF10211	Ax_dynein_light	Axonemal dynein light chain	1	0
PF10239	DUF2465	Protein of unknown function (DUF2465)	1	0
PF10255	Paf67	RNA polymerase I-associated factor PAF67	1	0
PF10256	Erf4	Golgin subfamily A member 7/ERF4 family	1	0
PF10509	GalKase_gal_bdg	Galactokinase galactose-binding signature	1	0
PF10545	MADF_DNA_bdg	Alcohol dehydrogenase transcription factor Myb/SANT-like	1	0
PF12510	Smoothelin	Smoothelin cytoskeleton protein	1	0
PF13297	Telomere_Sde2_2	Telomere stability C-terminal	1	0
PF13685	Fe-ADH_2	Iron-containing alcohol dehydrogenase	1	0
PF14681	UPRTase	Uracil phosphoribosyltransferase	1	0
PF14744	WASH-7_mid	WASH complex subunit 7	1	0
PF00472	RF-1	RF-1 domain	1	0
PF02223	Thymidylate_kin	Thymidylate kinase	1	0
PF02230	Abhydrolase_2	Phospholipase/Carboxylesterase	1	0
PF02841	GBP_C	Guanylate-binding protein, C-terminal domain	1	0
PF02881	SRP54_N	SRP54-type protein, helical bundle domain	1	0
PF03153	TFIIA	Transcription factor IIA, alpha/beta subunit	1	0
PF03650	MPC	Uncharacterised protein family (UPF0041)	1	0
PF05021	NPL4	NPL4 family	1	0
PF08292	RNA_pol_Rbc25	RNA polymerase III subunit Rpc25	1	0
PF10275	Peptidase_C65	Peptidase C65 Otubain	1	0
PF10431	ClpB_D2-small	C-terminal, D2-small domain, of ClpB protein	1	0
PF14260	zf-C4pol	C4-type zinc-finger of DNA polymerase delta	1	0
PF00185	OTCace	Aspartate/ornithine carbamoyltransferase, Asp/Orn binding domain	1	0
PF00186	DHFR_1	Dihydrofolate reductase	1	0
PF00303	Thymidylat_synt	Thymidylate synthase	1	0
PF00317	Ribonuc_red_lgN	Ribonucleotide reductase, all-alpha domain	1	0
PF00453	Ribosomal_L20	Ribosomal protein L20	1	0
PF00491	Arginase	Arginase family	1	0
PF00631	G-gamma	GGL domain	1	0
PF00692	dUTPase	dUTPase	1	0
PF00717	Peptidase_S24	Peptidase S24-like	1	0
PF00750	tRNA-synt_1d	tRNA synthetases class I (R)	1	0
PF00766	ETF_alpha	Electron transfer flavoprotein FAD-binding domain	1	0
PF00927	Transglut_C	Transglutaminase family, C-terminal ig like domain	1	0
PF01035	DNA_binding_1	6-O-methylguanine DNA methyltransferase, DNA binding domain	1	0
PF01117	Aerolysin	Aerolysin toxin	1	0
PF01133	ER	Enhancer of rudimentary	1	0
PF01175	Urocanase	Urocanase	1	0
PF01186	Lysyl_oxidase	Lysyl oxidase	1	0
PF01191	RNA_pol_Rpb5_C	RNA polymerase Rpb5, C-terminal domain	1	0
PF01192	RNA_pol_Rpb6	RNA polymerase Rpb6	1	0
PF01218	Coprogen_oxidas	Coproporphyrinogen III oxidase	1	0
PF01243	Pyridox_oxidase	Pyridoxamine 5'-phosphate oxidase	1	0
PF01244	Peptidase_M19	Membrane dipeptidase (Peptidase family M19)	1	0
PF01245	Ribosomal_L19	Ribosomal protein L19	1	0
PF01265	Cyto_heme_lyase	Cytochrome c/c1 heme lyase	1	0
PF01269	Fibrillarin	Fibrillarin	1	0
PF01281	Ribosomal_L9_N	Ribosomal protein L9, N-terminal domain	1	0
PF01321	Creatinase_N	Creatinase/Prolidase N-terminal domain	1	0
PF01329	Pterin_4a	Pterin 4 alpha carbinolamine dehydratase	1	0
PF01351	RNase_HII	Ribonuclease HII	1	0
PF01443	Viral_helicase1	Viral (Superfamily 1) RNA helicase	1	0
PF01625	PMSR	Peptide methionine sulfoxide reductase	1	0
PF01693	Cauli_VI	Caulimovirus viroplasmin	1	0
PF01783	Ribosomal_L32p	Ribosomal L32p protein family	1	0
PF01786	AOX	Alternative oxidase	1	0
PF01812	5-FTHF_cyc-lig	5-formyltetrahydrofolate cyclo-ligase family	1	0
PF01813	ATP-synt_D	ATP synthase subunit D	1	0
PF01883	DUF59	Domain of unknown function DUF59	1	0
PF01912	eIF-6	eIF-6 family	1	0
PF01922	SRP19	SRP19 protein	1	0
PF01928	CYTH	CYTH domain	1	0
PF01984	dsDNA_bind	Double-stranded DNA-binding domain	1	0
PF02100	ODC_AZ	Ornithine decarboxylase antizyme	1	0
PF02127	Peptidase_M18	Aminopeptidase I zinc metalloprotease (M18)	1	0
PF02229	PC4	Transcriptional Coactivator p15 (PC4)	1	0
PF02251	PA28_alpha	Proteasome activator pa28 alpha subunit	1	0
PF02252	PA28_beta	Proteasome activator pa28 beta subunit	1	0
PF02262	Cbl_N	CBL proto-oncogene N-terminal domain 1	1	0
PF02268	TFIIA_gamma_N	Transcription initiation factor IIA, gamma subunit, helical domain	1	0
PF02311	AraC_binding	AraC-like ligand binding domain	1	0
PF02312	CBF_beta	Core binding factor beta subunit	1	0
PF02330	MAM33	Mitochondrial glycoprotein	1	0
PF02374	ArsA_ATPase	Anion-transporting ATPase	1	0
PF02617	ClpS	ATP-dependent Clp protease adaptor protein ClpS	1	0
PF02628	COX15-CtaA	Cytochrome oxidase assembly protein	1	0
PF02729	OTCace_N	Aspartate/ornithine carbamoyltransferase, carbamoyl-P binding domain	1	0
PF02751	TFIIA_gamma_C	Transcription initiation factor IIA, gamma subunit	1	0
PF02761	Cbl_N2	CBL proto-oncogene N-terminus, EF hand-like domain	1	0
PF02762	Cbl_N3	CBL proto-oncogene N-terminus, SH2-like domain	1	0
PF02864	STAT_bind	STAT protein, DNA binding domain	1	0
PF02897	Peptidase_S9_N	Prolyl oligopeptidase, N-terminal beta-propeller domain	1	0
PF02898	NO_synthase	Nitric oxide synthase, oxygenase domain	1	0
PF03079	ARD	ARD/ARD' family	1	0
PF03224	V-ATPase_H_N	V-ATPase subunit H	1	0
PF03311	Cornichon	Cornichon protein	1	0
PF03359	GKAP	Guanylate-kinase-associated protein (GKAP) protein	1	0
PF03404	Mo-co_dimer	Mo-co oxidoreductase dimerisation domain	1	0
PF03477	ATP-cone	ATP cone domain	1	0
PF03531	SSrecog	Structure-specific recognition protein (SSRP1)	1	0
PF03540	TFIID_30kDa	Transcription initiation factor TFIID 23-30kDa subunit	1	0
PF03571	Peptidase_M49	Peptidase family M49	1	0
PF03657	UPF0113	Uncharacterised protein family (UPF0113)	1	0
PF03669	UPF0139	Uncharacterised protein family (UPF0139)	1	0
PF03847	TFIID_20kDa	Transcription initiation factor TFIID subunit A	1	0
PF03874	RNA_pol_Rpb4	RNA polymerase Rpb4	1	0
PF03951	Gln-synt_N	Glutamine synthetase, beta-Grasp domain	1	0
PF03981	Ubiq_cyt_C_chap	Ubiquinol-cytochrome C chaperone	1	0
PF03986	Autophagy_N	Autophagocytosis associated protein (Atg3), N-terminal domain	1	0
PF04037	DUF382	Domain of unknown function (DUF382)	1	0
PF04056	Ssl1	Ssl1-like	1	0
PF04057	Rep-A_N	Replication factor-A protein 1, N-terminal domain	1	0
PF04152	Mre11_DNA_bind	Mre11 DNA-binding presumed domain	1	0
PF04430	DUF498	Protein of unknown function (DUF498/DUF598)	1	0
PF04588	HIG_1_N	Hypoxia induced protein conserved region	1	0
PF04622	ERG2_Sigma1R	ERG2 and Sigma1 receptor like protein	1	0
PF04729	ASF1_hist_chap	ASF1 like histone chaperone	1	0
PF04930	FUN14	FUN14 family	1	0
PF04992	RNA_pol_Rpb1_6	RNA polymerase Rpb1, domain 6	1	0
PF05005	Ocnus	Janus/Ocnus family (Ocnus)	1	0
PF05351	GMP_PDE_delta	GMP-PDE, delta subunit	1	0
PF05527	DUF758	Domain of unknown function (DUF758)	1	0
PF05735	TSP_C	Thrombospondin C-terminal region	1	0
PF05856	ARPC4	ARP2/3 complex 20 kDa subunit (ARPC4)	1	0
PF05890	Ebp2	Eukaryotic rRNA processing protein EBP2	1	0
PF05994	FragX_IP	Cytoplasmic Fragile-X interacting family	1	0
PF05995	CDO_I	Cysteine dioxygenase type I	1	0
PF06026	Rib_5-P_isom_A	Ribose 5-phosphate isomerase A (phosphoriboisomerase A)	1	0
PF06388	DUF1075	Protein of unknown function (DUF1075)	1	0
PF06396	AGTRAP	Angiotensin II, type I receptor-associated protein (AGTRAP)	1	0
PF06415	iPGM_N	BPG-independent PGAM N-terminus (iPGM_N)	1	0
PF06417	DUF1077	Protein of unknown function (DUF1077)	1	0
PF06487	SAP18	Sin3 associated polypeptide p18 (SAP18)	1	0
PF06645	SPC12	Microsomal signal peptidase 12 kDa subunit (SPC12)	1	0
PF06703	SPC25	Microsomal signal peptidase 25 kDa subunit (SPC25)	1	0
PF06775	Seipin	Putative adipose-regulatory protein (Seipin)	1	0
PF06859	Bin3	Bicoid-interacting protein 3 (Bin3)	1	0
PF06936	Selenoprotein_S	Selenoprotein S (SelS)	1	0
PF06984	MRP-L47	Mitochondrial 39-S ribosomal protein L47 (MRP-L47)	1	0
PF07106	TBPIP	Tat binding protein 1(TBP-1)-interacting protein (TBPIP)	1	0
PF07412	Geminin	Geminin	1	0
PF07426	Dynactin_p22	Dynactin subunit p22	1	0
PF07533	BRK	BRK domain	1	0
PF07541	EIF_2_alpha	Eukaryotic translation initiation factor 2 alpha subunit	1	0
PF07896	DUF1674	Protein of unknown function (DUF1674)	1	0
PF08063	PADR1	PADR1 (NUC008) domain	1	0
PF08146	BP28CT	BP28CT (NUC211) domain	1	0
PF08323	Glyco_transf_5	Starch synthase catalytic domain	1	0
PF08326	ACC_central	Acetyl-CoA carboxylase, central region	1	0
PF08336	P4Ha_N	Prolyl 4-Hydroxylase alpha-subunit, N-terminal region	1	0
PF08448	PAS_4	PAS fold	1	0
PF08506	Cse1	Cse1	1	0
PF08547	CIA30	Complex I intermediate-associated protein 30 (CIA30)	1	0
PF08557	Lipid_DES	Sphingolipid Delta4-desaturase (DES)	1	0
PF08569	Mo25	Mo25-like	1	0
PF08597	eIF3_subunit	Translation initiation factor eIF3 subunit	1	0
PF08615	RNase_H2_suC	Ribonuclease H2 non-catalytic subunit (Ylr154p-like)	1	0
PF08648	DUF1777	Protein of unknown function (DUF1777)	1	0
PF08661	Rep_fac-A_3	Replication factor A protein 3	1	0
PF08825	E2_bind	E2 binding domain	1	0
PF08925	DUF1907	Domain of Unknown Function (DUF1907)	1	0
PF09070	PFU	PFU (PLAA family ubiquitin binding)	1	0
PF09079	Cdc6_C	CDC6, C terminal	1	0
PF09110	HAND	HAND	1	0
PF09111	SLIDE	SLIDE	1	0
PF09180	ProRS-C_1	Prolyl-tRNA synthetase, C-terminal	1	0
PF09402	MSC	Man1-Src1p-C-terminal domain	1	0
PF09532	FDF	FDF domain	1	0
PF09767	DUF2053	Predicted membrane protein (DUF2053)	1	0
PF09788	Tmemb_55A	Transmembrane protein 55A	1	0
PF09793	AD	Anticodon-binding domain	1	0
PF09822	ABC_transp_aux	ABC-type uncharacterized transport system	1	0
PF10147	CR6_interact	Growth arrest and DNA-damage-inducible proteins-interacting protein 1	1	0
PF10166	DUF2368	Uncharacterised conserved protein (DUF2368)	1	0
PF10180	DUF2373	Uncharacterised conserved protein (DUF2373)	1	0
PF10183	ESSS	ESSS subunit of NADH:ubiquinone oxidoreductase (complex I)	1	0
PF10248	Mlf1IP	Myelodysplasia-myeloid leukemia factor 1-interacting protein	1	0
PF10262	Rdx	Rdx family	1	0
PF10276	zf-CHCC	Zinc-finger domain	1	0
PF10415	FumaraseC_C	Fumarase C C-terminus	1	0
PF10498	IFT57	Intra-flagellar transport protein 57	1	0
PF10501	Ribosomal_L50	Ribosomal subunit 39S	1	0
PF10544	T5orf172	T5orf172 domain	1	0
PF10558	MTP18	Mitochondrial 18 KDa protein (MTP18)	1	0
PF10590	PNPOx_C	Pyridoxine 5'-phosphate oxidase C-terminal dimerisation region	1	0
PF10914	DUF2781	Protein of unknown function (DUF2781)	1	0
PF11175	DUF2961	Protein of unknown function (DUF2961)	1	0
PF11261	IRF-2BP1_2	Interferon regulatory factor 2-binding protein zinc finger	1	0
PF11705	RNA_pol_3_Rpc31	DNA-directed RNA polymerase III subunit Rpc31	1	0
PF11708	Slu7	Pre-mRNA splicing Prp18-interacting factor	1	0
PF11718	CPSF73-100_C	Pre-mRNA 3'-end-processing endonuclease polyadenylation factor C-term	1	0
PF11788	MRP-L46	39S mitochondrial ribosomal protein L46	1	0
PF11931	DUF3449	Domain of unknown function (DUF3449)	1	0
PF11957	efThoc1	THO complex subunit 1 transcription elongation factor	1	0
PF12037	DUF3523	Domain of unknown function (DUF3523)	1	0
PF12125	Beta-TrCP_D	D domain of beta-TrCP	1	0
PF12317	IFT46_B_C	Intraflagellar transport complex B protein 46 C terminal	1	0
PF12496	BNIP2	Bcl2-/adenovirus E1B nineteen kDa-interacting protein 2	1	0
PF13439	Glyco_transf_4	Glycosyltransferase Family 4	1	0
PF13455	MUG113	Meiotically up-regulated gene 113	1	0
PF13462	Thioredoxin_4	Thioredoxin	1	0
PF13468	Glyoxalase_3	Glyoxalase-like domain	1	0
PF14138	COX16	Cytochrome c oxidase assembly protein COX16	1	0
PF14578	GTP_EFTU_D4	Elongation factor Tu domain 4	1	0
PF14646	MYCBPAP	MYCBP-associated protein family	1	0
PF14691	Fer4_20	Dihydroprymidine dehydrogenase domain II, 4Fe-4S cluster	1	0
PF14746	WASH-7_C	WASH complex subunit 7, C-terminal	1	0
PF14759	Reductase_C	Reductase C-terminal	1	0
PF14768	RPA_interact_C	Replication protein A interacting C-terminal	1	0
PF14845	Glycohydro_20b2	beta-acetyl hexosaminidase like	1	0
PF14955	MRP-S24	Mitochondrial ribosome subunit S24	1	0
PF15007	CEP44	Centrosomal spindle body, CEP44	1	0
PF15122	TMEM206	TMEM206 protein family	1	0
PF15247	SLBP_RNA_bind	Histone RNA hairpin-binding protein RNA-binding domain	1	0
PF02077	SURF4	SURF4 family	1	0
PF03208	PRA1	PRA1 family protein	1	0
PF03364	Polyketide_cyc	Polyketide cyclase / dehydrase and lipid transport	1	0
PF03647	Tmemb_14	Transmembrane proteins 14C	1	0
PF04379	DUF525	Protein of unknown function (DUF525)	1	0
PF05361	PP1_inhibitor	PKC-activated protein phosphatase-1 inhibitor	1	0
PF08583	Cmc1	Cytochrome c oxidase biogenesis protein Cmc1 like	1	0
PF09759	Atx10homo_assoc	Spinocerebellar ataxia type 10 protein domain	1	0
PF10531	SLBB	SLBB domain	1	0
PF10780	MRP_L53	39S ribosomal protein L53/MRP-L53	1	0
PF11605	Vps36_ESCRT-II	Vacuolar protein sorting protein 36 Vps36	1	0
PF13233	Complex1_LYR_2	Complex1_LYR-like	1	0
PF15043	CNRIP1	CB1 cannabinoid receptor-interacting protein 1	1	0
PF00806	PUF	Pumilio-family RNA binding repeat	0	7
PF00805	Pentapeptide	Pentapeptide repeats (8 copies)	0	6
PF00791	ZU5	ZU5 domain	0	6
PF00219	IGFBP	Insulin-like growth factor binding protein	0	5
PF02137	A_deamin	Adenosine-deaminase (editase) domain	0	4
PF10294	Methyltransf_16	Putative methyltransferase	0	3
PF14853	Fis1_TPR_C	Fis1 C-terminal tetratricopeptide repeat	0	3
PF14608	zf-CCCH_2	Zinc finger C-x8-C-x5-C-x3-H type	0	2
PF03137	OATP	Organic Anion Transporter Polypeptide (OATP) family	0	2
PF07885	Ion_trans_2	Ion channel	0	2
PF01751	Toprim	Toprim domain	0	2
PF13621	Cupin_8	Cupin-like domain	0	1
PF05175	MTS	Methyltransferase small domain	0	1
PF02902	Peptidase_C48	Ulp1 protease family, C-terminal catalytic domain	0	1
PF03045	DAN	DAN domain	0	1
PF01757	Acyl_transf_3	Acyltransferase family	0	1
PF10300	DUF3808	Protein of unknown function (DUF3808)	0	1
PF04495	GRASP55_65	GRASP55/65 PDZ-like domain	0	1
PF00204	DNA_gyraseB	DNA gyrase B	0	1
PF11232	Med25	Mediator complex subunit 25 PTOV activation and synapsin 2	0	1

## Sheet: Margin 28-31C vs 26C, 3weeks
Margin 28-31C vs 26C, 3weeks
PFAM	ID	Desc	UP	DOWN
PF03098	An_peroxidase	Animal haem peroxidase	1	0
PF00651	BTB	BTB/POZ domain	3	0
PF04989	CmcI	Cephalosporin hydroxylase	2	0
PF01410	COLFI	Fibrillar collagen C-terminal domain	2	0
PF00147	Fibrinogen_C	Fibrinogen beta and gamma chains, C-terminal globular domain	2	0
PF00335	Tetraspannin	Tetraspanin family	1	0
PF00028	Cadherin	Cadherin domain	0	7
PF08266	Cadherin_2	Cadherin 2 domain	0	7
PF16184	Cadherin_3	Cadherin 3 domain	0	8
PF07989	Cnn_1N	Centrosomin N-terminal motif 1	0	2
PF09172	DUF1943	Domain of unknown function	0	4
PF00041	fn3	Fibronectin type III domain	0	3
PF00396	Granulin	Granulin	0	6
PF01658	Inos-1-P_synth	Myo-inositol-1-phosphate synthase	0	1
PF07994	NAD_binding_5	Myo-inositol-1-phosphate synthase	0	2
PF08234	Spindle_Spc25	Chromosome segregation protein Spc25	0	2
PF01347	Vitellogenin_N	Lipoprotein amino terminal region	0	1
PF00094	VWD	von Willebrand factor type D domain	0	1

## Sheet: Digitate 31C vs 28C, 24hr
Digitate 31C vs 28C, 24hr
PFAM	ID	Desc	UP	DOWN
PF00036	EF-hand_1	EF hand	79	2
PF13405	EF-hand_6	EF-hand domain	71	2
PF01391	Collagen	Collagen triple helix repeat (20 copies)	67	0
PF13833	EF-hand_8	EF-hand domain pair	62	2
PF13202	EF-hand_5	EF hand	54	2
PF00076	RRM_1	RNA recognition motif. (a.k.a. RRM, RBD, or RNP domain)	51	0
PF13499	EF-hand_7	EF-hand domain pair	41	2
PF00008	EGF	EGF-like domain	33	31
PF00089	Trypsin	Trypsin	33	5
PF00092	VWA	von Willebrand factor type A domain	31	10
PF00435	Spectrin	Spectrin repeat	30	74
PF07648	Kazal_2	Kazal-type serine protease inhibitor domain	30	2
PF00050	Kazal_1	Kazal-type serine protease inhibitor domain	29	1
PF01290	Thymosin	Thymosin beta-4 family	29	0
PF00400	WD40	WD domain, G-beta repeat	28	0
PF13519	VWA_2	von Willebrand factor type A domain	27	7
PF00630	Filamin	Filamin/ABP280 repeat	27	2
PF07645	EGF_CA	Calcium-binding EGF domain	27	2
PF13606	Ank_3	Ankyrin repeat	24	0
PF12661	hEGF	Human growth factor-like EGF	23	14
PF00023	Ank	Ankyrin repeat	23	0
PF00086	Thyroglobulin_1	Thyroglobulin type-1 repeat	22	0
PF05184	SapB_1	Saposin-like type B, region 1	22	0
PF13637	Ank_4	Ankyrin repeats (many copies)	21	0
PF00515	TPR_1	Tetratricopeptide repeat	20	4
PF07974	EGF_2	EGF-like domain	20	0
PF14497	GST_C_3	Glutathione S-transferase, C-terminal domain	20	0
PF13176	TPR_7	Tetratricopeptide repeat	20	0
PF02822	Antistasin	Antistasin family	20	0
PF13857	Ank_5	Ankyrin repeats (many copies)	19	0
PF13181	TPR_8	Tetratricopeptide repeat	19	0
PF00088	Trefoil	Trefoil (P-type) domain	19	0
PF07719	TPR_2	Tetratricopeptide repeat	18	0
PF13513	HEAT_EZ	HEAT-like repeat	18	0
PF00514	Arm	Armadillo/beta-catenin-like repeat	17	0
PF00059	Lectin_C	Lectin C-type domain	17	0
PF02985	HEAT	HEAT repeat	17	0
PF13428	TPR_14	Tetratricopeptide repeat	17	0
PF00069	Pkinase	Protein kinase domain	16	2
PF07714	Pkinase_Tyr	Protein tyrosine kinase	16	1
PF13414	TPR_11	TPR repeat	16	0
PF12796	Ank_2	Ankyrin repeats (3 copies)	16	0
PF14670	FXa_inhibition	Coagulation Factor Xa inhibitory site	16	0
PF00043	GST_C	Glutathione S-transferase, C-terminal domain	16	0
PF00171	Aldedh	Aldehyde dehydrogenase family	16	0
PF03489	SapB_2	Saposin-like type B, region 2	16	0
PF00013	KH_1	KH domain	15	4
PF02798	GST_N	Glutathione S-transferase, N-terminal domain	15	0
PF13646	HEAT_2	HEAT repeats	15	0
PF00057	Ldl_recept_a	Low-density lipoprotein receptor domain class A	14	5
PF13424	TPR_12	Tetratricopeptide repeat	13	3
PF00307	CH	Calponin homology (CH) domain	13	2
PF13893	RRM_5	RNA recognition motif. (a.k.a. RRM, RBD, or RNP domain)	13	0
PF00153	Mito_carr	Mitochondrial carrier protein	13	0
PF03098	An_peroxidase	Animal haem peroxidase	13	0
PF03131	bZIP_Maf	bZIP Maf transcription factor	13	0
PF07650	KH_2	KH domain	13	0
PF00094	VWD	von Willebrand factor type D domain	12	2
PF00246	Peptidase_M14	Zinc carboxypeptidase	12	1
PF12755	Vac14_Fab1_bd	Vacuolar 14 Fab1-binding region	12	0
PF00112	Peptidase_C1	Papain family cysteine protease	12	0
PF13432	TPR_16	Tetratricopeptide repeat	12	0
PF00170	bZIP_1	bZIP transcription factor	12	0
PF13431	TPR_17	Tetratricopeptide repeat	12	0
PF14559	TPR_19	Tetratricopeptide repeat	12	0
PF13516	LRR_6	Leucine Rich repeat	11	0
PF13374	TPR_10	Tetratricopeptide repeat	11	0
PF00626	Gelsolin	Gelsolin repeat	11	0
PF00051	Kringle	Kringle domain	11	0
PF00402	Calponin	Calponin family repeat	11	0
PF13768	VWA_3	von Willebrand factor type A domain	10	9
PF00085	Thioredoxin	Thioredoxin	10	0
PF12799	LRR_4	Leucine Rich repeats (2 copies)	10	0
PF00560	LRR_1	Leucine Rich Repeat	10	0
PF00107	ADH_zinc_N	Zinc-binding dehydrogenase	10	0
PF00118	Cpn60_TCP1	TCP-1/cpn60 chaperonin family	10	0
PF13410	GST_C_2	Glutathione S-transferase, C-terminal domain	10	0
PF00313	CSD	'Cold-shock' DNA-binding domain	10	0
PF02806	Alpha-amylase_C	Alpha amylase, C-terminal all-beta domain	10	0
PF00240	ubiquitin	Ubiquitin family	9	3
PF00722	Glyco_hydro_16	Glycosyl hydrolases family 16	9	0
PF13385	Laminin_G_3	Concanavalin A-like lectin/glucanases superfamily	9	0
PF00565	SNase	Staphylococcal nuclease homologue	9	0
PF00652	Ricin_B_lectin	Ricin-type beta-trefoil lectin domain	9	0
PF13041	PPR_2	PPR repeat family	9	0
PF00538	Linker_histone	linker histone H1 and H5 family	9	0
PF12662	cEGF	Complement Clr-like EGF-like	8	3
PF00071	Ras	Ras family	8	0
PF00025	Arf	ADP-ribosylation factor family	8	0
PF00271	Helicase_C	Helicase conserved C-terminal domain	8	0
PF00412	LIM	LIM domain	8	0
PF13174	TPR_6	Tetratricopeptide repeat	8	0
PF00335	Tetraspannin	Tetraspanin family	8	0
PF00396	Granulin	Granulin	8	0
PF01505	Vault	Major Vault Protein repeat	8	0
PF00038	Filament	Intermediate filament protein	8	0
PF14605	Nup35_RRM_2	Nup53/35/40-type RNA recognition motif	8	0
PF13465	zf-H2C2_2	Zinc-finger double domain	7	0
PF13855	LRR_8	Leucine rich repeat	7	0
PF11976	Rad60-SLD	Ubiquitin-2 like Rad60 SUMO-like	7	0
PF13417	GST_N_3	Glutathione S-transferase, N-terminal domain	7	0
PF01535	PPR	PPR repeat	7	0
PF00191	Annexin	Annexin	7	0
PF08246	Inhibitor_I29	Cathepsin propeptide inhibitor domain (I29)	7	0
PF07716	bZIP_2	Basic region leucine zipper	7	0
PF00578	AhpC-TSA	AhpC/TSA family	7	0
PF00122	E1-E2_ATPase	E1-E2 ATPase	7	0
PF00806	PUF	Pumilio-family RNA binding repeat	7	0
PF02874	ATP-synt_ab_N	ATP synthase alpha/beta family, beta-barrel domain	7	0
PF04712	Radial_spoke	Radial spokehead-like protein	7	0
PF10587	EF-1_beta_acid	Eukaryotic elongation factor 1 beta central acidic region	7	0
PF00024	PAN_1	PAN domain	7	0
PF02807	ATP-gua_PtransN	ATP:guanido phosphotransferase, N-terminal domain	7	0
PF00042	Globin	Globin	7	0
PF00006	ATP-synt_ab	ATP synthase alpha/beta family, nucleotide-binding domain	6	2
PF00595	PDZ	PDZ domain (Also known as DHR or GLGF)	6	2
PF00704	Glyco_hydro_18	Glycosyl hydrolases family 18	6	1
PF13894	zf-C2H2_4	C2H2-type zinc finger	6	0
PF00108	Thiolase_N	Thiolase, N-terminal domain	6	0
PF00179	UQ_con	Ubiquitin-conjugating enzyme	6	0
PF00096	zf-C2H2	Zinc finger, C2H2 type	6	0
PF13848	Thioredoxin_6	Thioredoxin-like domain	6	0
PF02803	Thiolase_C	Thiolase, C-terminal domain	6	0
PF12717	Cnd1	non-SMC mitotic condensation complex subunit 1	6	0
PF00128	Alpha-amylase	Alpha amylase, catalytic domain	6	0
PF00181	Ribosomal_L2	Ribosomal Proteins L2, RNA binding domain	6	0
PF12874	zf-met	Zinc-finger of C2H2 type	6	0
PF14560	Ubiquitin_2	Ubiquitin-like domain	6	0
PF00270	DEAD	DEAD/DEAH box helicase	6	0
PF00106	adh_short	short chain dehydrogenase	6	0
PF13561	adh_short_C2	Enoyl-(Acyl carrier protein) reductase	6	0
PF00155	Aminotran_1_2	Aminotransferase class I and II	6	0
PF00561	Abhydrolase_1	alpha/beta hydrolase fold	6	0
PF03144	GTP_EFTU_D2	Elongation factor Tu domain 2	6	0
PF12171	zf-C2H2_jaz	Zinc-finger double-stranded RNA-binding	6	0
PF05193	Peptidase_M16_C	Peptidase M16 inactive domain	6	0
PF13409	GST_N_2	Glutathione S-transferase, N-terminal domain	6	0
PF00675	Peptidase_M16	Insulinase (Peptidase family M16)	6	0
PF13895	Ig_2	Immunoglobulin domain	5	13
PF00084	Sushi	Sushi domain (SCR repeat)	5	4
PF00035	dsrm	Double-stranded RNA binding motif	5	0
PF00090	TSP_1	Thrombospondin type 1 domain	5	0
PF04670	Gtr1_RagA	Gtr1/RagA G protein conserved region	5	0
PF01399	PCI	PCI domain	5	0
PF12756	zf-C2H2_2	C2H2 type zinc-finger (2 copies)	5	0
PF00261	Tropomyosin	Tropomyosin	5	0
PF00343	Phosphorylase	Carbohydrate phosphorylase	5	0
PF01496	V_ATPase_I	V-type ATPase 116kDa subunit family	5	0
PF12718	Tropomyosin_1	Tropomyosin like	5	0
PF12348	CLASP_N	CLASP N terminal	5	0
PF13905	Thioredoxin_8	Thioredoxin-like	5	0
PF02020	W2	eIF4-gamma/eIF5/eIF2-epsilon	5	0
PF00428	Ribosomal_60s	60s Acidic ribosomal protein	5	0
PF01479	S4	S4 domain	5	0
PF00217	ATP-gua_Ptrans	ATP:guanido phosphotransferase, C-terminal catalytic domain	5	0
PF01849	NAC	NAC domain	5	0
PF03036	Perilipin	Perilipin family	5	0
PF00168	C2	C2 domain	5	0
PF00373	FERM_M	FERM central domain	5	0
PF06119	NIDO	Nidogen-like	5	0
PF00160	Pro_isomerase	Cyclophilin type peptidyl-prolyl cis-trans isomerase/CLD	5	0
PF00014	Kunitz_BPTI	Kunitz/Bovine pancreatic trypsin inhibitor domain	5	0
PF01145	Band_7	SPFH domain / Band 7 family	5	0
PF14295	PAN_4	PAN domain	5	0
PF13812	PPR_3	Pentatricopeptide repeat domain	5	0
PF00811	Ependymin	Ependymin	5	0
PF07679	I-set	Immunoglobulin I-set domain	4	14
PF00754	F5_F8_type_C	F5/8 type C domain	4	6
PF12947	EGF_3	EGF domain	4	3
PF00022	Actin	Actin	4	0
PF08240	ADH_N	Alcohol dehydrogenase GroES-like domain	4	0
PF00890	FAD_binding_2	FAD binding domain	4	0
PF00505	HMG_box	HMG (high mobility group) box	4	0
PF01576	Myosin_tail_1	Myosin tail	4	0
PF02469	Fasciclin	Fasciclin domain	4	0
PF00956	NAP	Nucleosome assembly protein (NAP)	4	0
PF03051	Peptidase_C1_2	Peptidase C1-like family	4	0
PF09011	HMG_box_2	HMG-box domain	4	0
PF00503	G-alpha	G-protein alpha subunit	4	0
PF04756	OST3_OST6	OST3 / OST6 family	4	0
PF05605	zf-Di19	Drought induced 19 protein (Di19), zinc-binding	4	0
PF00135	COesterase	Carboxylesterase family	4	0
PF00274	Glycolytic	Fructose-bisphosphate aldolase class-I	4	0
PF04774	HABP4_PAI-RBP1	Hyaluronan / mRNA binding family	4	0
PF07004	SHIPPO-rpt	Sperm-tail PG-rich repeat	4	0
PF08564	CDC37_C	Cdc37 C terminal domain	4	0
PF08565	CDC37_M	Cdc37 Hsp90 binding domain	4	0
PF00903	Glyoxalase	Glyoxalase/Bleomycin resistance protein/Dioxygenase superfamily	4	0
PF02136	NTF2	Nuclear transport factor 2 (NTF2) domain	4	0
PF02466	Tim17	Tim17/Tim22/Tim23/Pmp24 family	4	0
PF00689	Cation_ATPase_C	Cation transporting ATPase, C-terminus	4	0
PF13899	Thioredoxin_7	Thioredoxin-like	4	0
PF00037	Fer4	4Fe-4S binding domain	4	0
PF02866	Ldh_1_C	lactate/malate dehydrogenase, alpha/beta C-terminal domain	4	0
PF08282	Hydrolase_3	haloacid dehalogenase-like hydrolase	4	0
PF09379	FERM_N	FERM N-terminal domain	4	0
PF00009	GTP_EFTU	Elongation factor Tu GTP binding domain	4	0
PF13371	TPR_9	Tetratricopeptide repeat	4	0
PF00702	Hydrolase	haloacid dehalogenase-like hydrolase	4	0
PF00012	HSP70	Hsp70 protein	4	0
PF01398	JAB	JAB1/Mov34/MPN/PAD-1 ubiquitin protease	4	0
PF13098	Thioredoxin_2	Thioredoxin-like domain	4	0
PF00328	His_Phos_2	Histidine phosphatase superfamily (branch 2)	4	0
PF02574	S-methyl_trans	Homocysteine S-methyltransferase	4	0
PF10591	SPARC_Ca_bdg	Secreted protein acidic and rich in cysteine Ca binding region	4	0
PF13602	ADH_zinc_N_2	Zinc-binding dehydrogenase	4	0
PF13927	Ig_3	Immunoglobulin domain	3	14
PF13365	Trypsin_2	Trypsin-like peptidase domain	3	4
PF07534	TLD	TLD	3	1
PF01826	TIL	Trypsin Inhibitor like cysteine rich domain	3	0
PF07885	Ion_trans_2	Ion channel	3	0
PF15410	PH_9	Pleckstrin homology domain	3	0
PF03193	DUF258	Protein of unknown function, DUF258	3	0
PF13881	Rad60-SLD_2	Ubiquitin-2 like Rad60 SUMO-like	3	0
PF13180	PDZ_2	PDZ domain	3	0
PF03143	GTP_EFTU_D3	Elongation factor Tu C-terminal domain	3	0
PF00183	HSP90	Hsp90 protein	3	0
PF08534	Redoxin	Redoxin	3	0
PF14709	DND1_DSRM	double strand RNA binding domain from DEAD END PROTEIN 1	3	0
PF05221	AdoHcyase	S-adenosyl-L-homocysteine hydrolase	3	0
PF00137	ATP-synt_C	ATP synthase subunit C	3	0
PF00235	Profilin	Profilin	3	0
PF00690	Cation_ATPase_N	Cation transporter/ATPase, N-terminus	3	0
PF01323	DSBA	DSBA-like thioredoxin domain	3	0
PF13242	Hydrolase_like	HAD-hyrolase-like	3	0
PF00194	Carb_anhydrase	Eukaryotic-type carbonic anhydrase	3	0
PF00248	Aldo_ket_red	Aldo/keto reductase family	3	0
PF00063	Myosin_head	Myosin head (motor domain)	3	0
PF00520	Ion_trans	Ion transport protein	3	0
PF04851	ResIII	Type III restriction enzyme, res subunit	3	0
PF00501	AMP-binding	AMP-binding enzyme	3	0
PF01266	DAO	FAD dependent oxidoreductase	3	0
PF00091	Tubulin	Tubulin/FtsZ family, GTPase domain	3	0
PF00642	zf-CCCH	Zinc finger C-x8-C-x5-C-x3-H type (and similar)	3	0
PF02221	E1_DerP2_DerF2	ML domain	3	0
PF12763	EF-hand_4	Cytoskeletal-regulatory complex EF hand	3	0
PF02771	Acyl-CoA_dh_N	Acyl-CoA dehydrogenase, N-terminal domain	3	0
PF02784	Orn_Arg_deC_N	Pyridoxal-dependent decarboxylase, pyridoxal binding domain	3	0
PF00467	KOW	KOW motif	3	0
PF02826	2-Hacid_dh_C	D-isomer specific 2-hydroxyacid dehydrogenase, NAD binding domain	3	0
PF04749	PLAC8	PLAC8 family	3	0
PF00241	Cofilin_ADF	Cofilin/tropomyosin-type actin-binding protein	3	0
PF00258	Flavodoxin_1	Flavodoxin	3	0
PF01248	Ribosomal_L7Ae	Ribosomal protein L7Ae/L30e/S12e/Gadd45 family	3	0
PF00450	Peptidase_S10	Serine carboxypeptidase	3	0
PF00736	EF1_GNE	EF-1 guanine nucleotide exchange domain	3	0
PF06462	Hyd_WA	Propeller	3	0
PF00011	HSP20	Hsp20/alpha crystallin family	3	0
PF00056	Ldh_1_N	lactate/malate dehydrogenase, NAD binding domain	3	0
PF06747	CHCH	CHCH domain	3	0
PF09066	B2-adapt-app_C	Beta2-adaptin appendage, C-terminal sub-domain	3	0
PF00109	ketoacyl-synt	Beta-ketoacyl synthase, N-terminal domain	3	0
PF00262	Calreticulin	Calreticulin family	3	0
PF00910	RNA_helicase	RNA helicase	3	0
PF01201	Ribosomal_S8e	Ribosomal protein S8e	3	0
PF02629	CoA_binding	CoA binding domain	3	0
PF06963	FPN1	Ferroportin1 (FPN1)	3	0
PF10417	1-cysPrx_C	C-terminal domain of 1-Cys peroxiredoxin	3	0
PF12831	FAD_oxidored	FAD dependent oxidoreductase	3	0
PF13469	Sulfotransfer_3	Sulfotransferase family	3	0
PF00344	SecY	SecY translocase	3	0
PF00393	6PGD	6-phosphogluconate dehydrogenase, C-terminal domain	3	0
PF01124	MAPEG	MAPEG family	3	0
PF01382	Avidin	Avidin family	3	0
PF02936	COX4	Cytochrome c oxidase subunit IV	3	0
PF03630	Fumble	Fumble	3	0
PF05470	eIF-3c_N	Eukaryotic translation initiation factor 3 subunit 8 N-terminus	3	0
PF10302	DUF2407	DUF2407 ubiquitin-like domain	3	0
PF10559	Plug_translocon	Plug domain of Sec61p	3	0
PF13292	DXP_synthase_N	1-deoxy-D-xylulose-5-phosphate synthase	3	0
PF14306	PUA_2	PUA-like domain	3	0
PF07686	V-set	Immunoglobulin V-set domain	2	15
PF00047	ig	Immunoglobulin domain	2	14
PF00769	ERM	Ezrin/radixin/moesin family	2	9
PF08205	C2-set_2	CD80-like C2-set immunoglobulin domain	2	8
PF00041	fn3	Fibronectin type III domain	2	5
PF00226	DnaJ	DnaJ domain	2	3
PF11971	CAMSAP_CH	CAMSAP CH domain	2	2
PF03148	Tektin	Tektin family	2	1
PF00188	CAP	Cysteine-rich secretory protein family	2	1
PF01926	MMR_HSR1	50S ribosome-binding GTPase	2	1
PF00210	Ferritin	Ferritin-like domain	2	1
PF00067	p450	Cytochrome P450	2	0
PF07728	AAA_5	AAA domain (dynein-related subfamily)	2	0
PF00149	Metallophos	Calcineurin-like phosphoesterase	2	0
PF14531	Kinase-like	Kinase-like	2	0
PF12697	Abhydrolase_6	Alpha/beta hydrolase family	2	0
PF00004	AAA	ATPase family associated with various cellular activities (AAA)	2	0
PF08241	Methyltransf_11	Methyltransferase domain	2	0
PF00567	TUDOR	Tudor domain	2	0
PF00884	Sulfatase	Sulfatase	2	0
PF01370	Epimerase	NAD dependent epimerase/dehydratase family	2	0
PF13649	Methyltransf_25	Methyltransferase domain	2	0
PF13489	Methyltransf_23	Methyltransferase domain	2	0
PF06293	Kdo	Lipopolysaccharide kinase (Kdo/WaaP) family	2	0
PF13450	NAD_binding_8	NAD(P)-binding Rossmann-like domain	2	0
PF07992	Pyr_redox_2	Pyridine nucleotide-disulphide oxidoreductase	2	0
PF05496	RuvB_N	Holliday junction DNA helicase ruvB N-terminus	2	0
PF04969	CS	CS domain	2	0
PF00637	Clathrin	Region in Clathrin and VPS	2	0
PF09380	FERM_C	FERM C-terminal PH-like domain	2	0
PF12710	HAD	haloacid dehalogenase-like hydrolase	2	0
PF00254	FKBP_C	FKBP-type peptidyl-prolyl cis-trans isomerase	2	0
PF00481	PP2C	Protein phosphatase 2C	2	0
PF05721	PhyH	Phytanoyl-CoA dioxygenase (PhyH)	2	0
PF00300	His_Phos_1	Histidine phosphatase superfamily (branch 1)	2	0
PF01423	LSM	LSM domain	2	0
PF13401	AAA_22	AAA domain	2	0
PF00650	CRAL_TRIO	CRAL/TRIO domain	2	0
PF01217	Clat_adaptor_s	Clathrin adaptor complex small chain	2	0
PF00244	14-3-3	14-3-3 protein	2	0
PF01061	ABC2_membrane	ABC-2 type transporter	2	0
PF02518	HATPase_c	Histidine kinase-, DNA gyrase B-, and HSP90-like ATPase	2	0
PF13589	HATPase_c_3	Histidine kinase-, DNA gyrase B-, and HSP90-like ATPase	2	0
PF00355	Rieske	Rieske [2Fe-2S] domain	2	0
PF00667	FAD_binding_1	FAD binding domain	2	0
PF00962	A_deaminase	Adenosine/AMP deaminase	2	0
PF02668	TauD	Taurine catabolism dioxygenase TauD, TfdA family	2	0
PF03764	EFG_IV	Elongation factor G, domain IV	2	0
PF00318	Ribosomal_S2	Ribosomal protein S2	2	0
PF00549	Ligase_CoA	CoA-ligase	2	0
PF01216	Calsequestrin	Calsequestrin	2	0
PF01712	dNK	Deoxynucleoside kinase	2	0
PF02991	Atg8	Autophagy protein Atg8 ubiquitin like	2	0
PF04110	APG12	Ubiquitin-like autophagy protein Apg12	2	0
PF00150	Cellulase	Cellulase (glycosyl hydrolase family 5)	2	0
PF00438	S-AdoMet_synt_N	S-adenosylmethionine synthetase, N-terminal domain	2	0
PF01347	Vitellogenin_N	Lipoprotein amino terminal region	2	0
PF01704	UDPGP	UTP--glucose-1-phosphate uridylyltransferase	2	0
PF03781	FGE-sulfatase	Sulfatase-modifying factor enzyme 1	2	0
PF00347	Ribosomal_L6	Ribosomal protein L6	2	0
PF00466	Ribosomal_L10	Ribosomal protein L10	2	0
PF01731	Arylesterase	Arylesterase	2	0
PF02036	SCP2	SCP-2 sterol transfer family	2	0
PF02449	Glyco_hydro_42	Beta-galactosidase	2	0
PF06628	Catalase-rel	Catalase-related immune-responsive	2	0
PF07810	TMC	TMC domain	2	0
PF08726	EFhand_Ca_insen	Ca2+ insensitive EF hand	2	0
PF00276	Ribosomal_L23	Ribosomal protein L23	2	0
PF01027	Bax1-I	Inhibitor of apoptosis-promoting Bax1	2	0
PF05602	CLPTM1	Cleft lip and palate transmembrane protein 1 (CLPTM1)	2	0
PF06723	MreB_Mbl	MreB/Mbl protein	2	0
PF07915	PRKCSH	Glucosidase II beta subunit-like protein	2	0
PF08016	PKD_channel	Polycystin cation channel	2	0
PF00319	SRF-TF	SRF-type transcription factor (DNA-binding and dimerisation domain)	2	0
PF00572	Ribosomal_L13	Ribosomal protein L13	2	0
PF00694	Aconitase_C	Aconitase C-terminal domain	2	0
PF00838	TCTP	Translationally controlled tumour protein	2	0
PF01012	ETF	Electron transfer flavoprotein domain	2	0
PF01084	Ribosomal_S18	Ribosomal protein S18	2	0
PF01253	SUI1	Translation initiation factor SUI1	2	0
PF02046	COX6A	Cytochrome c oxidase subunit VIa	2	0
PF02209	VHP	Villin headpiece domain	2	0
PF02516	STT3	Oligosaccharyl transferase STT3 subunit	2	0
PF02736	Myosin_N	Myosin N-terminal SH3-like domain	2	0
PF02773	S-AdoMet_synt_C	S-adenosylmethionine synthetase, C-terminal domain	2	0
PF03946	Ribosomal_L11_N	Ribosomal protein L11, N-terminal domain	2	0
PF12838	Fer4_7	4Fe-4S dicluster domain	2	0
PF13237	Fer4_10	4Fe-4S dicluster domain	2	0
PF13669	Glyoxalase_4	Glyoxalase/Bleomycin resistance protein/Dioxygenase superfamily	2	0
PF00162	PGK	Phosphoglycerate kinase	2	0
PF00281	Ribosomal_L5	Ribosomal protein L5	2	0
PF01015	Ribosomal_S3Ae	Ribosomal S3Ae family	2	0
PF01159	Ribosomal_L6e	Ribosomal protein L6e	2	0
PF01280	Ribosomal_L19e	Ribosomal protein L19e	2	0
PF03939	Ribosomal_L23eN	Ribosomal protein L23, N-terminal domain	2	0
PF05197	TRIC	TRIC channel	2	0
PF10142	PhoPQ_related	PhoPQ-activated pathogenicity-related protein	2	0
PF13330	Mucin2_WxxW	Mucin-2 protein WxxW repeating region	2	0
PF00031	Cystatin	Cystatin domain	2	0
PF00189	Ribosomal_S3_C	Ribosomal protein S3, C-terminal domain	2	0
PF00231	ATP-synt	ATP synthase	2	0
PF00316	FBPase	Fructose-1-6-bisphosphatase	2	0
PF00327	Ribosomal_L30	Ribosomal protein L30p/L7e	2	0
PF00647	EF1G	Elongation factor 1 gamma, conserved domain	2	0
PF00705	PCNA_N	Proliferating cell nuclear antigen, N-terminal domain	2	0
PF00719	Pyrophosphatase	Inorganic pyrophosphatase	2	0
PF00831	Ribosomal_L29	Ribosomal L29 protein	2	0
PF00900	Ribosomal_S4e	Ribosomal family S4e	2	0
PF00932	LTD	Lamin Tail Domain	2	0
PF01058	Oxidored_q6	NADH ubiquinone oxidoreductase, 20 Kd subunit	2	0
PF01086	Clathrin_lg_ch	Clathrin light chain	2	0
PF01146	Caveolin	Caveolin	2	0
PF01282	Ribosomal_S24e	Ribosomal protein S24e	2	0
PF01381	HTH_3	Helix-turn-helix	2	0
PF01583	APS_kinase	Adenylylsulphate kinase	2	0
PF01676	Metalloenzyme	Metalloenzyme superfamily	2	0
PF01747	ATP-sulfurylase	ATP-sulfurylase	2	0
PF01777	Ribosomal_L27e	Ribosomal L27e protein family	2	0
PF01929	Ribosomal_L14e	Ribosomal protein L14	2	0
PF02199	SapA	Saposin A-type domain	2	0
PF02747	PCNA_C	Proliferating cell nuclear antigen, C-terminal domain	2	0
PF03045	DAN	DAN domain	2	0
PF03947	Ribosomal_L2_C	Ribosomal Proteins L2, C-terminal domain	2	0
PF04568	IATP	Mitochondrial ATPase inhibitor, IATP	2	0
PF05907	DUF866	Eukaryotic protein of unknown function (DUF866)	2	0
PF06071	YchF-GTPase_C	Protein of unknown function (DUF933)	2	0
PF06098	Radial_spoke_3	Radial spoke protein 3	2	0
PF07228	SpoIIE	Stage II sporulation protein E (SpoIIE)	2	0
PF07978	NIPSNAP	NIPSNAP	2	0
PF08079	Ribosomal_L30_N	Ribosomal L30 N-terminal domain	2	0
PF09440	eIF3_N	eIF3 subunit 6 N terminal domain	2	0
PF09728	Taxilin	Myosin-like coiled-coil protein	2	0
PF10515	APP_amyloid	beta-amyloid precursor protein C-terminus	2	0
PF12901	SUZ-C	SUZ-C motif	2	0
PF13183	Fer4_8	4Fe-4S dicluster domain	2	0
PF13187	Fer4_9	4Fe-4S dicluster domain	2	0
PF13442	Cytochrome_CBB3	Cytochrome C oxidase, cbb3-type, subunit III	2	0
PF13534	Fer4_17	4Fe-4S dicluster domain	2	0
PF13560	HTH_31	Helix-turn-helix domain	2	0
PF14204	Ribosomal_L18_c	Ribosomal L18 C-terminal region	2	0
PF14374	Ribos_L4_asso_C	60S ribosomal protein L4 C-terminal domain	2	0
PF14617	CMS1	U3-containing 90S pre-ribosomal complex subunit	2	0
PF15238	FAM181	FAM181	2	0
PF15353	HECA	Headcase protein family homologue	2	0
PF00504	Chloroa_b-bind	Chlorophyll A-B binding protein	2	0
PF04707	PRELI	PRELI-like family	2	0
PF07654	C1-set	Immunoglobulin C1-set domain	2	0
PF09360	zf-CDGSH	Iron-binding zinc finger CDGSH type	2	0
PF05960	DUF885	Bacterial protein of unknown function (DUF885)	1	2
PF09342	DUF1986	Domain of unknown function (DUF1986)	1	2
PF00530	SRCR	Scavenger receptor cysteine-rich domain	1	0
PF00098	zf-CCHC	Zinc knuckle	1	0
PF08659	KR	KR domain	1	0
PF00536	SAM_1	SAM domain (Sterile alpha motif)	1	0
PF00054	Laminin_G_1	Laminin G domain	1	0
PF01593	Amino_oxidase	Flavin containing amine oxidoreductase	1	0
PF00169	PH	PH domain	1	0
PF00102	Y_phosphatase	Protein-tyrosine phosphatase	1	0
PF02421	FeoB_N	Ferrous iron transport protein B	1	0
PF14580	LRR_9	Leucine-rich repeat	1	0
PF00441	Acyl-CoA_dh_1	Acyl-CoA dehydrogenase, C-terminal domain	1	0
PF02770	Acyl-CoA_dh_M	Acyl-CoA dehydrogenase, middle domain	1	0
PF00070	Pyr_redox	Pyridine nucleotide-disulphide oxidoreductase	1	0
PF00989	PAS	PAS fold	1	0
PF00080	Sod_Cu	Copper/zinc superoxide dismutase (SODC)	1	0
PF01483	P_proprotein	Proprotein convertase P-domain	1	0
PF00178	Ets	Ets-domain	1	0
PF03372	Exo_endo_phos	Endonuclease/Exonuclease/phosphatase family	1	0
PF07647	SAM_2	SAM domain (Sterile alpha motif)	1	0
PF07653	SH3_2	Variant SH3 domain	1	0
PF13639	zf-RING_2	Ring finger domain	1	0
PF13847	Methyltransf_31	Methyltransferase domain	1	0
PF02210	Laminin_G_2	Laminin G domain	1	0
PF09439	SRPRB	Signal recognition particle receptor beta subunit	1	0
PF00082	Peptidase_S8	Subtilase family	1	0
PF13621	Cupin_8	Cupin-like domain	1	0
PF13460	NAD_binding_10	NADH(P)-binding	1	0
PF00266	Aminotran_5	Aminotransferase class-V	1	0
PF00173	Cyt-b5	Cytochrome b5-like Heme/Steroid binding domain	1	0
PF00134	Cyclin_N	Cyclin, N-terminal domain	1	0
PF00571	CBS	CBS domain	1	0
PF08450	SGL	SMP-30/Gluconolaconase/LRE-like region	1	0
PF00755	Carn_acyltransf	Choline/Carnitine o-acyltransferase	1	0
PF01602	Adaptin_N	Adaptin N terminal region	1	0
PF06325	PrmA	Ribosomal protein L11 methyltransferase (PrmA)	1	0
PF04389	Peptidase_M28	Peptidase family M28	1	0
PF05368	NmrA	NmrA-like family	1	0
PF12678	zf-rbx1	RING-H2 zinc finger	1	0
PF00334	NDK	Nucleoside diphosphate kinase	1	0
PF01546	Peptidase_M20	Peptidase family M20/M25/M40	1	0
PF08028	Acyl-CoA_dh_2	Acyl-CoA dehydrogenase, C-terminal domain	1	0
PF02902	Peptidase_C48	Ulp1 protease family, C-terminal catalytic domain	1	0
PF00175	NAD_binding_1	Oxidoreductase NAD-binding domain	1	0
PF00557	Peptidase_M24	Metallopeptidase family M24	1	0
PF00679	EFG_C	Elongation factor G C-terminus	1	0
PF00294	PfkB	pfkB family carbohydrate kinase	1	0
PF08416	PTB	Phosphotyrosine-binding domain	1	0
PF13191	AAA_16	AAA ATPase domain	1	0
PF00264	Tyrosinase	Common central domain of tyrosinase	1	0
PF01428	zf-AN1	AN1-like Zinc finger	1	0
PF02037	SAP	SAP domain	1	0
PF00278	Orn_DAP_Arg_deC	Pyridoxal-dependent decarboxylase, C-terminal sheet domain	1	0
PF02170	PAZ	PAZ domain	1	0
PF02779	Transket_pyr	Transketolase, pyrimidine binding domain	1	0
PF06565	DUF1126	Repeat of unknown function (DUF1126)	1	0
PF00676	E1_dh	Dehydrogenase E1 component	1	0
PF08030	NAD_binding_6	Ferric reductase NAD binding domain	1	0
PF00180	Iso_dh	Isocitrate/isopropylmalate dehydrogenase	1	0
PF01134	GIDA	Glucose inhibited division protein A	1	0
PF01920	Prefoldin_2	Prefoldin subunit	1	0
PF02737	3HCDH_N	3-hydroxyacyl-CoA dehydrogenase, NAD binding domain	1	0
PF02752	Arrestin_C	Arrestin (or S-antigen), C-terminal domain	1	0
PF03446	NAD_binding_2	NAD binding domain of 6-phosphogluconate dehydrogenase	1	0
PF01435	Peptidase_M48	Peptidase family M48	1	0
PF02171	Piwi	Piwi domain	1	0
PF02198	SAM_PNT	Sterile alpha motif (SAM)/Pointed domain	1	0
PF05347	Complex1_LYR	Complex 1 protein (LYR family)	1	0
PF08447	PAS_3	PAS fold	1	0
PF14492	EFG_II	Elongation Factor G, domain II	1	0
PF14598	PAS_11	PAS domain	1	0
PF00199	Catalase	Catalase	1	0
PF00306	ATP-synt_ab_C	ATP synthase alpha/beta chain, C terminal domain	1	0
PF00670	AdoHcyase_NAD	S-adenosyl-L-homocysteine hydrolase, NAD binding domain	1	0
PF00725	3HCDH	3-hydroxyacyl-CoA dehydrogenase, C-terminal domain	1	0
PF01053	Cys_Met_Meta_PP	Cys/Met metabolism PLP-dependent enzyme	1	0
PF02014	Reeler	Reeler domain	1	0
PF02883	Alpha_adaptinC2	Adaptin C-terminal domain	1	0
PF03464	eRF1_2	eRF1 domain 2	1	0
PF08022	FAD_binding_8	FAD-binding domain	1	0
PF13012	MitMem_reg	Maintenance of mitochondrial structure and function	1	0
PF13015	PRKCSH_1	Glucosidase II beta subunit-like protein	1	0
PF05018	DUF667	Protein of unknown function (DUF667)	1	0
PF13911	AhpC-TSA_2	AhpC/TSA antioxidant enzyme	1	0
PF00684	DnaJ_CXXCXGXG	DnaJ central domain	1	0
PF00687	Ribosomal_L1	Ribosomal protein L1p/L10e family	1	0
PF00756	Esterase	Putative esterase	1	0
PF00887	ACBP	Acyl CoA binding protein	1	0
PF00996	GDI	GDP dissociation inhibitor	1	0
PF02115	Rho_GDI	RHO protein GDP dissociation inhibitor	1	0
PF02121	IP_trans	Phosphatidylinositol transfer protein	1	0
PF02772	S-AdoMet_synt_M	S-adenosylmethionine synthetase, central domain	1	0
PF02775	TPP_enzyme_C	Thiamine pyrophosphate enzyme, C-terminal TPP binding domain	1	0
PF02780	Transketolase_C	Transketolase, C-terminal domain	1	0
PF03463	eRF1_1	eRF1 domain 1	1	0
PF03465	eRF1_3	eRF1 domain 3	1	0
PF03476	MOSC_N	MOSC N-terminal beta barrel domain	1	0
PF04145	Ctr	Ctr copper transporter family	1	0
PF05186	Dpy-30	Dpy-30 motif	1	0
PF07177	Neuralized	Neuralized	1	0
PF13378	MR_MLE_C	Enolase C-terminal domain-like	1	0
PF00380	Ribosomal_S9	Ribosomal protein S9/S16	1	0
PF03188	Cytochrom_B561	Eukaryotic cytochrome b561	1	0
PF04261	Dyp_perox	Dyp-type peroxidase family	1	0
PF14388	DUF4419	Domain of unknown function (DUF4419)	1	0
PF00026	Asp	Eukaryotic aspartyl protease	1	0
PF00081	Sod_Fe_N	Iron/manganese superoxide dismutases, alpha-hairpin domain	1	0
PF00113	Enolase_C	Enolase, C-terminal TIM barrel domain	1	0
PF00164	Ribosom_S12_S23	Ribosomal protein S12/S23	1	0
PF00177	Ribosomal_S7	Ribosomal protein S7p/S5e	1	0
PF00237	Ribosomal_L22	Ribosomal protein L22p/L17e	1	0
PF00252	Ribosomal_L16	Ribosomal protein L16p/L10e	1	0
PF00287	Na_K-ATPase	Sodium / potassium ATPase beta chain	1	0
PF00297	Ribosomal_L3	Ribosomal protein L3	1	0
PF00298	Ribosomal_L11	Ribosomal protein L11, RNA binding domain	1	0
PF00312	Ribosomal_S15	Ribosomal protein S15	1	0
PF00333	Ribosomal_S5	Ribosomal protein S5, N-terminal domain	1	0
PF00411	Ribosomal_S11	Ribosomal protein S11	1	0
PF00456	Transketolase_N	Transketolase, thiamine diphosphate binding domain	1	0
PF00573	Ribosomal_L4	Ribosomal protein L4/L1 family	1	0
PF00821	PEPCK	Phosphoenolpyruvate carboxykinase	1	0
PF00876	Innexin	Innexin	1	0
PF00883	Peptidase_M17	Cytosol aminopeptidase family, catalytic domain	1	0
PF01049	Cadherin_C	Cadherin cytoplasmic region	1	0
PF01176	eIF-1a	Translation initiation factor 1A / IF-1	1	0
PF01246	Ribosomal_L24e	Ribosomal protein L24e	1	0
PF01261	AP_endonuc_2	Xylose isomerase-like TIM barrel	1	0
PF01459	Porin_3	Eukaryotic porin	1	0
PF01588	tRNA_bind	Putative tRNA binding domain	1	0
PF01603	B56	Protein phosphatase 2A regulatory B subunit (B56 family)	1	0
PF01778	Ribosomal_L28e	Ribosomal L28e protein family	1	0
PF02144	Rad1	Repair protein Rad1/Rec1/Rad17	1	0
PF02777	Sod_Fe_C	Iron/manganese superoxide dismutases, C-terminal domain	1	0
PF03015	Sterile	Male sterility protein	1	0
PF03234	CDC37_N	Cdc37 N terminal kinase binding	1	0
PF03719	Ribosomal_S5_C	Ribosomal protein S5, C-terminal domain	1	0
PF03931	Skp1_POZ	Skp1 family, tetramerisation domain	1	0
PF04139	Rad9	Rad9	1	0
PF04146	YTH	YT521-B-like domain	1	0
PF04989	CmcI	Cephalosporin hydroxylase	1	0
PF05071	NDUFA12	NADH ubiquinone oxidoreductase subunit NDUFA12	1	0
PF06068	TIP49	TIP49 C-terminus	1	0
PF07081	DUF1349	Protein of unknown function (DUF1349)	1	0
PF08736	FA	FERM adjacent (FA)	1	0
PF11978	MVP_shoulder	Shoulder domain	1	0
PF12867	DinB_2	DinB superfamily	1	0
PF14534	DUF4440	Domain of unknown function (DUF4440)	1	0
PF00238	Ribosomal_L14	Ribosomal protein L14p/L23e	1	0
PF00255	GSHPx	Glutathione peroxidase	1	0
PF00673	Ribosomal_L5_C	ribosomal L5P family C-terminus	1	0
PF01287	eIF-5a	Eukaryotic elongation factor 5A hypusine, DNA-binding OB fold	1	0
PF03297	Ribosomal_S25	S25 ribosomal protein	1	0
PF07991	IlvN	Acetohydroxy acid isomeroreductase, catalytic domain	1	0
PF00034	Cytochrom_C	Cytochrome c	1	0
PF00044	Gp_dh_N	Glyceraldehyde 3-phosphate dehydrogenase, NAD binding domain	1	0
PF00121	TIM	Triosephosphate isomerase	1	0
PF00166	Cpn10	Chaperonin 10 Kd subunit	1	0
PF00203	Ribosomal_S19	Ribosomal protein S19	1	0
PF00213	OSCP	ATP synthase delta (OSCP) subunit	1	0
PF00224	PK	Pyruvate kinase, barrel domain	1	0
PF00329	Complex1_30kDa	Respiratory-chain NADH dehydrogenase, 30 Kd subunit	1	0
PF00366	Ribosomal_S17	Ribosomal protein S17	1	0
PF00384	Molybdopterin	Molybdopterin oxidoreductase	1	0
PF00410	Ribosomal_S8	Ribosomal protein S8	1	0
PF00416	Ribosomal_S13	Ribosomal protein S13/S18	1	0
PF00586	AIRS	AIR synthase related protein, N-terminal domain	1	0
PF00827	Ribosomal_L15e	Ribosomal L15	1	0
PF00833	Ribosomal_S17e	Ribosomal S17	1	0
PF00915	Calici_coat	Calicivirus coat protein	1	0
PF00935	Ribosomal_L44	Ribosomal protein L44	1	0
PF01016	Ribosomal_L27	Ribosomal L27 protein	1	0
PF01090	Ribosomal_S19e	Ribosomal protein S19e	1	0
PF01092	Ribosomal_S6e	Ribosomal protein S6e	1	0
PF01127	Sdh_cyt	Succinate dehydrogenase/Fumarate reductase transmembrane subunit	1	0
PF01157	Ribosomal_L21e	Ribosomal protein L21e	1	0
PF01158	Ribosomal_L36e	Ribosomal protein L36e	1	0
PF01198	Ribosomal_L31e	Ribosomal protein L31e	1	0
PF01199	Ribosomal_L34e	Ribosomal protein L34e	1	0
PF01215	COX5B	Cytochrome c oxidase subunit Vb	1	0
PF01247	Ribosomal_L35Ae	Ribosomal protein L35Ae	1	0
PF01251	Ribosomal_S7e	Ribosomal protein S7e	1	0
PF01257	2Fe-2S_thioredx	Thioredoxin-like [2Fe-2S] ferredoxin	1	0
PF01283	Ribosomal_S26e	Ribosomal protein S26e	1	0
PF01294	Ribosomal_L13e	Ribosomal protein L13e	1	0
PF01599	Ribosomal_S27	Ribosomal protein S27a	1	0
PF01655	Ribosomal_L32e	Ribosomal protein L32	1	0
PF01776	Ribosomal_L22e	Ribosomal L22e protein family	1	0
PF01780	Ribosomal_L37ae	Ribosomal L37ae protein family	1	0
PF01784	NIF3	NIF3 (NGG1p interacting factor 3)	1	0
PF02064	MAS20	MAS20 protein import receptor	1	0
PF02109	DAD	DAD family	1	0
PF02167	Cytochrom_C1	Cytochrome C1 family	1	0
PF02271	UCR_14kD	Ubiquinol-cytochrome C reductase complex 14kD subunit	1	0
PF02284	COX5A	Cytochrome c oxidase subunit Va	1	0
PF02453	Reticulon	Reticulon	1	0
PF02769	AIRS_C	AIR synthase related protein, C-terminal domain	1	0
PF02800	Gp_dh_C	Glyceraldehyde 3-phosphate dehydrogenase, C-terminal domain	1	0
PF02823	ATP-synt_DE_N	ATP synthase, Delta/Epsilon chain, beta-sandwich domain	1	0
PF02910	Succ_DH_flav_C	Fumarate reductase flavoprotein C-term	1	0
PF02921	UCR_TM	Ubiquinol cytochrome reductase transmembrane region	1	0
PF03271	EB1	EB1-like C-terminal motif	1	0
PF03345	DDOST_48kD	Oligosaccharyltransferase 48 kDa subunit beta	1	0
PF03501	S10_plectin	Plectin/S10 domain	1	0
PF03896	TRAP_alpha	Translocon-associated protein (TRAP), alpha subunit	1	0
PF03952	Enolase_N	Enolase, N-terminal domain	1	0
PF03957	Jun	Jun-like transcription factor	1	0
PF04062	P21-Arc	ARP2/3 complex ARPC3 (21 kDa) subunit	1	0
PF04636	PA26	PA26 p53-induced protein (sestrin)	1	0
PF04683	Proteasom_Rpn13	Proteasome complex subunit Rpn13 ubiquitin receptor	1	0
PF04699	P16-Arc	ARP2/3 complex 16 kDa subunit (p16-Arc)	1	0
PF04716	ETC_C1_NDUFA5	ETC complex I subunit conserved region	1	0
PF04718	ATP-synt_G	Mitochondrial ATP synthase g subunit	1	0
PF04758	Ribosomal_S30	Ribosomal protein S30	1	0
PF04800	ETC_C1_NDUFA4	ETC complex I subunit conserved region	1	0
PF04908	SH3BGR	SH3-binding, glutamic acid-rich protein	1	0
PF05091	eIF-3_zeta	Eukaryotic translation initiation factor 3 subunit 7 (eIF-3)	1	0
PF05328	CybS	CybS	1	0
PF05348	UMP1	Proteasome maturation factor UMP1	1	0
PF05404	TRAP-delta	Translocon-associated protein, delta subunit precursor (TRAP-delta)	1	0
PF05405	Mt_ATP-synt_B	Mitochondrial ATP synthase B chain precursor (ATP-synt_B)	1	0
PF05456	eIF_4EBP	Eukaryotic translation initiation factor 4E binding protein (EIF4EBP)	1	0
PF05511	ATP-synt_F6	Mitochondrial ATP synthase coupling factor 6	1	0
PF05694	SBP56	56kDa selenium binding protein (SBP56)	1	0
PF05719	GPP34	Golgi phosphoprotein 3 (GPP34)	1	0
PF05753	TRAP_beta	Translocon-associated protein beta (TRAPB)	1	0
PF05821	NDUF_B8	NADH-ubiquinone oxidoreductase ASHI subunit (CI-ASHI or NDUFB8)	1	0
PF05873	Mt_ATP-synt_D	ATP synthase D chain, mitochondrial (ATP5H)	1	0
PF06110	DUF953	Eukaryotic protein of unknown function (DUF953)	1	0
PF06140	Ifi-6-16	Interferon-induced 6-16 family	1	0
PF07074	TRAP-gamma	Translocon-associated protein, gamma subunit (TRAP-gamma)	1	0
PF07742	BTG	BTG family	1	0
PF07946	DUF1682	Protein of unknown function (DUF1682)	1	0
PF08003	Methyltransf_9	Protein of unknown function (DUF1698)	1	0
PF08069	Ribosomal_S13_N	Ribosomal S13/S15 N-terminal domain	1	0
PF08071	RS4NT	RS4NT (NUC023) domain	1	0
PF08075	NOPS	NOPS (NUC059) domain	1	0
PF08152	GUCT	GUCT (NUC152) domain	1	0
PF08327	AHSA1	Activator of Hsp90 ATPase homolog 1-like protein	1	0
PF08523	MBF1	Multiprotein bridging factor 1	1	0
PF08560	DUF1757	Protein of unknown function (DUF1757)	1	0
PF09173	eIF2_C	Initiation factor eIF2 gamma, C terminal	1	0
PF09377	SBDS_C	SBDS protein C-terminal domain	1	0
PF10249	NDUFB10	NADH-ubiquinone oxidoreductase subunit 10	1	0
PF10274	ParcG	Parkin co-regulated protein	1	0
PF11027	DUF2615	Protein of unknown function (DUF2615)	1	0
PF12353	eIF3g	Eukaryotic translation initiation factor 3 subunit G	1	0
PF12424	ATP_Ca_trans_C	Plasma membrane calcium transporter ATPase C terminal	1	0
PF13085	Fer2_3	2Fe-2S iron-sulfur cluster binding domain	1	0
PF13607	Succ_CoA_lig	Succinyl-CoA ligase like flavodoxin domain	1	0
PF14413	Thg1C	Thg1 C terminal domain	1	0
PF15228	DAP	Death-associated protein	1	0
PF04281	Tom22	Mitochondrial import receptor subunit Tom22	1	0
PF05517	p25-alpha	p25-alpha	1	0
PF06212	GRIM-19	GRIM-19 protein	1	0
PF07830	PP2C_C	Protein serine/threonine phosphatase 2C, C-terminal domain	1	0
PF10206	WRW	Mitochondrial F1F0-ATP synthase, subunit f	1	0
PF10660	MitoNEET_N	Iron-containing outer mitochondrial membrane protein N-terminus	1	0
PF13695	zf-3CxxC	Zinc-binding domain	1	0
PF14942	Muted	Organelle biogenesis, Muted-like protein	1	0
PF13851	GAS	Growth-arrest specific micro-tubule binding	0	15
PF00651	BTB	BTB/POZ domain	0	6
PF00621	RhoGEF	RhoGEF domain	0	5
PF01048	PNP_UDP_1	Phosphorylase superfamily	0	3
PF00028	Cadherin	Cadherin domain	0	3
PF01431	Peptidase_M13	Peptidase family M13	0	3
PF05649	Peptidase_M13_N	Peptidase family M13	0	3
PF07690	MFS_1	Major Facilitator Superfamily	0	2
PF12937	F-box-like	F-box-like	0	2
PF13358	DDE_3	DDE superfamily endonuclease	0	2
PF01163	RIO1	RIO1 family	0	2
PF01066	CDP-OH_P_transf	CDP-alcohol phosphatidyltransferase	0	2
PF09756	DDRGK	DDRGK domain	0	2
PF00646	F-box	F-box domain	0	1
PF00078	RVT_1	Reverse transcriptase (RNA-dependent DNA polymerase)	0	1
PF03221	HTH_Tnp_Tc5	Tc5 transposase DNA-binding domain	0	1
PF14291	DUF4371	Domain of unknown function (DUF4371)	0	1
PF04548	AIG1	AIG1 family	0	1
PF00046	Homeobox	Homeobox domain	0	1
PF00644	PARP	Poly(ADP-ribose) polymerase catalytic domain	0	1
PF03184	DDE_1	DDE superfamily endonuclease	0	1
PF00735	Septin	Septin	0	1
PF01400	Astacin	Astacin (Peptidase family M12A)	0	1
PF00753	Lactamase_B	Metallo-beta-lactamase superfamily	0	1
PF00854	PTR2	POT family	0	1
PF01284	MARVEL	Membrane-associating domain	0	1
PF04784	DUF547	Protein of unknown function, DUF547	0	1
PF00105	zf-C4	Zinc finger, C4 type (two domains)	0	1
PF00588	SpoU_methylase	SpoU rRNA Methylase family	0	1
PF01026	TatD_DNase	TatD related DNase	0	1
PF00115	COX1	Cytochrome C and Quinol oxidase polypeptide I	0	1
PF06479	Ribonuc_2-5A	Ribonuclease 2-5A	0	1
PF09412	XendoU	Endoribonuclease XendoU	0	1

## Sheet: Digitate 31C vs 28C, 3weeks
Digitate 31C vs 28C, 3weeks
PFAM	ID	Desc	UP	DOWN
PF13637	Ank_4	Ankyrin repeats (many copies)	16	260
PF13516	LRR_6	Leucine Rich repeat	15	53
PF13606	Ank_3	Ankyrin repeat	14	311
PF00023	Ank	Ankyrin repeat	13	304
PF00560	LRR_1	Leucine Rich Repeat	10	23
PF13857	Ank_5	Ankyrin repeats (many copies)	9	269
PF00084	Sushi	Sushi domain (SCR repeat)	9	94
PF13540	RCC1_2	Regulator of chromosome condensation (RCC1) repeat	9	8
PF12796	Ank_2	Ankyrin repeats (3 copies)	8	176
PF00069	Pkinase	Protein kinase domain	8	157
PF02985	HEAT	HEAT repeat	8	97
PF00008	EGF	EGF-like domain	7	301
PF07714	Pkinase_Tyr	Protein tyrosine kinase	7	143
PF12799	LRR_4	Leucine Rich repeats (2 copies)	7	89
PF13513	HEAT_EZ	HEAT-like repeat	7	69
PF03130	HEAT_PBS	PBS lyase HEAT-like repeat	7	4
PF13927	Ig_3	Immunoglobulin domain	5	299
PF07645	EGF_CA	Calcium-binding EGF domain	5	186
PF13519	VWA_2	von Willebrand factor type A domain	5	93
PF01290	Thymosin	Thymosin beta-4 family	5	0
PF00515	TPR_1	Tetratricopeptide repeat	4	193
PF13424	TPR_12	Tetratricopeptide repeat	4	123
PF13855	LRR_8	Leucine rich repeat	4	81
PF00531	Death	Death domain	4	48
PF07648	Kazal_2	Kazal-type serine protease inhibitor domain	4	43
PF00004	AAA	ATPase family associated with various cellular activities (AAA)	4	38
PF00313	CSD	'Cold-shock' DNA-binding domain	4	14
PF00088	Trefoil	Trefoil (P-type) domain	4	8
PF00644	PARP	Poly(ADP-ribose) polymerase catalytic domain	4	7
PF00806	PUF	Pumilio-family RNA binding repeat	4	0
PF01391	Collagen	Collagen triple helix repeat (20 copies)	3	306
PF00400	WD40	WD domain, G-beta repeat	3	274
PF13895	Ig_2	Immunoglobulin domain	3	264
PF00076	RRM_1	RNA recognition motif. (a.k.a. RRM, RBD, or RNP domain)	3	169
PF12947	EGF_3	EGF domain	3	126
PF13374	TPR_10	Tetratricopeptide repeat	3	125
PF00092	VWA	von Willebrand factor type A domain	3	108
PF13174	TPR_6	Tetratricopeptide repeat	3	98
PF13646	HEAT_2	HEAT repeats	3	91
PF00089	Trypsin	Trypsin	3	71
PF00050	Kazal_1	Kazal-type serine protease inhibitor domain	3	41
PF00252	Ribosomal_L16	Ribosomal protein L16p/L10e	3	9
PF00569	ZZ	Zinc finger, ZZ type	3	5
PF07534	TLD	TLD	3	2
PF07969	Amidohydro_3	Amidohydrolase family	3	2
PF06462	Hyd_WA	Propeller	3	0
PF00530	SRCR	Scavenger receptor cysteine-rich domain	2	485
PF07679	I-set	Immunoglobulin I-set domain	2	246
PF07719	TPR_2	Tetratricopeptide repeat	2	197
PF00041	fn3	Fibronectin type III domain	2	166
PF13181	TPR_8	Tetratricopeptide repeat	2	164
PF12662	cEGF	Complement Clr-like EGF-like	2	137
PF00626	Gelsolin	Gelsolin repeat	2	85
PF00085	Thioredoxin	Thioredoxin	2	72
PF13768	VWA_3	von Willebrand factor type A domain	2	38
PF12717	Cnd1	non-SMC mitotic condensation complex subunit 1	2	38
PF00240	ubiquitin	Ubiquitin family	2	34
PF13401	AAA_22	AAA domain	2	27
PF01399	PCI	PCI domain	2	25
PF02866	Ldh_1_C	lactate/malate dehydrogenase, alpha/beta C-terminal domain	2	19
PF00428	Ribosomal_60s	60s Acidic ribosomal protein	2	18
PF00318	Ribosomal_S2	Ribosomal protein S2	2	17
PF12146	Hydrolase_4	Putative lysophospholipase	2	16
PF00056	Ldh_1_N	lactate/malate dehydrogenase, NAD binding domain	2	10
PF00466	Ribosomal_L10	Ribosomal protein L10	2	9
PF14204	Ribosomal_L18_c	Ribosomal L18 C-terminal region	2	9
PF08450	SGL	SMP-30/Gluconolaconase/LRE-like region	2	8
PF00364	Biotin_lipoyl	Biotin-requiring enzyme	2	7
PF13920	zf-C3HC4_3	Zinc finger, C3HC4 type (RING finger)	2	6
PF00640	PID	Phosphotyrosine interaction domain (PTB/PID)	2	6
PF01494	FAD_binding_3	FAD binding domain	2	5
PF00326	Peptidase_S9	Prolyl oligopeptidase family	2	5
PF01431	Peptidase_M13	Peptidase family M13	2	4
PF05649	Peptidase_M13_N	Peptidase family M13	2	3
PF08375	Rpn3_C	Proteasome regulatory subunit C-terminal	2	3
PF01731	Arylesterase	Arylesterase	2	2
PF01597	GCV_H	Glycine cleavage H-protein	2	2
PF05960	DUF885	Bacterial protein of unknown function (DUF885)	2	0
PF07228	SpoIIE	Stage II sporulation protein E (SpoIIE)	2	0
PF06479	Ribonuc_2-5A	Ribonuclease 2-5A	2	0
PF10421	OAS1_C	2'-5'-oligoadenylate synthetase 1, domain 2, C-terminus	2	0
PF04815	Sec23_helical	Sec23/Sec24 helical domain	2	0
PF01326	PPDK_N	Pyruvate phosphate dikinase, PEP/pyruvate binding domain	2	0
PF15494	SRCR_2	Scavenger receptor cysteine-rich domain	1	287
PF00013	KH_1	KH domain	1	87
PF00168	C2	C2 domain	1	48
PF00171	Aldedh	Aldehyde dehydrogenase family	1	45
PF01926	MMR_HSR1	50S ribosome-binding GTPase	1	40
PF00059	Lectin_C	Lectin C-type domain	1	34
PF03098	An_peroxidase	Animal haem peroxidase	1	28
PF00005	ABC_tran	ABC transporter	1	24
PF00335	Tetraspannin	Tetraspanin family	1	24
PF00043	GST_C	Glutathione S-transferase, C-terminal domain	1	23
PF01248	Ribosomal_L7Ae	Ribosomal protein L7Ae/L30e/S12e/Gadd45 family	1	22
PF00270	DEAD	DEAD/DEAH box helicase	1	20
PF00006	ATP-synt_ab	ATP synthase alpha/beta family, nucleotide-binding domain	1	18
PF02221	E1_DerP2_DerF2	ML domain	1	15
PF00481	PP2C	Protein phosphatase 2C	1	14
PF13450	NAD_binding_8	NAD(P)-binding Rossmann-like domain	1	13
PF00928	Adap_comp_sub	Adaptor complexes medium subunit family	1	13
PF07728	AAA_5	AAA domain (dynein-related subfamily)	1	12
PF00160	Pro_isomerase	Cyclophilin type peptidyl-prolyl cis-trans isomerase/CLD	1	12
PF13410	GST_C_2	Glutathione S-transferase, C-terminal domain	1	12
PF00297	Ribosomal_L3	Ribosomal protein L3	1	12
PF00443	UCH	Ubiquitin carboxyl-terminal hydrolase	1	10
PF00134	Cyclin_N	Cyclin, N-terminal domain	1	10
PF00664	ABC_membrane	ABC transporter transmembrane region	1	9
PF13385	Laminin_G_3	Concanavalin A-like lectin/glucanases superfamily	1	9
PF07707	BACK	BTB And C-terminal Kelch	1	9
PF02984	Cyclin_C	Cyclin, C-terminal domain	1	9
PF00687	Ribosomal_L1	Ribosomal protein L1p/L10e family	1	9
PF02518	HATPase_c	Histidine kinase-, DNA gyrase B-, and HSP90-like ATPase	1	8
PF13589	HATPase_c_3	Histidine kinase-, DNA gyrase B-, and HSP90-like ATPase	1	8
PF14534	DUF4440	Domain of unknown function (DUF4440)	1	8
PF00266	Aminotran_5	Aminotransferase class-V	1	7
PF02771	Acyl-CoA_dh_N	Acyl-CoA dehydrogenase, N-terminal domain	1	7
PF00319	SRF-TF	SRF-type transcription factor (DNA-binding and dimerisation domain)	1	7
PF01015	Ribosomal_S3Ae	Ribosomal S3Ae family	1	7
PF00026	Asp	Eukaryotic aspartyl protease	1	7
PF02140	Gal_Lectin	Galactose binding lectin domain	1	7
PF14543	TAXi_N	Xylanase inhibitor N-terminal	1	7
PF02770	Acyl-CoA_dh_M	Acyl-CoA dehydrogenase, middle domain	1	6
PF06293	Kdo	Lipopolysaccharide kinase (Kdo/WaaP) family	1	5
PF01979	Amidohydro_1	Amidohydrolase family	1	5
PF00565	SNase	Staphylococcal nuclease homologue	1	5
PF03501	S10_plectin	Plectin/S10 domain	1	5
PF01263	Aldose_epim	Aldose 1-epimerase	1	5
PF07690	MFS_1	Major Facilitator Superfamily	1	4
PF00704	Glyco_hydro_18	Glycosyl hydrolases family 18	1	4
PF01124	MAPEG	MAPEG family	1	4
PF00203	Ribosomal_S19	Ribosomal protein S19	1	4
PF00366	Ribosomal_S17	Ribosomal protein S17	1	4
PF00520	Ion_trans	Ion transport protein	1	3
PF00648	Peptidase_C2	Calpain family cysteine protease	1	3
PF01778	Ribosomal_L28e	Ribosomal L28e protein family	1	3
PF13578	Methyltransf_24	Methyltransferase domain	1	3
PF08059	SEP	SEP domain	1	3
PF12680	SnoaL_2	SnoaL-like domain	1	3
PF01753	zf-MYND	MYND finger	1	2
PF00962	A_deaminase	Adenosine/AMP deaminase	1	2
PF00575	S1	S1 RNA binding domain	1	2
PF12353	eIF3g	Eukaryotic translation initiation factor 3 subunit G	1	2
PF03366	YEATS	YEATS family	1	2
PF00639	Rotamase	PPIC-type PPIASE domain	1	2
PF13616	Rotamase_3	PPIC-type PPIASE domain	1	2
PF03358	FMN_red	NADPH-dependent FMN reductase	1	2
PF14719	PID_2	Phosphotyrosine interaction domain (PTB/PID)	1	2
PF00753	Lactamase_B	Metallo-beta-lactamase superfamily	1	1
PF07722	Peptidase_C26	Peptidase C26	1	1
PF13426	PAS_9	PAS domain	1	1
PF06814	Lung_7-TM_R	Lung seven transmembrane receptor	1	1
PF02230	Abhydrolase_2	Phospholipase/Carboxylesterase	1	1
PF07541	EIF_2_alpha	Eukaryotic translation initiation factor 2 alpha subunit	1	1
PF00083	Sugar_tr	Sugar (and other) transporter	1	0
PF03133	TTL	Tubulin-tyrosine ligase family	1	0
PF00789	UBX	UBX domain	1	0
PF01780	Ribosomal_L37ae	Ribosomal L37ae protein family	1	0
PF02816	Alpha_kinase	Alpha-kinase family	1	0
PF04811	Sec23_trunk	Sec23/Sec24 trunk domain	1	0
PF08033	Sec23_BS	Sec23/Sec24 beta-sandwich domain	1	0
PF04810	zf-Sec23_Sec24	Sec23/Sec24 zinc finger	1	0
PF12906	RINGv	RING-variant domain	1	0
PF02212	GED	Dynamin GTPase effector domain	1	0
PF04502	DUF572	Family of unknown function (DUF572)	1	0
PF01725	Ham1p_like	Ham1 family	1	0
PF03381	CDC50	LEM3 (ligand-effect modulator 3) family / CDC50 family	1	0
PF05346	DUF747	Eukaryotic membrane protein family	1	0
PF08373	RAP	RAP domain	1	0
PF15247	SLBP_RNA_bind	Histone RNA hairpin-binding protein RNA-binding domain	1	0
PF00036	EF-hand_1	EF hand	0	286
PF13405	EF-hand_6	EF-hand domain	0	285
PF00047	ig	Immunoglobulin domain	0	217
PF13833	EF-hand_8	EF-hand domain pair	0	211
PF03160	Calx-beta	Calx-beta domain	0	210
PF00396	Granulin	Granulin	0	192
PF13499	EF-hand_7	EF-hand domain pair	0	188
PF13202	EF-hand_5	EF hand	0	185
PF12661	hEGF	Human growth factor-like EGF	0	174
PF07974	EGF_2	EGF-like domain	0	159
PF13428	TPR_14	Tetratricopeptide repeat	0	151
PF13176	TPR_7	Tetratricopeptide repeat	0	146
PF13414	TPR_11	TPR repeat	0	133
PF14670	FXa_inhibition	Coagulation Factor Xa inhibitory site	0	117
PF00630	Filamin	Filamin/ABP280 repeat	0	113
PF07686	V-set	Immunoglobulin V-set domain	0	100
PF13432	TPR_16	Tetratricopeptide repeat	0	93
PF13431	TPR_17	Tetratricopeptide repeat	0	91
PF00025	Arf	ADP-ribosylation factor family	0	84
PF00514	Arm	Armadillo/beta-catenin-like repeat	0	83
PF00071	Ras	Ras family	0	79
PF00102	Y_phosphatase	Protein-tyrosine phosphatase	0	79
PF00307	CH	Calponin homology (CH) domain	0	78
PF00112	Peptidase_C1	Papain family cysteine protease	0	74
PF14559	TPR_19	Tetratricopeptide repeat	0	72
PF03489	SapB_2	Saposin-like type B, region 2	0	67
PF13465	zf-H2C2_2	Zinc-finger double domain	0	66
PF13905	Thioredoxin_8	Thioredoxin-like	0	66
PF01826	TIL	Trypsin Inhibitor like cysteine rich domain	0	59
PF00431	CUB	CUB domain	0	59
PF00028	Cadherin	Cadherin domain	0	57
PF00018	SH3_1	SH3 domain	0	57
PF01608	I_LWEQ	I/LWEQ domain	0	57
PF00595	PDZ	PDZ domain (Also known as DHR or GLGF)	0	55
PF13098	Thioredoxin_2	Thioredoxin-like domain	0	54
PF13371	TPR_9	Tetratricopeptide repeat	0	52
PF00096	zf-C2H2	Zinc finger, C2H2 type	0	51
PF00057	Ldl_recept_a	Low-density lipoprotein receptor domain class A	0	51
PF00017	SH2	SH2 domain	0	48
PF00090	TSP_1	Thrombospondin type 1 domain	0	47
PF13894	zf-C2H2_4	C2H2-type zinc finger	0	46
PF00578	AhpC-TSA	AhpC/TSA family	0	46
PF05184	SapB_1	Saposin-like type B, region 1	0	46
PF14604	SH3_9	Variant SH3 domain	0	44
PF07653	SH3_2	Variant SH3 domain	0	42
PF00153	Mito_carr	Mitochondrial carrier protein	0	42
PF05375	Pacifastin_I	Pacifastin inhibitor (LCMII)	0	42
PF00095	WAP	WAP-type (Whey Acidic Protein) 'four-disulfide core'	0	42
PF08205	C2-set_2	CD80-like C2-set immunoglobulin domain	0	41
PF00169	PH	PH domain	0	40
PF00106	adh_short	short chain dehydrogenase	0	40
PF13561	adh_short_C2	Enoyl-(Acyl carrier protein) reductase	0	39
PF08246	Inhibitor_I29	Cathepsin propeptide inhibitor domain (I29)	0	39
PF13899	Thioredoxin_7	Thioredoxin-like	0	39
PF10602	RPN7	26S proteasome subunit RPN7	0	39
PF01535	PPR	PPR repeat	0	38
PF12718	Tropomyosin_1	Tropomyosin like	0	38
PF00503	G-alpha	G-protein alpha subunit	0	37
PF00754	F5_F8_type_C	F5/8 type C domain	0	37
PF01344	Kelch_1	Kelch motif	0	36
PF07716	bZIP_2	Basic region leucine zipper	0	36
PF07650	KH_2	KH domain	0	36
PF03351	DOMON	DOMON domain	0	35
PF00063	Myosin_head	Myosin head (motor domain)	0	35
PF01505	Vault	Major Vault Protein repeat	0	35
PF00009	GTP_EFTU	Elongation factor Tu GTP binding domain	0	34
PF00012	HSP70	Hsp70 protein	0	34
PF13848	Thioredoxin_6	Thioredoxin-like domain	0	34
PF13964	Kelch_6	Kelch motif	0	32
PF00637	Clathrin	Region in Clathrin and VPS	0	32
PF00170	bZIP_1	bZIP transcription factor	0	32
PF00271	Helicase_C	Helicase conserved C-terminal domain	0	31
PF00412	LIM	LIM domain	0	31
PF00501	AMP-binding	AMP-binding enzyme	0	31
PF00014	Kunitz_BPTI	Kunitz/Bovine pancreatic trypsin inhibitor domain	0	31
PF03193	DUF258	Protein of unknown function, DUF258	0	31
PF00373	FERM_M	FERM central domain	0	30
PF00118	Cpn60_TCP1	TCP-1/cpn60 chaperonin family	0	30
PF01602	Adaptin_N	Adaptin N terminal region	0	30
PF00227	Proteasome	Proteasome subunit	0	30
PF04212	MIT	MIT (microtubule interacting and transport) domain	0	30
PF07647	SAM_2	SAM domain (Sterile alpha motif)	0	29
PF00536	SAM_1	SAM domain (Sterile alpha motif)	0	28
PF00191	Annexin	Annexin	0	28
PF13180	PDZ_2	PDZ domain	0	28
PF07654	C1-set	Immunoglobulin C1-set domain	0	28
PF00248	Aldo_ket_red	Aldo/keto reductase family	0	27
PF13191	AAA_16	AAA ATPase domain	0	27
PF13893	RRM_5	RNA recognition motif. (a.k.a. RRM, RBD, or RNP domain)	0	26
PF03144	GTP_EFTU_D2	Elongation factor Tu domain 2	0	26
PF00262	Calreticulin	Calreticulin family	0	26
PF02014	Reeler	Reeler domain	0	26
PF14295	PAN_4	PAN domain	0	25
PF10591	SPARC_Ca_bdg	Secreted protein acidic and rich in cysteine Ca binding region	0	25
PF02218	HS1_rep	Repeat in HS1/Cortactin	0	25
PF00149	Metallophos	Calcineurin-like phosphoesterase	0	24
PF00241	Cofilin_ADF	Cofilin/tropomyosin-type actin-binding protein	0	24
PF01410	COLFI	Fibrillar collagen C-terminal domain	0	24
PF01479	S4	S4 domain	0	24
PF00183	HSP90	Hsp90 protein	0	24
PF08913	VBS	Vinculin Binding Site	0	24
PF09141	Talin_middle	Talin, middle domain	0	24
PF00787	PX	PX domain	0	23
PF00082	Peptidase_S8	Subtilase family	0	23
PF00155	Aminotran_1_2	Aminotransferase class I and II	0	23
PF07992	Pyr_redox_2	Pyridine nucleotide-disulphide oxidoreductase	0	23
PF06119	NIDO	Nidogen-like	0	23
PF09379	FERM_N	FERM N-terminal domain	0	23
PF02803	Thiolase_C	Thiolase, C-terminal domain	0	23
PF04756	OST3_OST6	OST3 / OST6 family	0	23
PF01414	DSL	Delta serrate ligand	0	23
PF13418	Kelch_4	Galactose oxidase, central domain	0	22
PF00098	zf-CCHC	Zinc knuckle	0	22
PF13415	Kelch_3	Galactose oxidase, central domain	0	22
PF14531	Kinase-like	Kinase-like	0	22
PF03143	GTP_EFTU_D3	Elongation factor Tu C-terminal domain	0	22
PF14497	GST_C_3	Glutathione S-transferase, C-terminal domain	0	22
PF12755	Vac14_Fab1_bd	Vacuolar 14 Fab1-binding region	0	22
PF08659	KR	KR domain	0	21
PF12171	zf-C2H2_jaz	Zinc-finger double-stranded RNA-binding	0	21
PF00080	Sod_Cu	Copper/zinc superoxide dismutase (SODC)	0	21
PF06268	Fascin	Fascin domain	0	21
PF00811	Ependymin	Ependymin	0	21
PF00086	Thyroglobulin_1	Thyroglobulin type-1 repeat	0	21
PF00261	Tropomyosin	Tropomyosin	0	21
PF02798	GST_N	Glutathione S-transferase, N-terminal domain	0	20
PF00505	HMG_box	HMG (high mobility group) box	0	20
PF01400	Astacin	Astacin (Peptidase family M12A)	0	20
PF05001	RNA_pol_Rpb1_R	RNA polymerase Rpb1 C-terminal repeat	0	20
PF00450	Peptidase_S10	Serine carboxypeptidase	0	20
PF00244	14-3-3	14-3-3 protein	0	20
PF01851	PC_rep	Proteasome/cyclosome repeat	0	20
PF13517	VCBS	Repeat domain in Vibrio, Colwellia, Bradyrhizobium and Shewanella	0	20
PF10516	SHNi-TPR	SHNi-TPR	0	20
PF00782	DSPc	Dual specificity phosphatase, catalytic domain	0	19
PF00010	HLH	Helix-loop-helix DNA-binding domain	0	19
PF00022	Actin	Actin	0	19
PF09011	HMG_box_2	HMG-box domain	0	19
PF00246	Peptidase_M14	Zinc carboxypeptidase	0	19
PF02874	ATP-synt_ab_N	ATP synthase alpha/beta family, beta-barrel domain	0	19
PF02469	Fasciclin	Fasciclin domain	0	19
PF08534	Redoxin	Redoxin	0	19
PF00210	Ferritin	Ferritin-like domain	0	19
PF04670	Gtr1_RagA	Gtr1/RagA G protein conserved region	0	18
PF14392	zf-CCHC_4	Zinc knuckle	0	18
PF07004	SHIPPO-rpt	Sperm-tail PG-rich repeat	0	18
PF11976	Rad60-SLD	Ubiquitin-2 like Rad60 SUMO-like	0	18
PF13417	GST_N_3	Glutathione S-transferase, N-terminal domain	0	18
PF00091	Tubulin	Tubulin/FtsZ family, GTPase domain	0	18
PF00094	VWD	von Willebrand factor type D domain	0	18
PF08662	eIF2A	Eukaryotic translation initiation factor eIF2A	0	18
PF00058	Ldl_recept_b	Low-density lipoprotein receptor repeat class B	0	18
PF07721	TPR_4	Tetratricopeptide repeat	0	18
PF00108	Thiolase_N	Thiolase, N-terminal domain	0	18
PF12874	zf-met	Zinc-finger of C2H2 type	0	17
PF00107	ADH_zinc_N	Zinc-binding dehydrogenase	0	17
PF00890	FAD_binding_2	FAD binding domain	0	17
PF13917	zf-CCHC_3	Zinc knuckle	0	17
PF05193	Peptidase_M16_C	Peptidase M16 inactive domain	0	17
PF02793	HRM	Hormone receptor domain	0	17
PF01839	FG-GAP	FG-GAP repeat	0	17
PF00024	PAN_1	PAN domain	0	17
PF09325	Vps5	Vps5 C terminal like	0	17
PF00435	Spectrin	Spectrin repeat	0	16
PF02493	MORN	MORN repeat	0	16
PF00067	p450	Cytochrome P450	0	16
PF01370	Epimerase	NAD dependent epimerase/dehydratase family	0	16
PF00027	cNMP_binding	Cyclic nucleotide-binding domain	0	16
PF07646	Kelch_2	Kelch motif	0	16
PF11971	CAMSAP_CH	CAMSAP CH domain	0	16
PF12763	EF-hand_4	Cytoskeletal-regulatory complex EF hand	0	16
PF00467	KOW	KOW motif	0	16
PF01159	Ribosomal_L6e	Ribosomal protein L6e	0	16
PF00504	Chloroa_b-bind	Chlorophyll A-B binding protein	0	16
PF01246	Ribosomal_L24e	Ribosomal protein L24e	0	16
PF02176	zf-TRAF	TRAF-type zinc finger	0	15
PF08241	Methyltransf_11	Methyltransferase domain	0	15
PF01392	Fz	Fz domain	0	15
PF00254	FKBP_C	FKBP-type peptidyl-prolyl cis-trans isomerase	0	15
PF00070	Pyr_redox	Pyridine nucleotide-disulphide oxidoreductase	0	15
PF01145	Band_7	SPFH domain / Band 7 family	0	15
PF03357	Snf7	Snf7	0	15
PF00051	Kringle	Kringle domain	0	15
PF01576	Myosin_tail_1	Myosin tail	0	15
PF01347	Vitellogenin_N	Lipoprotein amino terminal region	0	15
PF06723	MreB_Mbl	MreB/Mbl protein	0	15
PF05922	Inhibitor_I9	Peptidase inhibitor I9	0	15
PF11715	Nup160	Nucleoporin Nup120/160	0	15
PF01094	ANF_receptor	Receptor family ligand binding region	0	14
PF00561	Abhydrolase_1	alpha/beta hydrolase fold	0	14
PF00642	zf-CCCH	Zinc finger C-x8-C-x5-C-x3-H type (and similar)	0	14
PF00735	Septin	Septin	0	14
PF09380	FERM_C	FERM C-terminal PH-like domain	0	14
PF13365	Trypsin_2	Trypsin-like peptidase domain	0	14
PF00557	Peptidase_M24	Metallopeptidase family M24	0	14
PF01078	Mg_chelatase	Magnesium chelatase, subunit ChlI	0	14
PF00402	Calponin	Calponin family repeat	0	14
PF00538	Linker_histone	linker histone H1 and H5 family	0	14
PF14605	Nup35_RRM_2	Nup53/35/40-type RNA recognition motif	0	14
PF00137	ATP-synt_C	ATP synthase subunit C	0	14
PF00347	Ribosomal_L6	Ribosomal protein L6	0	14
PF02199	SapA	Saposin A-type domain	0	14
PF02883	Alpha_adaptinC2	Adaptin C-terminal domain	0	14
PF14938	SNAP	Soluble NSF attachment protein, SNAP	0	14
PF11838	ERAP1_C	ERAP1-like C-terminal domain	0	14
PF01833	TIG	IPT/TIG domain	0	13
PF00179	UQ_con	Ubiquitin-conjugating enzyme	0	13
PF00147	Fibrinogen_C	Fibrinogen beta and gamma chains, C-terminal globular domain	0	13
PF00652	Ricin_B_lectin	Ricin-type beta-trefoil lectin domain	0	13
PF00689	Cation_ATPase_C	Cation transporting ATPase, C-terminus	0	13
PF03764	EFG_IV	Elongation factor G, domain IV	0	13
PF00572	Ribosomal_L13	Ribosomal protein L13	0	13
PF14374	Ribos_L4_asso_C	60S ribosomal protein L4 C-terminal domain	0	13
PF00573	Ribosomal_L4	Ribosomal protein L4/L1 family	0	13
PF03712	Cu2_monoox_C	Copper type II ascorbate-dependent monooxygenase, C-terminal domain	0	13
PF01082	Cu2_monooxygen	Copper type II ascorbate-dependent monooxygenase, N-terminal domain	0	13
PF04053	Coatomer_WDAD	Coatomer WD associated region	0	13
PF14853	Fis1_TPR_C	Fis1 C-terminal tetratricopeptide repeat	0	13
PF13912	zf-C2H2_6	C2H2-type zinc finger	0	12
PF13847	Methyltransf_31	Methyltransferase domain	0	12
PF00397	WW	WW domain	0	12
PF13649	Methyltransf_25	Methyltransferase domain	0	12
PF00046	Homeobox	Homeobox domain	0	12
PF01593	Amino_oxidase	Flavin containing amine oxidoreductase	0	12
PF13460	NAD_binding_10	NADH(P)-binding	0	12
PF03028	Dynein_heavy	Dynein heavy chain and region D6 of dynein motor	0	12
PF04969	CS	CS domain	0	12
PF13854	Kelch_5	Kelch motif	0	12
PF01636	APH	Phosphotransferase enzyme family	0	12
PF03953	Tubulin_C	Tubulin C-terminal domain	0	12
PF05368	NmrA	NmrA-like family	0	12
PF02779	Transket_pyr	Transketolase, pyrimidine binding domain	0	12
PF00676	E1_dh	Dehydrogenase E1 component	0	12
PF01846	FF	FF domain	0	12
PF00462	Glutaredoxin	Glutaredoxin	0	12
PF11901	DUF3421	Protein of unknown function (DUF3421)	0	12
PF13041	PPR_2	PPR repeat family	0	12
PF02807	ATP-gua_PtransN	ATP:guanido phosphotransferase, N-terminal domain	0	12
PF02020	W2	eIF4-gamma/eIF5/eIF2-epsilon	0	12
PF00217	ATP-gua_Ptrans	ATP:guanido phosphotransferase, C-terminal catalytic domain	0	12
PF00343	Phosphorylase	Carbohydrate phosphorylase	0	12
PF00900	Ribosomal_S4e	Ribosomal family S4e	0	12
PF01282	Ribosomal_S24e	Ribosomal protein S24e	0	12
PF01433	Peptidase_M1	Peptidase family M1	0	12
PF02460	Patched	Patched family	0	12
PF01394	Clathrin_propel	Clathrin propeller repeat	0	12
PF03128	CXCXC	CXCXC repeat	0	11
PF00620	RhoGAP	RhoGAP domain	0	11
PF09439	SRPRB	Signal recognition particle receptor beta subunit	0	11
PF07993	NAD_binding_4	Male sterility protein	0	11
PF05496	RuvB_N	Holliday junction DNA helicase ruvB N-terminus	0	11
PF00125	Histone	Core histone H2A/H2B/H3/H4	0	11
PF00035	dsrm	Double-stranded RNA binding motif	0	11
PF08240	ADH_N	Alcohol dehydrogenase GroES-like domain	0	11
PF05721	PhyH	Phytanoyl-CoA dioxygenase (PhyH)	0	11
PF00899	ThiF	ThiF family	0	11
PF00133	tRNA-synt_1	tRNA synthetases class I (I, L, M and V)	0	11
PF01217	Clat_adaptor_s	Clathrin adaptor complex small chain	0	11
PF00493	MCM	MCM2/3/5 family	0	11
PF01055	Glyco_hydro_31	Glycosyl hydrolases family 31	0	11
PF00564	PB1	PB1 domain	0	11
PF01120	Alpha_L_fucos	Alpha-L-fucosidase	0	11
PF14551	MCM_N	MCM N-terminal domain	0	11
PF00769	ERM	Ezrin/radixin/moesin family	0	11
PF00903	Glyoxalase	Glyoxalase/Bleomycin resistance protein/Dioxygenase superfamily	0	11
PF00188	CAP	Cysteine-rich secretory protein family	0	11
PF00327	Ribosomal_L30	Ribosomal protein L30p/L7e	0	11
PF00932	LTD	Lamin Tail Domain	0	11
PF03947	Ribosomal_L2_C	Ribosomal Proteins L2, C-terminal domain	0	11
PF02800	Gp_dh_C	Glyceraldehyde 3-phosphate dehydrogenase, C-terminal domain	0	11
PF06229	FRG1	FRG1-like family	0	11
PF00305	Lipoxygenase	Lipoxygenase	0	11
PF00330	Aconitase	Aconitase family (aconitate hydratase)	0	11
PF00167	FGF	Fibroblast growth factor	0	11
PF09735	Nckap1	Membrane-associated apoptosis protein	0	11
PF13639	zf-RING_2	Ring finger domain	0	10
PF00226	DnaJ	DnaJ domain	0	10
PF12697	Abhydrolase_6	Alpha/beta hydrolase family	0	10
PF01485	IBR	IBR domain	0	10
PF01266	DAO	FAD dependent oxidoreductase	0	10
PF01073	3Beta_HSD	3-beta hydroxysteroid dehydrogenase/isomerase family	0	10
PF07724	AAA_2	AAA domain (Cdc48 subfamily)	0	10
PF05739	SNARE	SNARE domain	0	10
PF01565	FAD_binding_4	FAD binding domain	0	10
PF00038	Filament	Intermediate filament protein	0	10
PF04712	Radial_spoke	Radial spokehead-like protein	0	10
PF12348	CLASP_N	CLASP N terminal	0	10
PF08564	CDC37_C	Cdc37 C terminal domain	0	10
PF02991	Atg8	Autophagy protein Atg8 ubiquitin like	0	10
PF00281	Ribosomal_L5	Ribosomal protein L5	0	10
PF00180	Iso_dh	Isocitrate/isopropylmalate dehydrogenase	0	10
PF00199	Catalase	Catalase	0	10
PF01092	Ribosomal_S6e	Ribosomal protein S6e	0	10
PF02847	MA3	MA3 domain	0	10
PF01130	CD36	CD36 family	0	10
PF07651	ANTH	ANTH domain	0	10
PF01234	NNMT_PNMT_TEMT	NNMT/PNMT/TEMT family	0	10
PF14523	Syntaxin_2	Syntaxin-like protein	0	10
PF07720	TPR_3	Tetratricopeptide repeat	0	10
PF00003	7tm_3	7 transmembrane sweet-taste receptor of 3 GCPR	0	9
PF13489	Methyltransf_23	Methyltransferase domain	0	9
PF00611	FCH	Fes/CIP4, and EFC/F-BAR homology domain	0	9
PF00808	CBFD_NFYB_HMF	Histone-like transcription factor (CBF/NF-Y) and archaeal histone	0	9
PF00675	Peptidase_M16	Insulinase (Peptidase family M16)	0	9
PF01398	JAB	JAB1/Mov34/MPN/PAD-1 ubiquitin protease	0	9
PF02826	2-Hacid_dh_C	D-isomer specific 2-hydroxyacid dehydrogenase, NAD binding domain	0	9
PF01546	Peptidase_M20	Peptidase family M20/M25/M40	0	9
PF09334	tRNA-synt_1g	tRNA synthetases class I (M)	0	9
PF13671	AAA_33	AAA domain	0	9
PF01044	Vinculin	Vinculin family	0	9
PF10601	zf-LITAF-like	LITAF-like zinc ribbon domain	0	9
PF00587	tRNA-synt_2b	tRNA synthetase class II core domain (G, H, P, S and T)	0	9
PF12872	OST-HTH	OST-HTH/LOTUS domain	0	9
PF00722	Glyco_hydro_16	Glycosyl hydrolases family 16	0	9
PF03051	Peptidase_C1_2	Peptidase C1-like family	0	9
PF01201	Ribosomal_S8e	Ribosomal protein S8e	0	9
PF01216	Calsequestrin	Calsequestrin	0	9
PF00438	S-AdoMet_synt_N	S-adenosylmethionine synthetase, N-terminal domain	0	9
PF02036	SCP2	SCP-2 sterol transfer family	0	9
PF10142	PhoPQ_related	PhoPQ-activated pathogenicity-related protein	0	9
PF00189	Ribosomal_S3_C	Ribosomal protein S3, C-terminal domain	0	9
PF08030	NAD_binding_6	Ferric reductase NAD binding domain	0	9
PF01199	Ribosomal_L34e	Ribosomal protein L34e	0	9
PF10584	Proteasome_A_N	Proteasome subunit A N-terminal signature	0	9
PF08264	Anticodon_1	Anticodon-binding domain of tRNA	0	9
PF00030	Crystall	Beta/Gamma crystallin	0	9
PF08762	CRPV_capsid	CRPV capsid protein like	0	9
PF12349	Sterol-sensing	Sterol-sensing domain of SREBP cleavage-activation	0	9
PF09336	Vps4_C	Vps4 C terminal oligomerisation domain	0	9
PF10517	DM13	Electron transfer DM13	0	9
PF04597	Ribophorin_I	Ribophorin I	0	9
PF10204	DuoxA	Dual oxidase maturation factor	0	9
PF10588	NADH-G_4Fe-4S_3	NADH-ubiquinone oxidoreductase-G iron-sulfur binding region	0	9
PF00415	RCC1	Regulator of chromosome condensation (RCC1) repeat	0	8
PF14560	Ubiquitin_2	Ubiquitin-like domain	0	8
PF01825	GPS	Latrophilin/CL-1-like GPS domain	0	8
PF04548	AIG1	AIG1 family	0	8
PF08242	Methyltransf_12	Methyltransferase domain	0	8
PF01209	Ubie_methyltran	ubiE/COQ5 methyltransferase family	0	8
PF00571	CBS	CBS domain	0	8
PF14580	LRR_9	Leucine-rich repeat	0	8
PF00441	Acyl-CoA_dh_1	Acyl-CoA dehydrogenase, C-terminal domain	0	8
PF02174	IRS	PTB domain (IRS-1 type)	0	8
PF02450	LCAT	Lecithin:cholesterol acyltransferase	0	8
PF09451	ATG27	Autophagy-related protein 27	0	8
PF03131	bZIP_Maf	bZIP Maf transcription factor	0	8
PF00209	SNF	Sodium:neurotransmitter symporter family	0	8
PF02463	SMC_N	RecF/RecN/SMC N terminal domain	0	8
PF02157	Man-6-P_recep	Mannose-6-phosphate receptor	0	8
PF00042	Globin	Globin	0	8
PF03036	Perilipin	Perilipin family	0	8
PF00956	NAP	Nucleosome assembly protein (NAP)	0	8
PF00109	ketoacyl-synt	Beta-ketoacyl synthase, N-terminal domain	0	8
PF06628	Catalase-rel	Catalase-related immune-responsive	0	8
PF00276	Ribosomal_L23	Ribosomal protein L23	0	8
PF02516	STT3	Oligosaccharyl transferase STT3 subunit	0	8
PF01280	Ribosomal_L19e	Ribosomal protein L19e	0	8
PF03939	Ribosomal_L23eN	Ribosomal protein L23, N-terminal domain	0	8
PF00831	Ribosomal_L29	Ribosomal L29 protein	0	8
PF04568	IATP	Mitochondrial ATPase inhibitor, IATP	0	8
PF13183	Fer4_8	4Fe-4S dicluster domain	0	8
PF00725	3HCDH	3-hydroxyacyl-CoA dehydrogenase, C-terminal domain	0	8
PF00044	Gp_dh_N	Glyceraldehyde 3-phosphate dehydrogenase, NAD binding domain	0	8
PF00384	Molybdopterin	Molybdopterin oxidoreductase	0	8
PF01294	Ribosomal_L13e	Ribosomal protein L13e	0	8
PF02852	Pyr_redox_dim	Pyridine nucleotide-disulphide oxidoreductase, dimerisation domain	0	8
PF07065	D123	D123	0	8
PF10455	BAR_2	Bin/amphiphysin/Rvs domain for vesicular trafficking	0	8
PF13599	Pentapeptide_4	Pentapeptide repeats (9 copies)	0	8
PF00338	Ribosomal_S10	Ribosomal protein S10p/S20e	0	8
PF03803	Scramblase	Scramblase	0	8
PF03836	RasGAP_C	RasGAP C-terminus	0	8
PF13632	Glyco_trans_2_3	Glycosyl transferase family group 2	0	8
PF01213	CAP_N	Adenylate cyclase associated (CAP) N terminal	0	8
PF01432	Peptidase_M3	Peptidase family M3	0	8
PF03145	Sina	Seven in absentia protein family	0	8
PF05827	ATP-synt_S1	Vacuolar ATP synthase subunit S1 (ATP6S1)	0	8
PF14697	Fer4_21	4Fe-4S dicluster domain	0	8
PF00053	Laminin_EGF	Laminin EGF-like (Domains III and V)	0	7
PF00612	IQ	IQ calmodulin-binding motif	0	7
PF00665	rve	Integrase core domain	0	7
PF00702	Hydrolase	haloacid dehalogenase-like hydrolase	0	7
PF00788	RA	Ras association (RalGDS/AF-6) domain	0	7
PF00487	FA_desaturase	Fatty acid desaturase	0	7
PF01423	LSM	LSM domain	0	7
PF02854	MIF4G	MIF4G domain	0	7
PF13812	PPR_3	Pentatricopeptide repeat domain	0	7
PF13602	ADH_zinc_N_2	Zinc-binding dehydrogenase	0	7
PF01048	PNP_UDP_1	Phosphorylase superfamily	0	7
PF00175	NAD_binding_1	Oxidoreductase NAD-binding domain	0	7
PF00625	Guanylate_kin	Guanylate kinase	0	7
PF00388	PI-PLC-X	Phosphatidylinositol-specific phospholipase C, X domain	0	7
PF02141	DENN	DENN (AEX-3) domain	0	7
PF07687	M20_dimer	Peptidase dimerisation domain	0	7
PF02412	TSP_3	Thrombospondin type 3 repeat	0	7
PF00657	Lipase_GDSL	GDSL-like Lipase/Acylhydrolase	0	7
PF13851	GAS	Growth-arrest specific micro-tubule binding	0	7
PF10587	EF-1_beta_acid	Eukaryotic elongation factor 1 beta central acidic region	0	7
PF00181	Ribosomal_L2	Ribosomal Proteins L2, RNA binding domain	0	7
PF08565	CDC37_M	Cdc37 Hsp90 binding domain	0	7
PF00235	Profilin	Profilin	0	7
PF03148	Tektin	Tektin family	0	7
PF10417	1-cysPrx_C	C-terminal domain of 1-Cys peroxiredoxin	0	7
PF12831	FAD_oxidored	FAD dependent oxidoreductase	0	7
PF00393	6PGD	6-phosphogluconate dehydrogenase, C-terminal domain	0	7
PF13292	DXP_synthase_N	1-deoxy-D-xylulose-5-phosphate synthase	0	7
PF02773	S-AdoMet_synt_C	S-adenosylmethionine synthetase, C-terminal domain	0	7
PF03946	Ribosomal_L11_N	Ribosomal protein L11, N-terminal domain	0	7
PF13237	Fer4_10	4Fe-4S dicluster domain	0	7
PF08079	Ribosomal_L30_N	Ribosomal L30 N-terminal domain	0	7
PF15238	FAM181	FAM181	0	7
PF08022	FAD_binding_8	FAD-binding domain	0	7
PF00237	Ribosomal_L22	Ribosomal protein L22p/L17e	0	7
PF00333	Ribosomal_S5	Ribosomal protein S5, N-terminal domain	0	7
PF03931	Skp1_POZ	Skp1 family, tetramerisation domain	0	7
PF11978	MVP_shoulder	Shoulder domain	0	7
PF01157	Ribosomal_L21e	Ribosomal protein L21e	0	7
PF01247	Ribosomal_L35Ae	Ribosomal protein L35Ae	0	7
PF01251	Ribosomal_S7e	Ribosomal protein S7e	0	7
PF01599	Ribosomal_S27	Ribosomal protein S27a	0	7
PF05694	SBP56	56kDa selenium binding protein (SBP56)	0	7
PF02990	EMP70	Endomembrane protein 70	0	7
PF03020	LEM	LEM domain	0	7
PF04916	Phospholip_B	Phospholipase B	0	7
PF03129	HGTP_anticodon	Anticodon binding domain	0	7
PF09279	EF-hand_like	Phosphoinositide-specific phospholipase C, efhand-like	0	7
PF13177	DNA_pol3_delta2	DNA polymerase III, delta subunit	0	7
PF01417	ENTH	ENTH domain	0	7
PF01557	FAA_hydrolase	Fumarylacetoacetate (FAA) hydrolase family	0	7
PF13949	ALIX_LYPXL_bnd	ALIX V-shaped domain binding to HIV	0	7
PF00285	Citrate_synt	Citrate synthase	0	7
PF01144	CoA_trans	Coenzyme A transferase	0	7
PF01153	Glypican	Glypican	0	7
PF01873	eIF-5_eIF-2B	Domain found in IF2B/IF5	0	7
PF12569	NARP1	NMDA receptor-regulated protein 1	0	7
PF13600	DUF4140	N-terminal domain of unknown function (DUF4140)	0	7
PF15288	zf-CCHC_6	Zinc knuckle	0	7
PF01056	Myc_N	Myc amino-terminal region	0	7
PF01063	Aminotran_4	Aminotransferase class IV	0	7
PF03227	GILT	Gamma interferon inducible lysosomal thiol reductase (GILT)	0	7
PF03635	Vps35	Vacuolar protein sorting-associated protein 35	0	7
PF00097	zf-C3HC4	Zinc finger, C3HC4 type (RING finger)	0	6
PF00632	HECT	HECT-domain (ubiquitin-transferase)	0	6
PF04851	ResIII	Type III restriction enzyme, res subunit	0	6
PF00617	RasGEF	RasGEF domain	0	6
PF04321	RmlD_sub_bind	RmlD substrate binding domain	0	6
PF13207	AAA_17	AAA domain	0	6
PF00122	E1-E2_ATPase	E1-E2 ATPase	0	6
PF13881	Rad60-SLD_2	Ubiquitin-2 like Rad60 SUMO-like	0	6
PF00433	Pkinase_C	Protein kinase C terminal domain	0	6
PF00627	UBA	UBA/TS-N domain	0	6
PF01412	ArfGap	Putative GTPase activating protein for Arf	0	6
PF01823	MACPF	MAC/Perforin domain	0	6
PF13409	GST_N_2	Glutathione S-transferase, N-terminal domain	0	6
PF04749	PLAC8	PLAC8 family	0	6
PF12678	zf-rbx1	RING-H2 zinc finger	0	6
PF08028	Acyl-CoA_dh_2	Acyl-CoA dehydrogenase, C-terminal domain	0	6
PF02815	MIR	MIR domain	0	6
PF03747	ADP_ribosyl_GH	ADP-ribosylglycohydrolase	0	6
PF03215	Rad17	Rad17 cell cycle checkpoint protein	0	6
PF04547	Anoctamin	Calcium-activated chloride channel	0	6
PF13738	Pyr_redox_3	Pyridine nucleotide-disulphide oxidoreductase	0	6
PF01299	Lamp	Lysosome-associated membrane glycoprotein (Lamp)	0	6
PF03114	BAR	BAR domain	0	6
PF13445	zf-RING_UBOX	RING-type zinc-finger	0	6
PF00152	tRNA-synt_2	tRNA synthetases class II (D, K and N)	0	6
PF02892	zf-BED	BED zinc finger	0	6
PF00132	Hexapep	Bacterial transferase hexapeptide (six repeats)	0	6
PF00780	CNH	CNH domain	0	6
PF01849	NAC	NAC domain	0	6
PF08282	Hydrolase_3	haloacid dehalogenase-like hydrolase	0	6
PF04774	HABP4_PAI-RBP1	Hyaluronan / mRNA binding family	0	6
PF05221	AdoHcyase	S-adenosyl-L-homocysteine hydrolase	0	6
PF00344	SecY	SecY translocase	0	6
PF07978	NIPSNAP	NIPSNAP	0	6
PF01134	GIDA	Glucose inhibited division protein A	0	6
PF03446	NAD_binding_2	NAD binding domain of 6-phosphogluconate dehydrogenase	0	6
PF01284	MARVEL	Membrane-associating domain	0	6
PF02772	S-AdoMet_synt_M	S-adenosylmethionine synthetase, central domain	0	6
PF02780	Transketolase_C	Transketolase, C-terminal domain	0	6
PF00177	Ribosomal_S7	Ribosomal protein S7p/S5e	0	6
PF00298	Ribosomal_L11	Ribosomal protein L11, RNA binding domain	0	6
PF03719	Ribosomal_S5_C	Ribosomal protein S5, C-terminal domain	0	6
PF06068	TIP49	TIP49 C-terminus	0	6
PF01158	Ribosomal_L36e	Ribosomal protein L36e	0	6
PF08523	MBF1	Multiprotein bridging factor 1	0	6
PF01105	EMP24_GP25L	emp24/gp25L/p24 family/GOLD	0	6
PF00198	2-oxoacid_dh	2-oxoacid dehydrogenases acyltransferase (catalytic domain)	0	6
PF00157	Pou	Pou domain - N-terminal to homeobox domain	0	6
PF00804	Syntaxin	Syntaxin	0	6
PF00478	IMPDH	IMP dehydrogenase / GMP reductase domain	0	6
PF08442	ATP-grasp_2	ATP-grasp domain	0	6
PF13620	CarboxypepD_reg	Carboxypeptidase regulatory-like domain	0	6
PF07676	PD40	WD40-like Beta Propeller Repeat	0	6
PF01575	MaoC_dehydratas	MaoC like domain	0	6
PF02188	GoLoco	GoLoco motif	0	6
PF02828	L27	L27 domain	0	6
PF03348	Serinc	Serine incorporator (Serinc)	0	6
PF04601	DUF569	Protein of unknown function (DUF569)	0	6
PF06957	COPI_C	Coatomer (COPI) alpha subunit C-terminus	0	6
PF12837	Fer4_6	4Fe-4S binding domain	0	6
PF14541	TAXi_C	Xylanase inhibitor C-terminal	0	6
PF14566	PTPlike_phytase	Inositol hexakisphosphate	0	6
PF00464	SHMT	Serine hydroxymethyltransferase	0	6
PF00651	BTB	BTB/POZ domain	0	5
PF00884	Sulfatase	Sulfatase	0	5
PF01661	Macro	Macro domain	0	5
PF05699	Dimer_Tnp_hAT	hAT family C-terminal dimerisation region	0	5
PF13086	AAA_11	AAA domain	0	5
PF01501	Glyco_transf_8	Glycosyl transferase family 8	0	5
PF13229	Beta_helix	Right handed beta helix region	0	5
PF00615	RGS	Regulator of G protein signaling domain	0	5
PF13091	PLDc_2	PLD-like domain	0	5
PF02822	Antistasin	Antistasin family	0	5
PF04389	Peptidase_M28	Peptidase family M28	0	5
PF00679	EFG_C	Elongation factor G C-terminus	0	5
PF00264	Tyrosinase	Common central domain of tyrosinase	0	5
PF02170	PAZ	PAZ domain	0	5
PF00385	Chromo	Chromo (CHRromatin Organisation MOdifier) domain	0	5
PF00406	ADK	Adenylate kinase	0	5
PF03564	DUF1759	Protein of unknown function (DUF1759)	0	5
PF13193	AMP-binding_C	AMP-binding enzyme C-terminal domain	0	5
PF00535	Glycos_transf_2	Glycosyl transferase family 2	0	5
PF01569	PAP2	PAP2 superfamily	0	5
PF13641	Glyco_tranf_2_3	Glycosyltransferase like family 2	0	5
PF01335	DED	Death effector domain	0	5
PF01699	Na_Ca_ex	Sodium/calcium exchanger protein	0	5
PF00680	RdRP_1	RNA dependent RNA polymerase	0	5
PF02806	Alpha-amylase_C	Alpha amylase, C-terminal all-beta domain	0	5
PF00037	Fer4	4Fe-4S binding domain	0	5
PF00274	Glycolytic	Fructose-bisphosphate aldolase class-I	0	5
PF00194	Carb_anhydrase	Eukaryotic-type carbonic anhydrase	0	5
PF00736	EF1_GNE	EF-1 guanine nucleotide exchange domain	0	5
PF09066	B2-adapt-app_C	Beta2-adaptin appendage, C-terminal sub-domain	0	5
PF00910	RNA_helicase	RNA helicase	0	5
PF09342	DUF1986	Domain of unknown function (DUF1986)	0	5
PF10302	DUF2407	DUF2407 ubiquitin-like domain	0	5
PF01027	Bax1-I	Inhibitor of apoptosis-promoting Bax1	0	5
PF00838	TCTP	Translationally controlled tumour protein	0	5
PF02209	VHP	Villin headpiece domain	0	5
PF02736	Myosin_N	Myosin N-terminal SH3-like domain	0	5
PF13669	Glyoxalase_4	Glyoxalase/Bleomycin resistance protein/Dioxygenase superfamily	0	5
PF00162	PGK	Phosphoglycerate kinase	0	5
PF00647	EF1G	Elongation factor 1 gamma, conserved domain	0	5
PF01929	Ribosomal_L14e	Ribosomal protein L14	0	5
PF02747	PCNA_C	Proliferating cell nuclear antigen, C-terminal domain	0	5
PF02737	3HCDH_N	3-hydroxyacyl-CoA dehydrogenase, NAD binding domain	0	5
PF00380	Ribosomal_S9	Ribosomal protein S9/S16	0	5
PF00456	Transketolase_N	Transketolase, thiamine diphosphate binding domain	0	5
PF00883	Peptidase_M17	Cytosol aminopeptidase family, catalytic domain	0	5
PF01459	Porin_3	Eukaryotic porin	0	5
PF01588	tRNA_bind	Putative tRNA binding domain	0	5
PF00238	Ribosomal_L14	Ribosomal protein L14p/L23e	0	5
PF00673	Ribosomal_L5_C	ribosomal L5P family C-terminus	0	5
PF00224	PK	Pyruvate kinase, barrel domain	0	5
PF01090	Ribosomal_S19e	Ribosomal protein S19e	0	5
PF01655	Ribosomal_L32e	Ribosomal protein L32	0	5
PF02167	Cytochrom_C1	Cytochrome C1 family	0	5
PF02910	Succ_DH_flav_C	Fumarate reductase flavoprotein C-term	0	5
PF03271	EB1	EB1-like C-terminal motif	0	5
PF04758	Ribosomal_S30	Ribosomal protein S30	0	5
PF05091	eIF-3_zeta	Eukaryotic translation initiation factor 3 subunit 7 (eIF-3)	0	5
PF08071	RS4NT	RS4NT (NUC023) domain	0	5
PF07830	PP2C_C	Protein serine/threonine phosphatase 2C, C-terminal domain	0	5
PF00066	Notch	LNR domain	0	5
PF00387	PI-PLC-Y	Phosphatidylinositol-specific phospholipase C, Y domain	0	5
PF00568	WH1	WH1 domain	0	5
PF01336	tRNA_anti-codon	OB-fold nucleic acid binding domain	0	5
PF03600	CitMHS	Citrate transporter	0	5
PF13802	Gal_mutarotas_2	Galactose mutarotase-like	0	5
PF01749	IBB	Importin beta binding domain	0	5
PF01794	Ferric_reduct	Ferric reductase like transmembrane component	0	5
PF03200	Glyco_hydro_63	Mannosyl oligosaccharide glucosidase	0	5
PF05577	Peptidase_S28	Serine carboxypeptidase S28	0	5
PF08441	Integrin_alpha2	Integrin alpha	0	5
PF10585	UBA_e1_thiolCys	Ubiquitin-activating enzyme active site	0	5
PF00970	FAD_binding_6	Oxidoreductase FAD-binding domain	0	5
PF02040	ArsB	Arsenical pump membrane protein	0	5
PF02089	Palm_thioest	Palmitoyl protein thioesterase	0	5
PF06456	Arfaptin	Arfaptin-like domain	0	5
PF08337	Plexin_cytopl	Plexin cytoplasmic RasGAP domain	0	5
PF10644	Misat_Tub_SegII	Misato Segment II tubulin-like domain	0	5
PF13793	Pribosyltran_N	N-terminal domain of ribose phosphate pyrophosphokinase	0	5
PF14572	Pribosyl_synth	Phosphoribosyl synthetase-associated domain	0	5
PF03127	GAT	GAT domain	0	5
PF08031	BBE	Berberine and berberine like	0	5
PF08127	Propeptide_C1	Peptidase family C1 propeptide	0	5
PF13361	UvrD_C	UvrD-like helicase C-terminal domain	0	5
PF13472	Lipase_GDSL_2	GDSL-like Lipase/Acylhydrolase family	0	5
PF13474	SnoaL_3	SnoaL-like domain	0	5
PF13598	DUF4139	Domain of unknown function (DUF4139)	0	5
PF14602	Hexapep_2	Hexapeptide repeat of succinyl-transferase	0	5
PF00351	Biopterin_H	Biopterin-dependent aromatic amino acid hydroxylase	0	5
PF00479	G6PD_N	Glucose-6-phosphate dehydrogenase, NAD binding domain	0	5
PF01642	MM_CoA_mutase	Methylmalonyl-CoA mutase	0	5
PF02781	G6PD_C	Glucose-6-phosphate dehydrogenase, C-terminal domain	0	5
PF05002	SGS	SGS domain	0	5
PF08512	Rtt106	Histone chaperone Rttp106-like	0	5
PF09731	Mitofilin	Mitochondrial inner membrane protein	0	5
PF13908	Shisa	Wnt and FGF inhibitory regulator	0	5
PF14772	NYD-SP28	Sperm tail	0	5
PF00342	PGI	Phosphoglucose isomerase	0	5
PF01991	vATP-synt_E	ATP synthase (E/31 kDa) subunit	0	5
PF03995	Inhibitor_I36	Peptidase inhibitor family I36	0	5
PF04209	HgmA	homogentisate 1,2-dioxygenase	0	5
PF05817	Ribophorin_II	Oligosaccharyltransferase subunit Ribophorin II	0	5
PF07994	NAD_binding_5	Myo-inositol-1-phosphate synthase	0	5
PF09268	Clathrin-link	Clathrin, heavy-chain linker	0	5
PF14619	SnAC	Snf2-ATP coupling, chromatin remodelling complex	0	5
PF14833	NAD_binding_11	NAD-binding of NADP-dependent 3-hydroxyisobutyrate dehydrogenase	0	5
PF00078	RVT_1	Reverse transcriptase (RNA-dependent DNA polymerase)	0	4
PF00656	Peptidase_C14	Caspase domain	0	4
PF00130	C1_1	Phorbol esters/diacylglycerol binding domain (C1 domain)	0	4
PF02210	Laminin_G_2	Laminin G domain	0	4
PF00176	SNF2_N	SNF2 family N-terminal domain	0	4
PF08393	DHC_N2	Dynein heavy chain, N-terminal region 2	0	4
PF00054	Laminin_G_1	Laminin G domain	0	4
PF00439	Bromodomain	Bromodomain	0	4
PF01734	Patatin	Patatin-like phospholipase	0	4
PF00173	Cyt-b5	Cytochrome b5-like Heme/Steroid binding domain	0	4
PF12777	MT	Microtubule-binding stalk of dynein motor	0	4
PF13304	AAA_21	AAA domain	0	4
PF02719	Polysacc_synt_2	Polysaccharide biosynthesis protein	0	4
PF12781	AAA_9	ATP-binding dynein motor region D5	0	4
PF00454	PI3_PI4_kinase	Phosphatidylinositol 3- and 4-kinase	0	4
PF14704	DERM	Dermatopontin	0	4
PF00202	Aminotran_3	Aminotransferase class-III	0	4
PF02738	Ald_Xan_dh_C2	Molybdopterin-binding domain of aldehyde dehydrogenase	0	4
PF00350	Dynamin_N	Dynamin family	0	4
PF00362	Integrin_beta	Integrin, beta chain	0	4
PF02181	FH2	Formin Homology 2 Domain	0	4
PF05380	Peptidase_A17	Pao retrotransposon peptidase	0	4
PF13582	Reprolysin_3	Metallo-peptidase family M12B Reprolysin-like	0	4
PF01562	Pep_M12B_propep	Reprolysin family propeptide	0	4
PF03810	IBN_N	Importin-beta N-terminal domain	0	4
PF00111	Fer2	2Fe-2S iron-sulfur cluster binding domain	0	4
PF00355	Rieske	Rieske [2Fe-2S] domain	0	4
PF01915	Glyco_hydro_3_C	Glycosyl hydrolase family 3 C-terminal domain	0	4
PF01946	Thi4	Thi4 family	0	4
PF00909	Ammonium_transp	Ammonium Transporter Family	0	4
PF04130	Spc97_Spc98	Spc97 / Spc98 family	0	4
PF00613	PI3Ka	Phosphoinositide 3-kinase family, accessory domain (PIK domain)	0	4
PF00784	MyTH4	MyTH4 domain	0	4
PF03171	2OG-FeII_Oxy	2OG-Fe(II) oxygenase superfamily	0	4
PF12012	DUF3504	Domain of unknown function (DUF3504)	0	4
PF00156	Pribosyltran	Phosphoribosyl transferase domain	0	4
PF00850	Hist_deacetyl	Histone deacetylase domain	0	4
PF03403	PAF-AH_p_II	Platelet-activating factor acetylhydrolase, isoform II	0	4
PF08725	Integrin_b_cyt	Integrin beta cytoplasmic domain	0	4
PF12770	CHAT	CHAT domain	0	4
PF01403	Sema	Sema domain	0	4
PF00128	Alpha-amylase	Alpha amylase, catalytic domain	0	4
PF01496	V_ATPase_I	V-type ATPase 116kDa subunit family	0	4
PF01323	DSBA	DSBA-like thioredoxin domain	0	4
PF06747	CHCH	CHCH domain	0	4
PF02629	CoA_binding	CoA binding domain	0	4
PF00549	Ligase_CoA	CoA-ligase	0	4
PF00150	Cellulase	Cellulase (glycosyl hydrolase family 5)	0	4
PF08726	EFhand_Ca_insen	Ca2+ insensitive EF hand	0	4
PF00694	Aconitase_C	Aconitase C-terminal domain	0	4
PF01253	SUI1	Translation initiation factor SUI1	0	4
PF02046	COX6A	Cytochrome c oxidase subunit VIa	0	4
PF00031	Cystatin	Cystatin domain	0	4
PF00231	ATP-synt	ATP synthase	0	4
PF00719	Pyrophosphatase	Inorganic pyrophosphatase	0	4
PF01086	Clathrin_lg_ch	Clathrin light chain	0	4
PF01777	Ribosomal_L27e	Ribosomal L27e protein family	0	4
PF02198	SAM_PNT	Sterile alpha motif (SAM)/Pointed domain	0	4
PF00670	AdoHcyase_NAD	S-adenosyl-L-homocysteine hydrolase, NAD binding domain	0	4
PF13012	MitMem_reg	Maintenance of mitochondrial structure and function	0	4
PF00756	Esterase	Putative esterase	0	4
PF00996	GDI	GDP dissociation inhibitor	0	4
PF02115	Rho_GDI	RHO protein GDP dissociation inhibitor	0	4
PF02121	IP_trans	Phosphatidylinositol transfer protein	0	4
PF13378	MR_MLE_C	Enolase C-terminal domain-like	0	4
PF00113	Enolase_C	Enolase, C-terminal TIM barrel domain	0	4
PF00312	Ribosomal_S15	Ribosomal protein S15	0	4
PF00411	Ribosomal_S11	Ribosomal protein S11	0	4
PF00821	PEPCK	Phosphoenolpyruvate carboxykinase	0	4
PF02777	Sod_Fe_C	Iron/manganese superoxide dismutases, C-terminal domain	0	4
PF00255	GSHPx	Glutathione peroxidase	0	4
PF01287	eIF-5a	Eukaryotic elongation factor 5A hypusine, DNA-binding OB fold	0	4
PF03297	Ribosomal_S25	S25 ribosomal protein	0	4
PF00121	TIM	Triosephosphate isomerase	0	4
PF00935	Ribosomal_L44	Ribosomal protein L44	0	4
PF01198	Ribosomal_L31e	Ribosomal protein L31e	0	4
PF01776	Ribosomal_L22e	Ribosomal L22e protein family	0	4
PF03345	DDOST_48kD	Oligosaccharyltransferase 48 kDa subunit beta	0	4
PF03952	Enolase_N	Enolase, N-terminal domain	0	4
PF05719	GPP34	Golgi phosphoprotein 3 (GPP34)	0	4
PF08069	Ribosomal_S13_N	Ribosomal S13/S15 N-terminal domain	0	4
PF00550	PP-binding	Phosphopantetheine attachment site	0	4
PF03456	uDENN	uDENN domain	0	4
PF04193	PQ-loop	PQ loop repeat	0	4
PF04998	RNA_pol_Rpb1_5	RNA polymerase Rpb1, domain 5	0	4
PF14622	Ribonucleas_3_3	Ribonuclease-III-like	0	4
PF01477	PLAT	PLAT/LH2 domain	0	4
PF03637	Mob1_phocein	Mob1/phocein family	0	4
PF04427	Brix	Brix domain	0	4
PF00562	RNA_pol_Rpb2_6	RNA polymerase Rpb2, domain 6	0	4
PF01652	IF4E	Eukaryotic initiation factor 4E	0	4
PF15409	PH_8	Pleckstrin homology domain	0	4
PF01221	Dynein_light	Dynein light chain type 1	0	4
PF02886	LBP_BPI_CETP_C	LBP / BPI / CETP family, C-terminal domain	0	4
PF12352	V-SNARE_C	Snare region anchored in the vesicle membrane C-terminus	0	4
PF12800	Fer4_4	4Fe-4S binding domain	0	4
PF00110	wnt	wnt family	0	4
PF00458	WHEP-TRS	WHEP-TRS domain	0	4
PF00959	Phage_lysozyme	Phage lysozyme	0	4
PF01262	AlaDh_PNT_C	Alanine dehydrogenase/PNT, C-terminal domain	0	4
PF08487	VIT	Vault protein inter-alpha-trypsin domain	0	4
PF00791	ZU5	ZU5 domain	0	4
PF01411	tRNA-synt_2c	tRNA synthetases class II (A)	0	4
PF07726	AAA_3	ATPase family associated with various cellular activities (AAA)	0	4
PF09294	Interfer-bind	Interferon-alpha/beta receptor, fibronectin type III	0	4
PF00365	PFK	Phosphofructokinase	0	4
PF01187	MIF	Macrophage migration inhibitory factor (MIF)	0	4
PF01404	Ephrin_lbd	Ephrin receptor ligand binding domain	0	4
PF02755	RPEL	RPEL repeat	0	4
PF08332	CaMKII_AD	Calcium/calmodulin dependent protein kinase II Association	0	4
PF11938	DUF3456	TLR4 regulator and MIR-interacting MSAP	0	4
PF12265	CAF1C_H4-bd	Histone-binding protein RBBP4 or subunit C of CAF1 complex	0	4
PF13844	Glyco_transf_41	Glycosyl transferase family 41	0	4
PF00728	Glyco_hydro_20	Glycosyl hydrolase family 20, catalytic domain	0	4
PF01139	RtcB	tRNA-splicing ligase RtcB	0	4
PF01406	tRNA-synt_1e	tRNA synthetases class I (C) catalytic domain	0	4
PF04190	DUF410	Protein of unknown function (DUF410)	0	4
PF04912	Dynamitin	Dynamitin	0	4
PF09818	ABC_ATPase	Predicted ATPase of the ABC class	0	4
PF10456	BAR_3_WASP_bdg	WASP-binding domain of Sorting nexin protein	0	4
PF13506	Glyco_transf_21	Glycosyl transferase family 21	0	4
PF00163	Ribosomal_S4	Ribosomal protein S4/S9 N-terminal domain	0	4
PF00810	ER_lumen_recept	ER lumen protein retaining receptor	0	4
PF01658	Inos-1-P_synth	Myo-inositol-1-phosphate synthase	0	4
PF02630	SCO1-SenC	SCO1/SenC	0	4
PF02887	PK_C	Pyruvate kinase, alpha/beta domain	0	4
PF02978	SRP_SPB	Signal peptide binding domain	0	4
PF03223	V-ATPase_C	V-ATPase subunit C	0	4
PF03332	PMM	Eukaryotic phosphomannomutase	0	4
PF04045	P34-Arc	Arp2/3 complex, 34 kD subunit p34-Arc	0	4
PF04104	DNA_primase_lrg	Eukaryotic and archaeal DNA primase, large subunit	0	4
PF04121	Nup84_Nup100	Nuclear pore protein 84 / 107	0	4
PF04515	Choline_transpo	Plasma-membrane choline transporter	0	4
PF04880	NUDE_C	NUDE protein, C-terminal conserved region	0	4
PF06202	GDE_C	Amylo-alpha-1,6-glucosidase	0	4
PF07527	Hairy_orange	Hairy Orange	0	4
PF09058	L27_1	L27_1	0	4
PF09280	XPC-binding	XPC-binding domain	0	4
PF10252	PP28	Casein kinase substrate phosphoprotein PP28	0	4
PF11608	Limkain-b1	Limkain b1	0	4
PF12465	Pr_beta_C	Proteasome beta subunits C terminal	0	4
PF13454	NAD_binding_9	FAD-NAD(P)-binding	0	4
PF13538	UvrD_C_2	UvrD-like helicase C-terminal domain	0	4
PF14671	DSPn	Dual specificity protein phosphatase, N-terminal half	0	4
PF05172	Nup35_RRM	Nup53/35/40-type RNA recognition motif	0	4
PF00002	7tm_2	7 transmembrane receptor (Secretin family)	0	3
PF00567	TUDOR	Tudor domain	0	3
PF01442	Apolipoprotein	Apolipoprotein A1/A4/E domain	0	3
PF13087	AAA_12	AAA domain	0	3
PF02809	UIM	Ubiquitin interaction motif	0	3
PF03184	DDE_1	DDE superfamily endonuclease	0	3
PF07727	RVT_2	Reverse transcriptase (RNA-dependent DNA polymerase)	0	3
PF00581	Rhodanese	Rhodanese-like domain	0	3
PF00650	CRAL_TRIO	CRAL/TRIO domain	0	3
PF13306	LRR_5	Leucine rich repeats (6 copies)	0	3
PF01457	Peptidase_M8	Leishmanolysin	0	3
PF13574	Reprolysin_2	Metallo-peptidase family M12B Reprolysin-like	0	3
PF13688	Reprolysin_5	Metallo-peptidase family M12	0	3
PF01852	START	START domain	0	3
PF00233	PDEase_I	3'5'-cyclic nucleotide phosphodiesterase	0	3
PF00291	PALP	Pyridoxal-phosphate dependent enzyme	0	3
PF01135	PCMT	Protein-L-isoaspartate(D-aspartate) O-methyltransferase (PCMT)	0	3
PF02415	Chlam_PMP	Chlamydia polymorphic membrane protein (Chlamydia_PMP) repeat	0	3
PF13238	AAA_18	AAA domain	0	3
PF02574	S-methyl_trans	Homocysteine S-methyltransferase	0	3
PF00334	NDK	Nucleoside diphosphate kinase	0	3
PF01239	PPTA	Protein prenyltransferase alpha subunit repeat	0	3
PF01421	Reprolysin	Reprolysin (M12B) family zinc metalloprotease	0	3
PF14529	Exo_endo_phos_2	Endonuclease-reverse transcriptase	0	3
PF00619	CARD	Caspase recruitment domain	0	3
PF00616	RasGAP	GTPase-activator protein for Ras-like GTPase	0	3
PF05920	Homeobox_KN	Homeobox KN domain	0	3
PF13520	AA_permease_2	Amino acid permease	0	3
PF00136	DNA_pol_B	DNA polymerase family B	0	3
PF00403	HMA	Heavy-metal-associated domain	0	3
PF11969	DcpS_C	Scavenger mRNA decapping enzyme C-term binding	0	3
PF00635	Motile_Sperm	MSP (Major sperm protein) domain	0	3
PF00933	Glyco_hydro_3	Glycosyl hydrolase family 3 N terminal domain	0	3
PF00957	Synaptobrevin	Synaptobrevin	0	3
PF02065	Melibiase	Melibiase	0	3
PF03104	DNA_pol_B_exo1	DNA polymerase family B, exonuclease domain	0	3
PF02136	NTF2	Nuclear transport factor 2 (NTF2) domain	0	3
PF02466	Tim17	Tim17/Tim22/Tim23/Pmp24 family	0	3
PF00690	Cation_ATPase_N	Cation transporter/ATPase, N-terminus	0	3
PF13469	Sulfotransfer_3	Sulfotransferase family	0	3
PF02936	COX4	Cytochrome c oxidase subunit IV	0	3
PF02668	TauD	Taurine catabolism dioxygenase TauD, TfdA family	0	3
PF04110	APG12	Ubiquitin-like autophagy protein Apg12	0	3
PF07915	PRKCSH	Glucosidase II beta subunit-like protein	0	3
PF00316	FBPase	Fructose-1-6-bisphosphatase	0	3
PF01381	HTH_3	Helix-turn-helix	0	3
PF13534	Fer4_17	4Fe-4S dicluster domain	0	3
PF13560	HTH_31	Helix-turn-helix domain	0	3
PF15353	HECA	Headcase protein family homologue	0	3
PF09360	zf-CDGSH	Iron-binding zinc finger CDGSH type	0	3
PF01920	Prefoldin_2	Prefoldin subunit	0	3
PF02171	Piwi	Piwi domain	0	3
PF05347	Complex1_LYR	Complex 1 protein (LYR family)	0	3
PF14492	EFG_II	Elongation Factor G, domain II	0	3
PF00306	ATP-synt_ab_C	ATP synthase alpha/beta chain, C terminal domain	0	3
PF00684	DnaJ_CXXCXGXG	DnaJ central domain	0	3
PF04784	DUF547	Protein of unknown function, DUF547	0	3
PF03234	CDC37_N	Cdc37 N terminal kinase binding	0	3
PF04139	Rad9	Rad9	0	3
PF08736	FA	FERM adjacent (FA)	0	3
PF00034	Cytochrom_C	Cytochrome c	0	3
PF00213	OSCP	ATP synthase delta (OSCP) subunit	0	3
PF00416	Ribosomal_S13	Ribosomal protein S13/S18	0	3
PF00827	Ribosomal_L15e	Ribosomal L15	0	3
PF00833	Ribosomal_S17e	Ribosomal S17	0	3
PF01127	Sdh_cyt	Succinate dehydrogenase/Fumarate reductase transmembrane subunit	0	3
PF01215	COX5B	Cytochrome c oxidase subunit Vb	0	3
PF02284	COX5A	Cytochrome c oxidase subunit Va	0	3
PF02453	Reticulon	Reticulon	0	3
PF02823	ATP-synt_DE_N	ATP synthase, Delta/Epsilon chain, beta-sandwich domain	0	3
PF02921	UCR_TM	Ubiquinol cytochrome reductase transmembrane region	0	3
PF04062	P21-Arc	ARP2/3 complex ARPC3 (21 kDa) subunit	0	3
PF04699	P16-Arc	ARP2/3 complex 16 kDa subunit (p16-Arc)	0	3
PF05404	TRAP-delta	Translocon-associated protein, delta subunit precursor (TRAP-delta)	0	3
PF05405	Mt_ATP-synt_B	Mitochondrial ATP synthase B chain precursor (ATP-synt_B)	0	3
PF05511	ATP-synt_F6	Mitochondrial ATP synthase coupling factor 6	0	3
PF05873	Mt_ATP-synt_D	ATP synthase D chain, mitochondrial (ATP5H)	0	3
PF07742	BTG	BTG family	0	3
PF08075	NOPS	NOPS (NUC059) domain	0	3
PF05517	p25-alpha	p25-alpha	0	3
PF05783	DLIC	Dynein light intermediate chain (DLIC)	0	3
PF00117	GATase	Glutamine amidotransferase class-I	0	3
PF00579	tRNA-synt_1b	tRNA synthetases class I (W and Y)	0	3
PF01230	HIT	HIT domain	0	3
PF12850	Metallophos_2	Calcineurin-like phosphoesterase superfamily domain	0	3
PF01039	Carboxyl_trans	Carboxyl transferase domain	0	3
PF01074	Glyco_hydro_38	Glycosyl hydrolases family 38 N-terminal domain	0	3
PF02274	Amidinotransf	Amidinotransferase	0	3
PF03097	BRO1	BRO1-like domain	0	3
PF00230	MIP	Major intrinsic protein	0	3
PF02197	RIIa	Regulatory subunit of type II PKA R-subunit	0	3
PF03024	Folate_rec	Folate receptor family	0	3
PF03770	IPK	Inositol polyphosphate kinase	0	3
PF04030	ALO	D-arabinono-1,4-lactone oxidase	0	3
PF04042	DNA_pol_E_B	DNA polymerase alpha/epsilon subunit B	0	3
PF05978	UNC-93	Ion channel regulatory protein UNC-93	0	3
PF08544	GHMP_kinases_C	GHMP kinases C terminal	0	3
PF01067	Calpain_III	Calpain large subunit, domain III	0	3
PF03645	Tctex-1	Tctex-1 family	0	3
PF00389	2-Hacid_dh	D-isomer specific 2-hydroxyacid dehydrogenase, catalytic domain	0	3
PF00875	DNA_photolyase	DNA photolyase	0	3
PF01030	Recep_L_domain	Receptor L domain	0	3
PF01965	DJ-1_PfpI	DJ-1/PfpI family	0	3
PF02114	Phosducin	Phosducin	0	3
PF03567	Sulfotransfer_2	Sulfotransferase family	0	3
PF05222	AlaDh_PNT_N	Alanine dehydrogenase/PNT, N-terminal domain	0	3
PF05406	WGR	WGR domain	0	3
PF08150	FerB	FerB (NUC096) domain	0	3
PF08151	FerI	FerI (NUC094) domain	0	3
PF08542	Rep_fac_C	Replication factor C C-terminal domain	0	3
PF13434	K_oxygenase	L-lysine 6-monooxygenase (NADPH-requiring)	0	3
PF13640	2OG-FeII_Oxy_3	2OG-Fe(II) oxygenase superfamily	0	3
PF02423	OCD_Mu_crystall	Ornithine cyclodeaminase/mu-crystallin family	0	3
PF02785	Biotin_carb_C	Biotin carboxylase C-terminal domain	0	3
PF03486	HI0933_like	HI0933-like protein	0	3
PF00093	VWC	von Willebrand factor type C domain	0	3
PF00120	Gln-synt_C	Glutamine synthetase, catalytic domain	0	3
PF00206	Lyase_1	Lyase	0	3
PF01466	Skp1	Skp1 family, dimerisation domain	0	3
PF03134	TB2_DP1_HVA22	TB2/DP1, HVA22 family	0	3
PF03987	Autophagy_act_C	Autophagocytosis associated protein, active-site domain	0	3
PF05191	ADK_lid	Adenylate kinase, active site lid	0	3
PF05195	AMP_N	Aminopeptidase P, N-terminal domain	0	3
PF05478	Prominin	Prominin	0	3
PF06544	DUF1115	Protein of unknown function (DUF1115)	0	3
PF07002	Copine	Copine	0	3
PF08603	CAP_C	Adenylate cyclase associated (CAP) C terminal	0	3
PF09090	MIF4G_like_2	MIF4G like	0	3
PF09286	Pro-kuma_activ	Pro-kumamolisin, activation domain	0	3
PF12474	PKK	Polo kinase kinase	0	3
PF13173	AAA_14	AAA domain	0	3
PF13603	tRNA-synt_1_2	Leucyl-tRNA synthetase, Domain 2	0	3
PF13838	Clathrin_H_link	Clathrin-H-link	0	3
PF14775	NYD-SP28_assoc	Sperm tail C-terminal domain	0	3
PF02233	PNTB	NAD(P) transhydrogenase beta subunit	0	3
PF03731	Ku_N	Ku70/Ku80 N-terminal alpha/beta domain	0	3
PF00346	Complex1_49kDa	Respiratory-chain NADH dehydrogenase, 49 Kd subunit	0	3
PF00372	Hemocyanin_M	Hemocyanin, copper containing domain	0	3
PF00857	Isochorismatase	Isochorismatase family	0	3
PF01115	F_actin_cap_B	F-actin capping protein, beta subunit	0	3
PF01150	GDA1_CD39	GDA1/CD39 (nucleoside phosphatase) family	0	3
PF01267	F-actin_cap_A	F-actin capping protein alpha subunit	0	3
PF01592	NifU_N	NifU-like N terminal domain	0	3
PF01650	Peptidase_C13	Peptidase C13 family	0	3
PF02055	Glyco_hydro_30	O-Glycosyl hydrolase family 30	0	3
PF02296	Alpha_adaptin_C	Alpha adaptin AP2, C-terminal domain	0	3
PF02359	CDC48_N	Cell division protein 48 (CDC48), N-terminal domain	0	3
PF02833	DHHA2	DHHA2 domain	0	3
PF02867	Ribonuc_red_lgC	Ribonucleotide reductase, barrel domain	0	3
PF03179	V-ATPase_G	Vacuolar (H+)-ATPase G subunit	0	3
PF03261	CDK5_activator	Cyclin-dependent kinase 5 activator protein	0	3
PF03398	Ist1	Regulator of Vps4 activity in the MVB pathway	0	3
PF03727	Hexokinase_2	Hexokinase	0	3
PF04091	Sec15	Exocyst complex subunit Sec15-like	0	3
PF04845	PurA	PurA ssDNA and RNA-binding protein	0	3
PF04855	SNF5	SNF5 / SMARCB1 / INI1	0	3
PF05038	Cytochrom_B558a	Cytochrome Cytochrome b558 alpha-subunit	0	3
PF06384	ICAT	Beta-catenin-interacting protein ICAT	0	3
PF07888	CALCOCO1	Calcium binding and coiled-coil domain (CALCOCO1) like	0	3
PF08390	TRAM1	TRAM1-like protein	0	3
PF08572	PRP3	pre-mRNA processing factor 3 (PRP3)	0	3
PF08621	RPAP1_N	RPAP1-like, N-terminal	0	3
PF08644	SPT16	FACT complex subunit (SPT16/CDC68)	0	3
PF08752	COP-gamma_platf	Coatomer gamma subunit appendage platform subdomain	0	3
PF09127	Leuk-A4-hydro_C	Leukotriene A4 hydrolase, C-terminal	0	3
PF09270	BTD	Beta-trefoil DNA-binding domain	0	3
PF09298	FAA_hydrolase_N	Fumarylacetoacetase N-terminal	0	3
PF09429	Wbp11	WW domain binding protein 11	0	3
PF09431	DUF2013	Protein of unknown function (DUF2013)	0	3
PF09454	Vps23_core	Vps23 core domain	0	3
PF09507	CDC27	DNA polymerase subunit Cdc27	0	3
PF09606	Med15	ARC105 or Med15 subunit of Mediator complex non-fungal	0	3
PF10266	Strumpellin	Hereditary spastic paraplegia protein strumpellin	0	3
PF11029	DAZAP2	DAZ associated protein 2 (DAZAP2)	0	3
PF11698	V-ATPase_H_C	V-ATPase subunit H	0	3
PF12329	TMF_DNA_bd	TATA element modulatory factor 1 DNA binding	0	3
PF12619	MCM2_N	Mini-chromosome maintenance protein 2	0	3
PF12719	Cnd3	Nuclear condensing complex subunits, C-term domain	0	3
PF13510	Fer2_4	2Fe-2S iron-sulfur cluster binding domain	0	3
PF14802	TMEM192	TMEM192 family	0	3
PF14932	HAUS-augmin3	HAUS augmin-like complex subunit 3	0	3
PF15313	HEXIM	Hexamethylene bis-acetamide-inducible protein	0	3
PF15519	RBM39linker	linker between RRM2 and RRM3 domains in RBM39 protein	0	3
PF02057	Glyco_hydro_59	Glycosyl hydrolase family 59	0	3
PF13867	SAP30_Sin3_bdg	Sin3 binding region of histone deacetylase complex subunit SAP30	0	3
PF15477	SMAP	Small acidic protein family	0	3
PF01436	NHL	NHL repeat	0	2
PF13923	zf-C3HC4_2	Zinc finger, C3HC4 type (RING finger)	0	2
PF00621	RhoGEF	RhoGEF domain	0	2
PF12756	zf-C2H2_2	C2H2 type zinc-finger (2 copies)	0	2
PF00566	RabGAP-TBC	Rab-GTPase-TBC domain	0	2
PF03372	Exo_endo_phos	Endonuclease/Exonuclease/phosphatase family	0	2
PF14634	zf-RING_5	zinc-RING finger domain	0	2
PF13359	DDE_Tnp_4	DDE superfamily endonuclease	0	2
PF05729	NACHT	NACHT domain	0	2
PF00685	Sulfotransfer_1	Sulfotransferase domain	0	2
PF00755	Carn_acyltransf	Choline/Carnitine o-acyltransferase	0	2
PF02825	WWE	WWE domain	0	2
PF00878	CIMR	Cation-independent mannose-6-phosphate receptor repeat	0	2
PF12775	AAA_7	P-loop containing dynein motor region D3	0	2
PF00001	7tm_1	7 transmembrane receptor (rhodopsin family)	0	2
PF00583	Acetyltransf_1	Acetyltransferase (GNAT) family	0	2
PF01163	RIO1	RIO1 family	0	2
PF00300	His_Phos_1	Histidine phosphatase superfamily (branch 1)	0	2
PF02421	FeoB_N	Ferrous iron transport protein B	0	2
PF00622	SPRY	SPRY domain	0	2
PF00892	EamA	EamA-like transporter family	0	2
PF02784	Orn_Arg_deC_N	Pyridoxal-dependent decarboxylase, pyridoxal binding domain	0	2
PF00989	PAS	PAS fold	0	2
PF00294	PfkB	pfkB family carbohydrate kinase	0	2
PF08416	PTB	Phosphotyrosine-binding domain	0	2
PF00854	PTR2	POT family	0	2
PF01428	zf-AN1	AN1-like Zinc finger	0	2
PF00278	Orn_DAP_Arg_deC	Pyridoxal-dependent decarboxylase, C-terminal sheet domain	0	2
PF00249	Myb_DNA-binding	Myb-like DNA-binding domain	0	2
PF13716	CRAL_TRIO_2	Divergent CRAL/TRIO domain	0	2
PF07859	Abhydrolase_3	alpha/beta hydrolase fold	0	2
PF01532	Glyco_hydro_47	Glycosyl hydrolase family 47	0	2
PF00324	AA_permease	Amino acid permease	0	2
PF05185	PRMT5	PRMT5 arginine-N-methyltransferase	0	2
PF08239	SH3_3	Bacterial SH3 domain	0	2
PF00452	Bcl-2	Apoptosis regulator proteins, Bcl-2 family	0	2
PF00636	Ribonuclease_3	Ribonuclease III domain	0	2
PF02535	Zip	ZIP Zinc transporter	0	2
PF02889	Sec63	Sec63 Brl domain	0	2
PF13604	AAA_30	AAA domain	0	2
PF00995	Sec1	Sec1 family	0	2
PF01408	GFO_IDH_MocA	Oxidoreductase family, NAD-binding Rossmann fold	0	2
PF13458	Peripla_BP_6	Periplasmic binding protein	0	2
PF13921	Myb_DNA-bind_6	Myb-like DNA-binding domain	0	2
PF00200	Disintegrin	Disintegrin	0	2
PF00638	Ran_BP1	RanBP1 domain	0	2
PF02263	GBP	Guanylate-binding protein, N-terminal domain	0	2
PF03283	PAE	Pectinacetylesterase	0	2
PF05048	NosD	Periplasmic copper-binding protein (NosD)	0	2
PF07731	Cu-oxidase_2	Multicopper oxidase	0	2
PF12656	G-patch_2	DExH-box splicing factor binding site	0	2
PF01596	Methyltransf_3	O-methyltransferase	0	2
PF02434	Fringe	Fringe-like	0	2
PF02709	Glyco_transf_7C	N-terminal domain of galactosyltransferase	0	2
PF05470	eIF-3c_N	Eukaryotic translation initiation factor 3 subunit 8 N-terminus	0	2
PF10559	Plug_translocon	Plug domain of Sec61p	0	2
PF01712	dNK	Deoxynucleoside kinase	0	2
PF03781	FGE-sulfatase	Sulfatase-modifying factor enzyme 1	0	2
PF01012	ETF	Electron transfer flavoprotein domain	0	2
PF12838	Fer4_7	4Fe-4S dicluster domain	0	2
PF00705	PCNA_N	Proliferating cell nuclear antigen, N-terminal domain	0	2
PF01058	Oxidored_q6	NADH ubiquinone oxidoreductase, 20 Kd subunit	0	2
PF13187	Fer4_9	4Fe-4S dicluster domain	0	2
PF13442	Cytochrome_CBB3	Cytochrome C oxidase, cbb3-type, subunit III	0	2
PF05018	DUF667	Protein of unknown function (DUF667)	0	2
PF00081	Sod_Fe_N	Iron/manganese superoxide dismutases, alpha-hairpin domain	0	2
PF00164	Ribosom_S12_S23	Ribosomal protein S12/S23	0	2
PF01176	eIF-1a	Translation initiation factor 1A / IF-1	0	2
PF01261	AP_endonuc_2	Xylose isomerase-like TIM barrel	0	2
PF04146	YTH	YT521-B-like domain	0	2
PF00329	Complex1_30kDa	Respiratory-chain NADH dehydrogenase, 30 Kd subunit	0	2
PF00410	Ribosomal_S8	Ribosomal protein S8	0	2
PF00915	Calici_coat	Calicivirus coat protein	0	2
PF01016	Ribosomal_L27	Ribosomal L27 protein	0	2
PF01257	2Fe-2S_thioredx	Thioredoxin-like [2Fe-2S] ferredoxin	0	2
PF01283	Ribosomal_S26e	Ribosomal protein S26e	0	2
PF02109	DAD	DAD family	0	2
PF03896	TRAP_alpha	Translocon-associated protein (TRAP), alpha subunit	0	2
PF04716	ETC_C1_NDUFA5	ETC complex I subunit conserved region	0	2
PF04718	ATP-synt_G	Mitochondrial ATP synthase g subunit	0	2
PF05456	eIF_4EBP	Eukaryotic translation initiation factor 4E binding protein (EIF4EBP)	0	2
PF05753	TRAP_beta	Translocon-associated protein beta (TRAPB)	0	2
PF05821	NDUF_B8	NADH-ubiquinone oxidoreductase ASHI subunit (CI-ASHI or NDUFB8)	0	2
PF06140	Ifi-6-16	Interferon-induced 6-16 family	0	2
PF07074	TRAP-gamma	Translocon-associated protein, gamma subunit (TRAP-gamma)	0	2
PF07946	DUF1682	Protein of unknown function (DUF1682)	0	2
PF09173	eIF2_C	Initiation factor eIF2 gamma, C terminal	0	2
PF10274	ParcG	Parkin co-regulated protein	0	2
PF13085	Fer2_3	2Fe-2S iron-sulfur cluster binding domain	0	2
PF07748	Glyco_hydro_38C	Glycosyl hydrolases family 38 C-terminal domain	0	2
PF00534	Glycos_transf_1	Glycosyl transferases group 1	0	2
PF00790	VHS	VHS domain	0	2
PF00794	PI3K_rbd	PI3-kinase family, ras-binding domain	0	2
PF02225	PA	PA domain	0	2
PF02837	Glyco_hydro_2_N	Glycosyl hydrolases family 2, sugar binding domain	0	2
PF03455	dDENN	dDENN domain	0	2
PF06017	Myosin_TH1	Myosin tail	0	2
PF06371	Drf_GBD	Diaphanous GTPase-binding Domain	0	2
PF14555	UBA_4	UBA-like domain	0	2
PF01008	IF-2B	Initiation factor 2 subunit family	0	2
PF03782	AMOP	AMOP domain	0	2
PF03820	Mtc	Tricarboxylate carrier	0	2
PF10277	Frag1	Frag1/DRAM/Sfk1 family	0	2
PF00337	Gal-bind_lectin	Galactoside-binding lectin	0	2
PF00703	Glyco_hydro_2	Glycosyl hydrolases family 2	0	2
PF01193	RNA_pol_L	RNA polymerase Rpb3/Rpb11 dimerisation domain	0	2
PF01762	Galactosyl_T	Galactosyltransferase	0	2
PF02996	Prefoldin	Prefoldin subunit	0	2
PF05843	Suf	Suppressor of forked protein (Suf)	0	2
PF10409	PTEN_C2	C2 domain of PTEN tumour-suppressor protein	0	2
PF10503	Esterase_phd	Esterase PHB depolymerase	0	2
PF15508	NAAA-beta	beta subunit of N-acylethanolamine-hydrolyzing acid amidase	0	2
PF00055	Laminin_N	Laminin N-terminal (Domain VI)	0	2
PF00752	XPG_N	XPG N-terminal domain	0	2
PF01409	tRNA-synt_2d	tRNA synthetases class II core domain (F)	0	2
PF02275	CBAH	Linear amide C-N hydrolases, choloylglycine hydrolase family	0	2
PF05916	Sld5	GINS complex protein	0	2
PF06337	DUSP	DUSP domain	0	2
PF00144	Beta-lactamase	Beta-lactamase	0	2
PF00749	tRNA-synt_1c	tRNA synthetases class I (E and Q), catalytic domain	0	2
PF01041	DegT_DnrJ_EryC1	DegT/DnrJ/EryC1/StrS aminotransferase family	0	2
PF01088	Peptidase_C12	Ubiquitin carboxyl-terminal hydrolase, family 1	0	2
PF01182	Glucosamine_iso	Glucosamine-6-phosphate isomerases/6-phosphogluconolactonase	0	2
PF02824	TGS	TGS domain	0	2
PF02877	PARP_reg	Poly(ADP-ribose) polymerase, regulatory domain	0	2
PF02878	PGM_PMM_I	Phosphoglucomutase/phosphomannomutase, alpha/beta/alpha domain I	0	2
PF03109	ABC1	ABC1 family	0	2
PF03178	CPSF_A	CPSF A subunit region	0	2
PF03416	Peptidase_C54	Peptidase family C54	0	2
PF03441	FAD_binding_7	FAD binding domain of DNA photolyase	0	2
PF04051	TRAPP	Transport protein particle (TRAPP) component	0	2
PF04909	Amidohydro_2	Amidohydrolase	0	2
PF07744	SPOC	SPOC domain	0	2
PF07973	tRNA_SAD	Threonyl and Alanyl tRNA synthetase second additional domain	0	2
PF07986	TBCC	Tubulin binding cofactor C	0	2
PF08719	DUF1768	Domain of unknown function (DUF1768)	0	2
PF10367	Vps39_2	Vacuolar sorting protein 39 domain 2	0	2
PF13521	AAA_28	AAA domain	0	2
PF13757	VIT_2	Vault protein inter-alpha-trypsin domain	0	2
PF13806	Rieske_2	Rieske-like [2Fe-2S] domain	0	2
PF02817	E3_binding	e3 binding domain	0	2
PF04157	EAP30	EAP30/Vps36 family	0	2
PF09337	zf-H2C2	His(2)-Cys(2) zinc finger	0	2
PF00448	SRP54	SRP54-type protein, GTPase domain	0	2
PF00465	Fe-ADH	Iron-containing alcohol dehydrogenase	0	2
PF00659	POLO_box	POLO box duplicated region	0	2
PF00701	DHDPS	Dihydrodipicolinate synthetase family	0	2
PF00834	Ribul_P_3_epim	Ribulose-phosphate 3 epimerase family	0	2
PF01031	Dynamin_M	Dynamin central region	0	2
PF01161	PBP	Phosphatidylethanolamine-binding protein	0	2
PF01273	LBP_BPI_CETP	LBP / BPI / CETP family, N-terminal domain	0	2
PF01507	PAPS_reduct	Phosphoadenosine phosphosulfate reductase family	0	2
PF01841	Transglut_core	Transglutaminase-like superfamily	0	2
PF01937	DUF89	Protein of unknown function DUF89	0	2
PF01956	DUF106	Integral membrane protein DUF106	0	2
PF02966	DIM1	Mitosis protein DIM1	0	2
PF03259	Robl_LC7	Roadblock/LC7 domain	0	2
PF03368	Dicer_dimer	Dicer dimerisation domain	0	2
PF03370	CBM_21	Putative phosphatase regulatory subunit	0	2
PF03483	B3_4	B3/4 domain	0	2
PF03643	Vps26	Vacuolar protein sorting-associated protein 26	0	2
PF03950	tRNA-synt_1c_C	tRNA synthetases class I (E and Q), anti-codon binding domain	0	2
PF04046	PSP	PSP	0	2
PF04144	SCAMP	SCAMP family	0	2
PF04560	RNA_pol_Rpb2_7	RNA polymerase Rpb2, domain 7	0	2
PF06087	Tyr-DNA_phospho	Tyrosyl-DNA phosphodiesterase	0	2
PF08646	Rep_fac-A_C	Replication factor-A C terminal domain	0	2
PF10243	MIP-T3	Microtubule-binding protein MIP-T3	0	2
PF12456	hSac2	Inositol phosphatase	0	2
PF13549	ATP-grasp_5	ATP-grasp domain	0	2
PF13656	RNA_pol_L_2	RNA polymerase Rpb3/Rpb11 dimerisation domain	0	2
PF14050	Nudc_N	N-terminal conserved domain of Nudc.	0	2
PF14721	AIF_C	Apoptosis-inducing factor, mitochondrion-associated, C-term	0	2
PF01842	ACT	ACT domain	0	2
PF02219	MTHFR	Methylenetetrahydrofolate reductase	0	2
PF03517	Voldacs	Regulator of volume decrease after cellular swelling	0	2
PF03723	Hemocyanin_C	Hemocyanin, ig-like domain	0	2
PF03909	BSD	BSD domain	0	2
PF04733	Coatomer_E	Coatomer epsilon subunit	0	2
PF04893	Yip1	Yip1 domain	0	2
PF05592	Bac_rhamnosid	Bacterial alpha-L-rhamnosidase	0	2
PF07159	DUF1394	Protein of unknown function (DUF1394)	0	2
PF11492	Dicistro_VP4	Cricket paralysis virus, VP4	0	2
PF13862	BCIP	p21-C-terminal region-binding protein	0	2
PF00075	RNase_H	RNase H	0	2
PF00208	ELFV_dehydrog	Glutamate/Leucine/Phenylalanine/Valine dehydrogenase	0	2
PF00268	Ribonuc_red_sm	Ribonucleotide reductase, small chain	0	2
PF00349	Hexokinase_1	Hexokinase	0	2
PF00542	Ribosomal_L12	Ribosomal protein L7/L12 C-terminal domain	0	2
PF00840	Glyco_hydro_7	Glycosyl hydrolase family 7	0	2
PF00853	Runt	Runt domain	0	2
PF00886	Ribosomal_S16	Ribosomal protein S16	0	2
PF00931	NB-ARC	NB-ARC domain	0	2
PF01020	Ribosomal_L40e	Ribosomal L40e family	0	2
PF01113	DapB_N	Dihydrodipicolinate reductase, N-terminus	0	2
PF01125	G10	G10 protein	0	2
PF01196	Ribosomal_L17	Ribosomal protein L17	0	2
PF01214	CK_II_beta	Casein kinase II regulatory subunit	0	2
PF01419	Jacalin	Jacalin-like lectin domain	0	2
PF01443	Viral_helicase1	Viral (Superfamily 1) RNA helicase	0	2
PF01454	MAGE	MAGE family	0	2
PF01512	Complex1_51K	Respiratory-chain NADH dehydrogenase 51 Kd subunit	0	2
PF01907	Ribosomal_L37e	Ribosomal protein L37e	0	2
PF01940	DUF92	Integral membrane protein DUF92	0	2
PF01992	vATP-synt_AC39	ATP synthase (C/AC39) subunit	0	2
PF02922	CBM_48	Carbohydrate-binding module 48 (Isoamylase N-terminal domain)	0	2
PF02933	CDC48_2	Cell division protein 48 (CDC48), domain 2	0	2
PF03066	Nucleoplasmin	Nucleoplasmin	0	2
PF03095	PTPA	Phosphotyrosyl phosphate activator (PTPA) protein	0	2
PF03378	CAS_CSE1	CAS/CSE protein, C-terminus	0	2
PF03439	Spt5-NGN	Early transcription elongation factor of RNA pol II, NGN section	0	2
PF03485	Arg_tRNA_synt_N	Arginyl tRNA synthetase N terminal domain	0	2
PF03661	UPF0121	Uncharacterised protein family (UPF0121)	0	2
PF03800	Nuf2	Nuf2 family	0	2
PF04054	Not1	CCR4-Not complex component, Not1	0	2
PF04095	NAPRTase	Nicotinate phosphoribosyltransferase (NAPRTase) family	0	2
PF04201	TPD52	Tumour protein D52 family	0	2
PF04614	Pex19	Pex19 protein family	0	2
PF04734	Ceramidase_alk	Neutral/alkaline non-lysosomal ceramidase	0	2
PF04799	Fzo_mitofusin	fzo-like conserved region	0	2
PF04841	Vps16_N	Vps16, N-terminal region	0	2
PF04906	Tweety	Tweety	0	2
PF05064	Nsp1_C	Nsp1-like C-terminal region	0	2
PF05495	zf-CHY	CHY zinc finger	0	2
PF05529	Bap31	B-cell receptor-associated protein 31-like	0	2
PF05608	DUF778	Protein of unknown function (DUF778)	0	2
PF05673	DUF815	Protein of unknown function (DUF815)	0	2
PF06840	DUF1241	Protein of unknown function (DUF1241)	0	2
PF07051	OCIA	Ovarian carcinoma immunoreactive antigen (OCIA)	0	2
PF07524	Bromo_TP	Bromodomain associated	0	2
PF07718	Coatamer_beta_C	Coatomer beta C-terminal region	0	2
PF07815	Abi_HHR	Abl-interactor HHR	0	2
PF07850	Renin_r	Renin receptor-like protein	0	2
PF08324	PUL	PUL domain	0	2
PF08511	COQ9	COQ9	0	2
PF08539	HbrB	HbrB-like	0	2
PF08623	TIP120	TATA-binding protein interacting (TIP20)	0	2
PF08784	RPA_C	Replication protein A C terminal	0	2
PF08920	SF3b1	Splicing factor 3B subunit 1	0	2
PF08953	DUF1899	Domain of unknown function (DUF1899)	0	2
PF09174	Maf1	Maf1 regulator	0	2
PF09271	LAG1-DNAbind	LAG1, DNA binding	0	2
PF09531	Ndc1_Nup	Nucleoporin protein Ndc1-Nup	0	2
PF10046	BLOC1_2	Biogenesis of lysosome-related organelles complex-1 subunit 2	0	2
PF10176	DUF2370	Protein of unknown function (DUF2370)	0	2
PF10187	Nefa_Nip30_N	N-terminal domain of NEFA-interacting nuclear protein NIP30	0	2
PF10188	Oscp1	Organic solute transport protein 1	0	2
PF10208	Armet	Degradation arginine-rich protein for mis-folding	0	2
PF10231	DUF2315	Uncharacterised conserved protein (DUF2315)	0	2
PF10241	KxDL	Uncharacterized conserved protein	0	2
PF10394	Hat1_N	Histone acetyl transferase HAT1 N-terminus	0	2
PF10406	TAF8_C	Transcription factor TFIID complex subunit 8 C-term	0	2
PF10568	Tom37	Outer mitochondrial membrane transport complex protein	0	2
PF10589	NADH_4Fe-4S	NADH-ubiquinone oxidoreductase-F iron-sulfur binding region	0	2
PF12134	PRP8_domainIV	PRP8 domain IV core	0	2
PF12295	Symplekin_C	Symplekin tight junction protein C terminal	0	2
PF12701	LSM14	Scd6-like Sm domain	0	2
PF12999	PRKCSH-like	Glucosidase II beta subunit-like	0	2
PF13336	AcetylCoA_hyd_C	Acetyl-CoA hydrolase/transferase C-terminal domain	0	2
PF13420	Acetyltransf_4	Acetyltransferase (GNAT) domain	0	2
PF13452	MaoC_dehydrat_N	N-terminal half of MaoC dehydratase	0	2
PF13664	DUF4149	Domain of unknown function (DUF4149)	0	2
PF14304	CSTF_C	Transcription termination and cleavage factor C-terminal	0	2
PF14327	CSTF2_hinge	Hinge domain of cleavage stimulation factor subunit 2	0	2
PF14438	SM-ATX	Ataxin 2 SM domain	0	2
PF14533	USP7_C2	Ubiquitin-specific protease C-terminal	0	2
PF14699	hGDE_N	N-terminal domain from the human glycogen debranching enzyme	0	2
PF14701	hDGE_amylase	glucanotransferase domain of human glycogen debranching enzyme	0	2
PF14702	hGDE_central	central domain of human glycogen debranching enzyme	0	2
PF14745	WASH-7_N	WASH complex subunit 7, N-terminal	0	2
PF14796	AP3B1_C	Clathrin-adaptor complex-3 beta-1 subunit C-terminal	0	2
PF14966	DNA_repr_REX1B	DNA repair REX1-B	0	2
PF15065	NCU-G1	Lysosomal transcription factor, NCU-G1	0	2
PF15454	LAMTOR	Late endosomal/lysosomal adaptor and MAPK and MTOR activator	0	2
PF02272	DHHA1	DHHA1 domain	0	2
PF02970	TBCA	Tubulin binding cofactor A	0	2
PF03879	Cgr1	Cgr1 family	0	2
PF07834	RanGAP1_C	RanGAP1 C-terminal domain	0	2
PF08276	PAN_2	PAN-like domain	0	2
PF12210	Hrs_helical	Hepatocyte growth factor-regulated tyrosine kinase substrate	0	2
PF13866	zf-SAP30	SAP30 zinc-finger	0	2
PF00917	MATH	MATH domain	0	1
PF00628	PHD	PHD-finger	0	1
PF13423	UCH_1	Ubiquitin carboxyl-terminal hydrolase	0	1
PF12937	F-box-like	F-box-like	0	1
PF00225	Kinesin	Kinesin motor domain	0	1
PF12780	AAA_8	P-loop containing dynein motor region D4	0	1
PF01302	CAP_GLY	CAP-Gly domain	0	1
PF00293	NUDIX	NUDIX domain	0	1
PF01585	G-patch	G-patch domain	0	1
PF01663	Phosphodiest	Type I phosphodiesterase / nucleotide pyrophosphatase	0	1
PF00610	DEP	Domain found in Dishevelled, Egl-10, and Pleckstrin (DEP)	0	1
PF01490	Aa_trans	Transmembrane amino acid transporter protein	0	1
PF00856	SET	SET domain	0	1
PF06325	PrmA	Ribosomal protein L11 methyltransferase (PrmA)	0	1
PF03221	HTH_Tnp_Tc5	Tc5 transposase DNA-binding domain	0	1
PF00178	Ets	Ets-domain	0	1
PF02338	OTU	OTU-like cysteine protease	0	1
PF03137	OATP	Organic Anion Transporter Polypeptide (OATP) family	0	1
PF00211	Guanylate_cyc	Adenylate and Guanylate cyclase catalytic domain	0	1
PF00641	zf-RanBP	Zn-finger in Ran binding protein and others	0	1
PF04408	HA2	Helicase associated domain (HA2)	0	1
PF13583	Reprolysin_4	Metallo-peptidase family M12B Reprolysin-like	0	1
PF01553	Acyltransferase	Acyltransferase	0	1
PF13843	DDE_Tnp_1_7	Transposase IS4	0	1
PF02146	SIR2	Sir2 family	0	1
PF07717	OB_NTP_bind	Oligonucleotide/oligosaccharide-binding (OB)-fold	0	1
PF03151	TPT	Triose-phosphate Transporter family	0	1
PF13508	Acetyltransf_7	Acetyltransferase (GNAT) domain	0	1
PF00618	RasGEF_N	RasGEF N-terminal motif	0	1
PF01151	ELO	GNS1/SUR4 family	0	1
PF00258	Flavodoxin_1	Flavodoxin	0	1
PF00667	FAD_binding_1	FAD binding domain	0	1
PF14291	DUF4371	Domain of unknown function (DUF4371)	0	1
PF02037	SAP	SAP domain	0	1
PF02353	CMAS	Mycolic acid cyclopropane synthetase	0	1
PF01138	RNase_PH	3' exoribonuclease family, domain 1	0	1
PF05585	DUF1758	Putative peptidase (DUF1758)	0	1
PF12706	Lactamase_B_2	Beta-lactamase superfamily domain	0	1
PF14752	RBP_receptor	Retinol binding protein receptor	0	1
PF01697	Glyco_transf_92	Glycosyltransferase family 92	0	1
PF04055	Radical_SAM	Radical SAM superfamily	0	1
PF00019	TGF_beta	Transforming growth factor beta like domain	0	1
PF00855	PWWP	PWWP domain	0	1
PF00888	Cullin	Cullin family	0	1
PF01369	Sec7	Sec7 domain	0	1
PF00339	Arrestin_N	Arrestin (or S-antigen), N-terminal domain	0	1
PF01437	PSI	Plexin repeat	0	1
PF13419	HAD_2	Haloacid dehalogenase-like hydrolase	0	1
PF13903	Claudin_2	PMP-22/EMP/MP20/Claudin tight junction	0	1
PF01212	Beta_elim_lyase	Beta-eliminating lyase	0	1
PF02260	FATC	FATC domain	0	1
PF13673	Acetyltransf_10	Acetyltransferase (GNAT) domain	0	1
PF13965	SID-1_RNA_chan	dsRNA-gated channel SID-1	0	1
PF14310	Fn3-like	Fibronectin type III-like domain	0	1
PF00394	Cu-oxidase	Multicopper oxidase	0	1
PF00483	NTP_transferase	Nucleotidyl transferase	0	1
PF00135	COesterase	Carboxylesterase family	0	1
PF15410	PH_9	Pleckstrin homology domain	0	1
PF01704	UDPGP	UTP--glucose-1-phosphate uridylyltransferase	0	1
PF02449	Glyco_hydro_42	Beta-galactosidase	0	1
PF01084	Ribosomal_S18	Ribosomal protein S18	0	1
PF13330	Mucin2_WxxW	Mucin-2 protein WxxW repeating region	0	1
PF01146	Caveolin	Caveolin	0	1
PF01583	APS_kinase	Adenylylsulphate kinase	0	1
PF01676	Metalloenzyme	Metalloenzyme superfamily	0	1
PF01747	ATP-sulfurylase	ATP-sulfurylase	0	1
PF06071	YchF-GTPase_C	Protein of unknown function (DUF933)	0	1
PF09440	eIF3_N	eIF3 subunit 6 N terminal domain	0	1
PF09728	Taxilin	Myosin-like coiled-coil protein	0	1
PF10515	APP_amyloid	beta-amyloid precursor protein C-terminus	0	1
PF12901	SUZ-C	SUZ-C motif	0	1
PF14617	CMS1	U3-containing 90S pre-ribosomal complex subunit	0	1
PF01053	Cys_Met_Meta_PP	Cys/Met metabolism PLP-dependent enzyme	0	1
PF03464	eRF1_2	eRF1 domain 2	0	1
PF13015	PRKCSH_1	Glucosidase II beta subunit-like protein	0	1
PF13911	AhpC-TSA_2	AhpC/TSA antioxidant enzyme	0	1
PF00887	ACBP	Acyl CoA binding protein	0	1
PF03465	eRF1_3	eRF1 domain 3	0	1
PF04145	Ctr	Ctr copper transporter family	0	1
PF05186	Dpy-30	Dpy-30 motif	0	1
PF04261	Dyp_perox	Dyp-type peroxidase family	0	1
PF00105	zf-C4	Zinc finger, C4 type (two domains)	0	1
PF01603	B56	Protein phosphatase 2A regulatory B subunit (B56 family)	0	1
PF02144	Rad1	Repair protein Rad1/Rec1/Rad17	0	1
PF05071	NDUFA12	NADH ubiquinone oxidoreductase subunit NDUFA12	0	1
PF00166	Cpn10	Chaperonin 10 Kd subunit	0	1
PF00586	AIRS	AIR synthase related protein, N-terminal domain	0	1
PF02064	MAS20	MAS20 protein import receptor	0	1
PF02271	UCR_14kD	Ubiquinol-cytochrome C reductase complex 14kD subunit	0	1
PF02769	AIRS_C	AIR synthase related protein, C-terminal domain	0	1
PF04683	Proteasom_Rpn13	Proteasome complex subunit Rpn13 ubiquitin receptor	0	1
PF04800	ETC_C1_NDUFA4	ETC complex I subunit conserved region	0	1
PF05328	CybS	CybS	0	1
PF05348	UMP1	Proteasome maturation factor UMP1	0	1
PF06110	DUF953	Eukaryotic protein of unknown function (DUF953)	0	1
PF08003	Methyltransf_9	Protein of unknown function (DUF1698)	0	1
PF08152	GUCT	GUCT (NUC152) domain	0	1
PF08560	DUF1757	Protein of unknown function (DUF1757)	0	1
PF10249	NDUFB10	NADH-ubiquinone oxidoreductase subunit 10	0	1
PF11027	DUF2615	Protein of unknown function (DUF2615)	0	1
PF12424	ATP_Ca_trans_C	Plasma membrane calcium transporter ATPase C terminal	0	1
PF13607	Succ_CoA_lig	Succinyl-CoA ligase like flavodoxin domain	0	1
PF15228	DAP	Death-associated protein	0	1
PF04281	Tom22	Mitochondrial import receptor subunit Tom22	0	1
PF06212	GRIM-19	GRIM-19 protein	0	1
PF09412	XendoU	Endoribonuclease XendoU	0	1
PF10206	WRW	Mitochondrial F1F0-ATP synthase, subunit f	0	1
PF14942	Muted	Organelle biogenesis, Muted-like protein	0	1
PF07478	Dala_Dala_lig_C	D-ala D-ala ligase C-terminus	0	1
PF07732	Cu-oxidase_3	Multicopper oxidase	0	1
PF08423	Rad51	Rad51	0	1
PF13650	Asp_protease_2	Aspartyl protease	0	1
PF00282	Pyridoxal_deC	Pyridoxal-dependent decarboxylase conserved domain	0	1
PF00288	GHMP_kinases_N	GHMP kinases N terminal domain	0	1
PF00653	BIR	Inhibitor of Apoptosis domain	0	1
PF01207	Dus	Dihydrouridine synthase (Dus)	0	1
PF01425	Amidase	Amidase	0	1
PF01805	Surp	Surp module	0	1
PF02383	Syja_N	SacI homology domain	0	1
PF02544	Steroid_dh	3-oxo-5-alpha-steroid 4-dehydrogenase	0	1
PF02836	Glyco_hydro_2_C	Glycosyl hydrolases family 2, TIM barrel domain	0	1
PF03031	NIF	NLI interacting factor-like phosphatase	0	1
PF06367	Drf_FH3	Diaphanous FH3 Domain	0	1
PF08711	Med26	TFIIS helical bundle-like domain	0	1
PF10557	Cullin_Nedd8	Cullin protein neddylation domain	0	1
PF14707	Sulfatase_C	C-terminal region of aryl-sulfatase	0	1
PF02786	CPSase_L_D2	Carbamoyl-phosphate synthase L chain, ATP binding domain	0	1
PF03061	4HBT	Thioesterase superfamily	0	1
PF04116	FA_hydroxylase	Fatty acid hydroxylase superfamily	0	1
PF04577	DUF563	Protein of unknown function (DUF563)	0	1
PF05401	NodS	Nodulation protein S (NodS)	0	1
PF08445	FR47	FR47-like protein	0	1
PF13692	Glyco_trans_1_4	Glycosyl transferases group 1	0	1
PF14008	Metallophos_C	Iron/zinc purple acid phosphatase-like protein C	0	1
PF00795	CN_hydrolase	Carbon-nitrogen hydrolase	0	1
PF01504	PIP5K	Phosphatidylinositol-4-phosphate 5-Kinase	0	1
PF01756	ACOX	Acyl-CoA oxidase	0	1
PF02267	Rib_hydrolayse	ADP-ribosyl cyclase	0	1
PF02894	GFO_IDH_MocA_C	Oxidoreductase family, C-terminal alpha/beta domain	0	1
PF03166	MH2	MH2 domain	0	1
PF05057	DUF676	Putative serine esterase (DUF676)	0	1
PF05679	CHGN	Chondroitin N-acetylgalactosaminyltransferase	0	1
PF05743	UEV	UEV domain	0	1
PF07701	HNOBA	Heme NO binding associated	0	1
PF07883	Cupin_2	Cupin domain	0	1
PF08704	GCD14	tRNA methyltransferase complex GCD14 subunit	0	1
PF09261	Alpha-mann_mid	Alpha mannosidase, middle domain	0	1
PF10607	CLTH	CTLH/CRA C-terminal to LisH motif domain	0	1
PF10996	Beta-Casp	Beta-Casp domain	0	1
PF13350	Y_phosphatase3	Tyrosine phosphatase family	0	1
PF13481	AAA_25	AAA domain	0	1
PF14461	Prok-E2_B	Prokaryotic E2 family B	0	1
PF15102	TMEM154	TMEM154 protein family	0	1
PF00867	XPG_I	XPG I-region	0	1
PF01434	Peptidase_M41	Peptidase family M41	0	1
PF04563	RNA_pol_Rpb2_1	RNA polymerase beta subunit	0	1
PF08964	Crystall_3	Beta/Gamma crystallin	0	1
PF10240	DUF2464	Protein of unknown function (DUF2464)	0	1
PF14593	PH_3	PH domain	0	1
PF14836	Ubiquitin_3	Ubiquitin-like domain	0	1
PF00141	peroxidase	Peroxidase	0	1
PF00623	RNA_pol_Rpb1_2	RNA polymerase Rpb1, domain 2	0	1
PF00779	BTK	BTK motif	0	1
PF00786	PBD	P21-Rho-binding domain	0	1
PF01019	G_glu_transpept	Gamma-glutamyltranspeptidase	0	1
PF01042	Ribonuc_L-PSP	Endoribonuclease L-PSP	0	1
PF01137	RTC	RNA 3'-terminal phosphate cyclase	0	1
PF01798	Nop	Putative snoRNA binding domain	0	1
PF03016	Exostosin	Exostosin family	0	1
PF03177	Nucleoporin_C	Non-repetitive/WGA-negative nucleoporin C-terminal	0	1
PF04000	Sas10_Utp3	Sas10/Utp3/C1D family	0	1
PF04565	RNA_pol_Rpb2_3	RNA polymerase Rpb2, domain 3	0	1
PF04832	SOUL	SOUL heme-binding protein	0	1
PF04840	Vps16_C	Vps16, C-terminal region	0	1
PF04983	RNA_pol_Rpb1_3	RNA polymerase Rpb1, domain 3	0	1
PF04997	RNA_pol_Rpb1_1	RNA polymerase Rpb1, domain 1	0	1
PF07521	RMMBL	RNA-metabolising metallo-beta-lactamase	0	1
PF10433	MMS1_N	Mono-functional DNA-alkylating methyl methanesulfonate N-term	0	1
PF12130	DUF3585	Protein of unknown function (DUF3585)	0	1
PF14464	Prok-JAB	Prokaryotic homologs of the JAB domain	0	1
PF00445	Ribonuclease_T2	Ribonuclease T2 family	0	1
PF01033	Somatomedin_B	Somatomedin B domain	0	1
PF01231	IDO	Indoleamine 2,3-dioxygenase	0	1
PF02845	CUE	CUE domain	0	1
PF07162	B9-C2	Ciliary basal body-associated, B9 protein	0	1
PF12804	NTP_transf_3	MobA-like NTP transferase domain	0	1
PF00104	Hormone_recep	Ligand-binding domain of nuclear hormone receptor	0	1
PF00154	RecA	recA bacterial DNA recombination protein	0	1
PF00205	TPP_enzyme_M	Thiamine pyrophosphate enzyme, central domain	0	1
PF00919	UPF0004	Uncharacterized protein family UPF0004	0	1
PF00975	Thioesterase	Thioesterase domain	0	1
PF01000	RNA_pol_A_bac	RNA polymerase Rpb3/RpoA insert domain	0	1
PF01180	DHO_dh	Dihydroorotate dehydrogenase	0	1
PF01222	ERG4_ERG24	Ergosterol biosynthesis ERG4/ERG24 family	0	1
PF01472	PUA	PUA domain	0	1
PF01571	GCV_T	Aminomethyltransferase folate-binding domain	0	1
PF01619	Pro_dh	Proline dehydrogenase	0	1
PF02269	TFIID-18kDa	Transcription initiation factor IID, 18kD subunit	0	1
PF02310	B12-binding	B12 binding domain	0	1
PF02403	Seryl_tRNA_N	Seryl-tRNA synthetase N-terminal domain	0	1
PF02735	Ku	Ku70/Ku80 beta-barrel domain	0	1
PF03152	UFD1	Ubiquitin fusion degradation protein UFD1	0	1
PF03556	Cullin_binding	Cullin binding	0	1
PF03641	Lysine_decarbox	Possible lysine decarboxylase	0	1
PF03796	DnaB_C	DnaB-like helicase C terminal domain	0	1
PF04153	NOT2_3_5	NOT2 / NOT3 / NOT5 family	0	1
PF04177	TAP42	TAP42-like family	0	1
PF05041	Pecanex_C	Pecanex protein (C-terminus)	0	1
PF05047	L51_S25_CI-B8	Mitochondrial ribosomal protein L51 / S25 / CI-B8 domain	0	1
PF05189	RTC_insert	RNA 3'-terminal phosphate cyclase (RTC), insert domain	0	1
PF05731	TROVE	TROVE domain	0	1
PF06032	DUF917	Protein of unknown function (DUF917)	0	1
PF06480	FtsH_ext	FtsH Extracellular	0	1
PF07286	DUF1445	Protein of unknown function (DUF1445)	0	1
PF07562	NCD3G	Nine Cysteines Domain of family 3 GPCR	0	1
PF08156	NOP5NT	NOP5NT (NUC127) domain	0	1
PF08669	GCV_T_C	Glycine cleavage T-protein C-terminal barrel domain	0	1
PF09786	CytochromB561_N	Cytochrome B561, N terminal	0	1
PF10211	Ax_dynein_light	Axonemal dynein light chain	0	1
PF10239	DUF2465	Protein of unknown function (DUF2465)	0	1
PF10255	Paf67	RNA polymerase I-associated factor PAF67	0	1
PF10256	Erf4	Golgin subfamily A member 7/ERF4 family	0	1
PF10509	GalKase_gal_bdg	Galactokinase galactose-binding signature	0	1
PF10545	MADF_DNA_bdg	Alcohol dehydrogenase transcription factor Myb/SANT-like	0	1
PF12510	Smoothelin	Smoothelin cytoskeleton protein	0	1
PF13297	Telomere_Sde2_2	Telomere stability C-terminal	0	1
PF13685	Fe-ADH_2	Iron-containing alcohol dehydrogenase	0	1
PF14681	UPRTase	Uracil phosphoribosyltransferase	0	1
PF14744	WASH-7_mid	WASH complex subunit 7	0	1
PF00375	SDF	Sodium:dicarboxylate symporter family	0	1
PF00472	RF-1	RF-1 domain	0	1
PF02142	MGS	MGS-like domain	0	1
PF02223	Thymidylate_kin	Thymidylate kinase	0	1
PF02841	GBP_C	Guanylate-binding protein, C-terminal domain	0	1
PF02881	SRP54_N	SRP54-type protein, helical bundle domain	0	1
PF03153	TFIIA	Transcription factor IIA, alpha/beta subunit	0	1
PF03222	Trp_Tyr_perm	Tryptophan/tyrosine permease family	0	1
PF03650	MPC	Uncharacterised protein family (UPF0041)	0	1
PF05021	NPL4	NPL4 family	0	1
PF08292	RNA_pol_Rbc25	RNA polymerase III subunit Rpc25	0	1
PF10275	Peptidase_C65	Peptidase C65 Otubain	0	1
PF10431	ClpB_D2-small	C-terminal, D2-small domain, of ClpB protein	0	1
PF13774	Longin	Regulated-SNARE-like domain	0	1
PF14260	zf-C4pol	C4-type zinc-finger of DNA polymerase delta	0	1
PF00185	OTCace	Aspartate/ornithine carbamoyltransferase, Asp/Orn binding domain	0	1
PF00186	DHFR_1	Dihydrofolate reductase	0	1
PF00303	Thymidylat_synt	Thymidylate synthase	0	1
PF00317	Ribonuc_red_lgN	Ribonucleotide reductase, all-alpha domain	0	1
PF00453	Ribosomal_L20	Ribosomal protein L20	0	1
PF00491	Arginase	Arginase family	0	1
PF00631	G-gamma	GGL domain	0	1
PF00692	dUTPase	dUTPase	0	1
PF00717	Peptidase_S24	Peptidase S24-like	0	1
PF00750	tRNA-synt_1d	tRNA synthetases class I (R)	0	1
PF00766	ETF_alpha	Electron transfer flavoprotein FAD-binding domain	0	1
PF00927	Transglut_C	Transglutaminase family, C-terminal ig like domain	0	1
PF00977	His_biosynth	Histidine biosynthesis protein	0	1
PF01035	DNA_binding_1	6-O-methylguanine DNA methyltransferase, DNA binding domain	0	1
PF01085	HH_signal	Hedgehog amino-terminal signalling domain	0	1
PF01117	Aerolysin	Aerolysin toxin	0	1
PF01133	ER	Enhancer of rudimentary	0	1
PF01175	Urocanase	Urocanase	0	1
PF01186	Lysyl_oxidase	Lysyl oxidase	0	1
PF01191	RNA_pol_Rpb5_C	RNA polymerase Rpb5, C-terminal domain	0	1
PF01192	RNA_pol_Rpb6	RNA polymerase Rpb6	0	1
PF01218	Coprogen_oxidas	Coproporphyrinogen III oxidase	0	1
PF01243	Pyridox_oxidase	Pyridoxamine 5'-phosphate oxidase	0	1
PF01244	Peptidase_M19	Membrane dipeptidase (Peptidase family M19)	0	1
PF01245	Ribosomal_L19	Ribosomal protein L19	0	1
PF01265	Cyto_heme_lyase	Cytochrome c/c1 heme lyase	0	1
PF01269	Fibrillarin	Fibrillarin	0	1
PF01281	Ribosomal_L9_N	Ribosomal protein L9, N-terminal domain	0	1
PF01321	Creatinase_N	Creatinase/Prolidase N-terminal domain	0	1
PF01329	Pterin_4a	Pterin 4 alpha carbinolamine dehydratase	0	1
PF01351	RNase_HII	Ribonuclease HII	0	1
PF01521	Fe-S_biosyn	Iron-sulphur cluster biosynthesis	0	1
PF01625	PMSR	Peptide methionine sulfoxide reductase	0	1
PF01693	Cauli_VI	Caulimovirus viroplasmin	0	1
PF01783	Ribosomal_L32p	Ribosomal L32p protein family	0	1
PF01786	AOX	Alternative oxidase	0	1
PF01812	5-FTHF_cyc-lig	5-formyltetrahydrofolate cyclo-ligase family	0	1
PF01813	ATP-synt_D	ATP synthase subunit D	0	1
PF01869	BcrAD_BadFG	BadF/BadG/BcrA/BcrD ATPase family	0	1
PF01883	DUF59	Domain of unknown function DUF59	0	1
PF01912	eIF-6	eIF-6 family	0	1
PF01922	SRP19	SRP19 protein	0	1
PF01928	CYTH	CYTH domain	0	1
PF01984	dsDNA_bind	Double-stranded DNA-binding domain	0	1
PF01990	ATP-synt_F	ATP synthase (F/14-kDa) subunit	0	1
PF02100	ODC_AZ	Ornithine decarboxylase antizyme	0	1
PF02127	Peptidase_M18	Aminopeptidase I zinc metalloprotease (M18)	0	1
PF02201	SWIB	SWIB/MDM2 domain	0	1
PF02229	PC4	Transcriptional Coactivator p15 (PC4)	0	1
PF02251	PA28_alpha	Proteasome activator pa28 alpha subunit	0	1
PF02252	PA28_beta	Proteasome activator pa28 beta subunit	0	1
PF02262	Cbl_N	CBL proto-oncogene N-terminal domain 1	0	1
PF02268	TFIIA_gamma_N	Transcription initiation factor IIA, gamma subunit, helical domain	0	1
PF02311	AraC_binding	AraC-like ligand binding domain	0	1
PF02312	CBF_beta	Core binding factor beta subunit	0	1
PF02330	MAM33	Mitochondrial glycoprotein	0	1
PF02374	ArsA_ATPase	Anion-transporting ATPase	0	1
PF02628	COX15-CtaA	Cytochrome oxidase assembly protein	0	1
PF02729	OTCace_N	Aspartate/ornithine carbamoyltransferase, carbamoyl-P binding domain	0	1
PF02751	TFIIA_gamma_C	Transcription initiation factor IIA, gamma subunit	0	1
PF02761	Cbl_N2	CBL proto-oncogene N-terminus, EF hand-like domain	0	1
PF02762	Cbl_N3	CBL proto-oncogene N-terminus, SH2-like domain	0	1
PF02812	ELFV_dehydrog_N	Glu/Leu/Phe/Val dehydrogenase, dimerisation domain	0	1
PF02864	STAT_bind	STAT protein, DNA binding domain	0	1
PF02897	Peptidase_S9_N	Prolyl oligopeptidase, N-terminal beta-propeller domain	0	1
PF02898	NO_synthase	Nitric oxide synthase, oxygenase domain	0	1
PF03079	ARD	ARD/ARD' family	0	1
PF03224	V-ATPase_H_N	V-ATPase subunit H	0	1
PF03311	Cornichon	Cornichon protein	0	1
PF03359	GKAP	Guanylate-kinase-associated protein (GKAP) protein	0	1
PF03477	ATP-cone	ATP cone domain	0	1
PF03531	SSrecog	Structure-specific recognition protein (SSRP1)	0	1
PF03540	TFIID_30kDa	Transcription initiation factor TFIID 23-30kDa subunit	0	1
PF03571	Peptidase_M49	Peptidase family M49	0	1
PF03657	UPF0113	Uncharacterised protein family (UPF0113)	0	1
PF03665	UPF0172	Uncharacterised protein family (UPF0172)	0	1
PF03669	UPF0139	Uncharacterised protein family (UPF0139)	0	1
PF03847	TFIID_20kDa	Transcription initiation factor TFIID subunit A	0	1
PF03874	RNA_pol_Rpb4	RNA polymerase Rpb4	0	1
PF03951	Gln-synt_N	Glutamine synthetase, beta-Grasp domain	0	1
PF03981	Ubiq_cyt_C_chap	Ubiquinol-cytochrome C chaperone	0	1
PF03986	Autophagy_N	Autophagocytosis associated protein (Atg3), N-terminal domain	0	1
PF04037	DUF382	Domain of unknown function (DUF382)	0	1
PF04056	Ssl1	Ssl1-like	0	1
PF04057	Rep-A_N	Replication factor-A protein 1, N-terminal domain	0	1
PF04152	Mre11_DNA_bind	Mre11 DNA-binding presumed domain	0	1
PF04430	DUF498	Protein of unknown function (DUF498/DUF598)	0	1
PF04588	HIG_1_N	Hypoxia induced protein conserved region	0	1
PF04622	ERG2_Sigma1R	ERG2 and Sigma1 receptor like protein	0	1
PF04729	ASF1_hist_chap	ASF1 like histone chaperone	0	1
PF04930	FUN14	FUN14 family	0	1
PF04992	RNA_pol_Rpb1_6	RNA polymerase Rpb1, domain 6	0	1
PF05005	Ocnus	Janus/Ocnus family (Ocnus)	0	1
PF05351	GMP_PDE_delta	GMP-PDE, delta subunit	0	1
PF05527	DUF758	Domain of unknown function (DUF758)	0	1
PF05735	TSP_C	Thrombospondin C-terminal region	0	1
PF05856	ARPC4	ARP2/3 complex 20 kDa subunit (ARPC4)	0	1
PF05890	Ebp2	Eukaryotic rRNA processing protein EBP2	0	1
PF05986	ADAM_spacer1	ADAM-TS Spacer 1	0	1
PF05994	FragX_IP	Cytoplasmic Fragile-X interacting family	0	1
PF05995	CDO_I	Cysteine dioxygenase type I	0	1
PF06026	Rib_5-P_isom_A	Ribose 5-phosphate isomerase A (phosphoriboisomerase A)	0	1
PF06388	DUF1075	Protein of unknown function (DUF1075)	0	1
PF06396	AGTRAP	Angiotensin II, type I receptor-associated protein (AGTRAP)	0	1
PF06415	iPGM_N	BPG-independent PGAM N-terminus (iPGM_N)	0	1
PF06417	DUF1077	Protein of unknown function (DUF1077)	0	1
PF06487	SAP18	Sin3 associated polypeptide p18 (SAP18)	0	1
PF06645	SPC12	Microsomal signal peptidase 12 kDa subunit (SPC12)	0	1
PF06703	SPC25	Microsomal signal peptidase 25 kDa subunit (SPC25)	0	1
PF06775	Seipin	Putative adipose-regulatory protein (Seipin)	0	1
PF06859	Bin3	Bicoid-interacting protein 3 (Bin3)	0	1
PF06936	Selenoprotein_S	Selenoprotein S (SelS)	0	1
PF06984	MRP-L47	Mitochondrial 39-S ribosomal protein L47 (MRP-L47)	0	1
PF07106	TBPIP	Tat binding protein 1(TBP-1)-interacting protein (TBPIP)	0	1
PF07426	Dynactin_p22	Dynactin subunit p22	0	1
PF07502	MANEC	MANEC domain	0	1
PF07533	BRK	BRK domain	0	1
PF07896	DUF1674	Protein of unknown function (DUF1674)	0	1
PF08063	PADR1	PADR1 (NUC008) domain	0	1
PF08146	BP28CT	BP28CT (NUC211) domain	0	1
PF08326	ACC_central	Acetyl-CoA carboxylase, central region	0	1
PF08336	P4Ha_N	Prolyl 4-Hydroxylase alpha-subunit, N-terminal region	0	1
PF08506	Cse1	Cse1	0	1
PF08557	Lipid_DES	Sphingolipid Delta4-desaturase (DES)	0	1
PF08569	Mo25	Mo25-like	0	1
PF08597	eIF3_subunit	Translation initiation factor eIF3 subunit	0	1
PF08615	RNase_H2_suC	Ribonuclease H2 non-catalytic subunit (Ylr154p-like)	0	1
PF08648	DUF1777	Protein of unknown function (DUF1777)	0	1
PF08661	Rep_fac-A_3	Replication factor A protein 3	0	1
PF08825	E2_bind	E2 binding domain	0	1
PF08925	DUF1907	Domain of Unknown Function (DUF1907)	0	1
PF09070	PFU	PFU (PLAA family ubiquitin binding)	0	1
PF09079	Cdc6_C	CDC6, C terminal	0	1
PF09110	HAND	HAND	0	1
PF09111	SLIDE	SLIDE	0	1
PF09180	ProRS-C_1	Prolyl-tRNA synthetase, C-terminal	0	1
PF09402	MSC	Man1-Src1p-C-terminal domain	0	1
PF09532	FDF	FDF domain	0	1
PF09767	DUF2053	Predicted membrane protein (DUF2053)	0	1
PF09788	Tmemb_55A	Transmembrane protein 55A	0	1
PF09793	AD	Anticodon-binding domain	0	1
PF09822	ABC_transp_aux	ABC-type uncharacterized transport system	0	1
PF10147	CR6_interact	Growth arrest and DNA-damage-inducible proteins-interacting protein 1	0	1
PF10166	DUF2368	Uncharacterised conserved protein (DUF2368)	0	1
PF10180	DUF2373	Uncharacterised conserved protein (DUF2373)	0	1
PF10183	ESSS	ESSS subunit of NADH:ubiquinone oxidoreductase (complex I)	0	1
PF10248	Mlf1IP	Myelodysplasia-myeloid leukemia factor 1-interacting protein	0	1
PF10262	Rdx	Rdx family	0	1
PF10276	zf-CHCC	Zinc-finger domain	0	1
PF10415	FumaraseC_C	Fumarase C C-terminus	0	1
PF10498	IFT57	Intra-flagellar transport protein 57	0	1
PF10501	Ribosomal_L50	Ribosomal subunit 39S	0	1
PF10544	T5orf172	T5orf172 domain	0	1
PF10590	PNPOx_C	Pyridoxine 5'-phosphate oxidase C-terminal dimerisation region	0	1
PF10914	DUF2781	Protein of unknown function (DUF2781)	0	1
PF11175	DUF2961	Protein of unknown function (DUF2961)	0	1
PF11261	IRF-2BP1_2	Interferon regulatory factor 2-binding protein zinc finger	0	1
PF11705	RNA_pol_3_Rpc31	DNA-directed RNA polymerase III subunit Rpc31	0	1
PF11708	Slu7	Pre-mRNA splicing Prp18-interacting factor	0	1
PF11718	CPSF73-100_C	Pre-mRNA 3'-end-processing endonuclease polyadenylation factor C-term	0	1
PF11788	MRP-L46	39S mitochondrial ribosomal protein L46	0	1
PF11931	DUF3449	Domain of unknown function (DUF3449)	0	1
PF11957	efThoc1	THO complex subunit 1 transcription elongation factor	0	1
PF11977	RNase_Zc3h12a	Zc3h12a-like Ribonuclease NYN domain	0	1
PF12037	DUF3523	Domain of unknown function (DUF3523)	0	1
PF12125	Beta-TrCP_D	D domain of beta-TrCP	0	1
PF12317	IFT46_B_C	Intraflagellar transport complex B protein 46 C terminal	0	1
PF12455	Dynactin	Dynein associated protein	0	1
PF12496	BNIP2	Bcl2-/adenovirus E1B nineteen kDa-interacting protein 2	0	1
PF13439	Glyco_transf_4	Glycosyltransferase Family 4	0	1
PF13455	MUG113	Meiotically up-regulated gene 113	0	1
PF13462	Thioredoxin_4	Thioredoxin	0	1
PF13468	Glyoxalase_3	Glyoxalase-like domain	0	1
PF14138	COX16	Cytochrome c oxidase assembly protein COX16	0	1
PF14578	GTP_EFTU_D4	Elongation factor Tu domain 4	0	1
PF14646	MYCBPAP	MYCBP-associated protein family	0	1
PF14691	Fer4_20	Dihydroprymidine dehydrogenase domain II, 4Fe-4S cluster	0	1
PF14746	WASH-7_C	WASH complex subunit 7, C-terminal	0	1
PF14759	Reductase_C	Reductase C-terminal	0	1
PF14768	RPA_interact_C	Replication protein A interacting C-terminal	0	1
PF14845	Glycohydro_20b2	beta-acetyl hexosaminidase like	0	1
PF14955	MRP-S24	Mitochondrial ribosome subunit S24	0	1
PF15007	CEP44	Centrosomal spindle body, CEP44	0	1
PF15122	TMEM206	TMEM206 protein family	0	1
PF02077	SURF4	SURF4 family	0	1
PF02915	Rubrerythrin	Rubrerythrin	0	1
PF03208	PRA1	PRA1 family protein	0	1
PF03647	Tmemb_14	Transmembrane proteins 14C	0	1
PF04379	DUF525	Protein of unknown function (DUF525)	0	1
PF05361	PP1_inhibitor	PKC-activated protein phosphatase-1 inhibitor	0	1
PF08583	Cmc1	Cytochrome c oxidase biogenesis protein Cmc1 like	0	1
PF10531	SLBB	SLBB domain	0	1
PF10780	MRP_L53	39S ribosomal protein L53/MRP-L53	0	1
PF11605	Vps36_ESCRT-II	Vacuolar protein sorting protein 36 Vps36	0	1
PF13233	Complex1_LYR_2	Complex1_LYR-like	0	1
PF15043	CNRIP1	CB1 cannabinoid receptor-interacting protein 1	0	1
